# Supplementary material for: Ecomorphological diversification in squamates from conserved pattern of cranial integration
Source: PubMed Central journal article supplement — Proc Natl Acad Sci U S A. 2019 Jul 1;116(29):14688–97. doi: 10.1073/pnas.1820967116 (PMC6642379; doi:10.1073/pnas.1820967116), 2019-07-01
Supplement: pnas.1820967116.sapp.pdf [file pnas.1820967116.sapp.pdf]

## Supplementary Information for

Ecomorphological diversification from conserved pattern of cranial integration in squamates

A Watanabe, A-C Fabre, RN Felice, JA Maisano, J Müller, A Herrel, A Goswami

Akinobu Watanabe  
Email: [awatanab@nyit.edu](mailto:awatanab@nyit.edu)

### **This PDF file includes:**

Supplementary text  
Figs. S1 to S11  
Tables S1 to S12  
References for SI reference citations

## Supplementary Information Text

### Institutional and Fieldwork Abbreviations

|             |                                                                                                          |
|-------------|----------------------------------------------------------------------------------------------------------|
| AMNH (FARB) | American Museum of Natural History (Fossil Amphibians, Reptiles, Birds Collection), New York, NY, U.S.A. |
| CAS         | California Academy of Sciences, San Francisco, CA, U.S.A.                                                |
| CM          | Carnegie Museum of Natural History, Pittsburgh, PA, U.S.A.                                               |
| FLMNH       | Florida Museum of Natural History, Gainesville, FL, U.S.A.                                               |
| FMNH        | Field Museum of Natural History, Chicago, IL, U.S.A.                                                     |
| FRIM        | Forest Research Institute, Kepong, Malaysia                                                              |
| IGM         | Geological Institute, Mongolian Academy of Sciences, Ulaan Bataar, Mongolia                              |
| LACM        | Los Angeles County Museum, Los Angeles, CA, U.S.A.                                                       |
| MAE         | Mongolia-AMNH Expedition                                                                                 |
| MCZ         | Museum of Comparative Zoology, Cambridge, MA, U.S.A.                                                     |
| MNHN        | Muséum national d'Histoire naturelle, Paris, France                                                      |
| NHMUK       | Natural History Museum, London, U.K.                                                                     |
| ROM         | Royal Ontario Museum, Toronto, Canada                                                                    |
| TNHC        | Texas Memorial Museum, Austin, TX, U.S.A.                                                                |
| UCMP        | University of California Museum of Paleontology, Berkeley, CA, U.S.A.                                    |
| UMMZ        | University of Michigan Museum of Zoology, Ann Arbor, MI, U.S.A.                                          |
| USNM        | National Museum of Natural History, Washington, DC, U.S.A.                                               |
| UTA         | University of Texas at Arlington, Arlington, TX, U.S.A.                                                  |
| YPM         | Yale Peabody Museum, New Haven, CT, U.S.A.                                                               |
| ZFMK        | Zoologisches Forschungsmuseum Alexander Koenig, Bonn, Germany                                            |
| ZMB         | Zoological Museum of Berlin, Berlin, Germany                                                             |
| ZPAL        | Institute of Paleobiology, Warsaw, Poland                                                                |

### Taxonomic Sampling

To sample the taxonomic and phylogenetic breadth of Squamata efficiently, we assessed the taxonomic coverage of existing scan data from DigiMorph ([digimorph.org](http://digimorph.org)) representing 129 extant species and supplemented with scans of 45 additional extant taxa from Museum für Naturkunde (Berlin, Germany), Museum for Comparative Zoology (Cambridge, MA, USA), and Morphosource to fill gaps in sampling at our targeted level. When the taxonomic name specified on a specimen was absent or mismatched in the phylogenetic tree, the name was replaced with updated nomenclature in accordance with The Reptile Database ([reptile-database.org](http://reptile-database.org)) or with the closest relative sampled in the tree (*SI Appendix*, Table S2). We ensured that the sampled specimens exhibited sufficient somatic maturity and all regions of interest. Accordingly, specimens with cranial osteoderms inseparable from skull bones, even with CT data, were removed from sampling (e.g., *Anguis*, *Gerrhonotus*, *Gerrhosaurus*, *Ophiodes*, *Ophisaurus*, *Podarcis*). The sex of the specimens was not considered.

For extinct groups, we surveyed the existing literature and online databases (primarily DigiMorph) to identify fossil skulls of squamates that are complete, fully articulated, and minimally deformed. Three-dimensional (3-D) skull reconstructions were created from surface and CT data of fossil specimens that are potentially suitable for the study. Newly scanned specimens for this study included *Carusia intermedia* (IGM 3/17), *Ctenomastax parva* (IGM 3/62), *Dyticonastis rensbergeri* (UCMP 76881), *Eosaniwa koehni* (FMNH XXXVII/57), *Estesia mongoliensis* (AMNH FARB 29072), *Gambelia corona* (LACM 42880), *Globaura venusta* (IGM 3/164), *Helodermoides tuberculatus* (CMNH 51344), *Hymenosaurus clarki* (IGM 3/53), *Isodontosaurus gracilis* (IGM 3/84), *Listromycter leakeyi* (NHMUK R 8292), *Lophocranium rusingense* (NHMUK R 8293), *Peltosaurus granulatus* (AMNH FARB 42193), *Phrynosomimus asper* (IGM 3/181), *Platecarpus coryphaeus* (SMF R417), *Plotosaurus bennisoni*

(UCMP 32778), *Polyglyphanodon sternbergi* (USNM 16588), *Priscagama gobiensis* (MAE 98-154), *Pyramicephalosaurus cherminicus* (IGM 3/130), and *Slavoia darevskii* (ZPAL MgR-I.112).  $\mu$ CT data of *Hyporhina antiqua* (YPM 11390) and *Spathorhynchus fossorium* (USNM 26318) were taken from a previous study (1). Of the specimens scanned, only seven of the specimens exhibited adequate preservation and preparation to collect coordinate data for the study: *Estesia*, *Gambelia*, *Hyporhina*, *Plotosaurus*, *Polyglyphanodon*, *Slavoia*, and *Spathorhynchus*. The final dataset analyzed in this study comprises a total of 181 taxa, with 109 extant non-snake squamate species, 65 snake species, and seven fossil squamate taxa (Table S2).

### Scan Data

To enable efficient sampling of skull reconstructions, the scan data were collected from multiple sources (see ‘Source’ in Table S2). Specimens from DigiMorph (digimorph.org) were scanned with an ACTIS scanner at the High-Resolution X-ray Computed Tomography Facility at the University of Texas at Austin, with the exception of *Anelytropsis papillosus* and *Liotyphlops albirostris* which were scanned at Amherst College using a Skyscan 1172 desktop  $\mu$ -CT scanner (Bruker microCT, Kontich, Belgium). Author A.H. imaged specimens using the X-Tek scanner (X-tek Systems, Ltd., Amherst, NH, U.S.A.) at Harvard University. At Museum für Naturkunde, specimens were scanned using a Phoenix nanotom X-ray|s (General Electric, Boston, MA, U.S.A.). Some fossil specimens were scanned at the Microscopy and Imaging Facility at the American Museum of Natural History. Furthermore, a Go!SCAN surface scanner (Creaform, Lévis, Canada) was used to digitize a few of the fossil specimens. The scanning parameters differ across specimens from attempts to optimize the quality of the scans for individual specimens. Although variation in scan resolution (and contrast for CT imaging) could introduce slight differences in resulting reconstructions, and thereby coordinate data, we considered such differences to be inconsequential relative to the total variation in skull shape across squamates.

### 3-D Reconstructions

VGStudio MAX (Volume Graphics, Heidelberg, Germany) was used to segment and create skull reconstructions for specimens scanned at the High-Resolution X-ray CT Facility at The University of Texas at Austin, Amherst College, and Museum für Naturkunde. Data of specimens scanned at Muséum national d’Histoire naturelle and the American Museum of Natural History were segmented in Avizo (FEI Visualization Sciences, Burlington, MA, USA). VXEelements (Creaform, Lévis, Canada) was used to process surface scan data recorded with Go!SCAN scanners and virtually stitch separate partial scans taken from multiple sides (e.g., dorsal, ventral). In all cases, the resulting skull reconstructions were exported as PLY files.

Next, we imported the PLY files into GeoMagic Wrap (3D Systems, Rock Hill, South Carolina, USA) and prepared the 3-D skull reconstructions for the landmarking procedure. First, small holes, such as foramina, were virtually filled by removing 1–2 polygon-wide rim of the hole and creating a surface across the rim with the ‘Tangent mode’ of the ‘Fill Hole’ tool. We employed this mode for filling holes because it does not modify the surrounding polygons (‘Curvature’ mode) while creating surfaces that conform to the configuration of surrounding polygons (*contra* ‘Flat’ mode). After all small holes were filled, small, isolated components were removed. Lastly, we used the ‘QuickSmooth’ function to make the polygons more uniform in size. The processed reconstructions were then centered at the centroid and exported as a PLY file.

### Coordinate Data

The general protocol for collection of coordinate data follows Felice and Goswami (2). A.W. collected landmark data only from specimens in visually neutral poses, where the articular surfaces and their outlines are immediately adjacent to each other (see ‘Within-Landmark Analyses’). Detailed guidelines

for the procedure will be described in a future publication. Here, we describe aspects of the protocol that are particularly relevant to this study.

We used the program Landmark Editor (3) (<http://graphics.idav.ucdavis.edu/research/EvoMorph>) to virtually place landmarks and curve semi-landmarks that define and outline skull regions determined *a priori* (Table S1). Evolutionarily homologous (Type I) landmarks were sampled to the extent possible. However, due to the considerable phylogenetic and morphological breadth of the study, we adopted more functional definitions for many regions that are applicable across squamates. At this step, liberal sampling of curve semi-landmarks was collected in order to accurately follow the contours of regions (Fig. S1a). Although the program is equipped with tools to place surface semi-landmarks, we elected to perform a semi-automated procedure to place surface semi-landmarks on skull models, as described below. After the placement of landmarks and curve semi-landmarks, the x, y, z coordinate data were exported as PTS files.

We used available packages and code to subsample curve semi-landmarks and place surface semi-landmarks in R (4). Because curve semi-landmarks were liberally sampled in Landmark Editor, subsampling algorithm employed by Botton-Divet and colleagues (5) was used to sample far fewer numbers of semi-landmarks along each path defined by dozens of existing semi-landmarks (Fig. S1b). The amount of subsampled curve semi-landmarks for each curve was chosen to generally match the density of surface semi-landmarks for that region (Table S1).

For the placement of surface semi-landmarks, we used the `placePatch` function in the `Morpho R` package v2.5.1 (6). This function places surface (patch) semi-landmarks by fitting a template with surface semi-landmarks and the same configuration of landmarks and curve semi-landmarks onto the coordinate data of each specimen that consists of landmarks and curve semi-landmarks. The position of the surface semi-landmarks is determined through a thin-plate spline method. To prevent the surface semi-landmarks from being placed within a mesh (e.g., an internal anatomical structure, reverse side of external surface), the user specifies an ‘inflate’ value to temporarily shift each surface semi-landmark along its normal to the specified magnitude and subsequently ‘deflate’ until the point contacts a mesh surface.

During the course of the study, we found several factors critical to the success of the `placePatch` function. First, for studies with morphologically disparate specimens, a simple geometric representation of the skull and its partitions perform better as a template than using actual or mean skull shape. As such, a 360 x 360 uniform-vertex sphere was created in Meshlab (7) and bisected in Blender (Stitching Blender Foundation, Amsterdam, Netherlands) to create a hemispheric template mesh. The mesh, in PLY format, was then imported into Landmark Editor to manually place the same configuration of landmarks and curve semi-landmarks as on meshes of actual specimens (Fig. S1c,d). In addition, we placed semi-landmarks with consistent density within each region of the template to be mapped on specimen meshes as surface semi-landmarks.

Second, the accuracy of patching improved through stepwise application of the `placePatch` function, instead of patching all surface semi-landmarks altogether. This approach allows the fitting of template landmarks and semi-landmarks on actual specimens to occur within one or few regions, rather than enforcing the entire landmark and curve semi-landmarks configuration of the template onto that of the specimens. In some cases, however, an error occurred for largely unknown reasons when attempting to patch within a single region. For these situations, we discovered that patching two or three regions together resolved the issue (e.g., use of landmarks and curve semi-landmarks of the basioccipital and occipital condyle to patch surface semi-landmarks on the basioccipital).

Third, some bones partially cover other regions of interest in various taxa. This results in the patching algorithm placing surface semi-landmarks on adjacent bones rather than the region of interest. For example, patching procedure led to spurious placements of surface semi-landmarks on the dorsal part of the quadrate bone that overlies the squamosal and supratemporal bones in snakes and non-snake squamates (hereby ‘lizards’), respectively. Likewise, the function often placed surface semi-landmarks for the basioccipital region on the pterygoid and palatine in snakes. To rectify this issue in non-snake squamates, we created skull models with the dorsal portion of the quadrate bone virtually removed for accurate patching of the underlying squamosal while maintaining the patching of the jaw joint. For

snakes, we constructed similar models for patching the supratemporal, as well as another set of skull meshes without the pterygoid and palatine for patching the basioccipital region. This approach allowed the surface semi-landmarks to be inflated upon fitting the template onto the skull reconstructions without being ‘deflated’ onto another bone.

Lastly, accurate patching required multiple, user-specified ‘inflate’ values across partitions and taxa due to two main reasons. First, the ‘inflate’ argument in the `placePatch` function corresponds to unit size. As such, multiple ‘inflate’ values were needed to accommodate the spectrum of size differences that exist in our taxonomic sampling (centroid size range: 47.0 – 4381.2 mm). Second, the large morphological variation exhibited by each region necessitated varying ‘inflate’ values for accurate placement of surface semi-landmarks. Without altering the “inflate” values, running the `placePatch` function resulted in surface semi-landmarks outside of the region of interest (e.g., high inflation relative to the size of the specimen and region) or on the underside of the mesh surface due to insufficient ‘inflate’ values. Although the use of a single ‘inflate’ scheme across all specimens is desired, we prioritized the accuracy of landmark placement to minimize the loss of biologically meaningful morphometric data.

With these considerations, we performed the `placePatch` function with the following parameters: `ray=TRUE`, `tol=0`, and `relax.patch=FALSE`. After patching of surface semi-landmarks, we used the `retroDeformMesh` function in the `Morpho` R package (6) to retrodeform the coordinate points and model of *Estesia* (AMNH 29072), which exhibits shearing. The retrodeformation was based on the bilateral relationships of landmarks, and the semi-landmarks were translated with the transformation of the landmarks. While Schlager and colleagues (8) recommend the use of semi-landmarks for the retrodeformation procedure, we found that the use of only landmarks yielded visually more accurate results possibly due to their overall stronger evolutionary and geometric equivalence compared to curve and surface semi-landmarks. The accuracy and precision of different approaches to retrodeformation will likely differ across datasets.

## Shape Data

Once surface semi-landmarks were mapped to specimen meshes, the right-sided coordinate data were mirrored, creating dummy left-sided coordinates (Fig. S1e). This was done to prevent artifacts of aligning one-sided landmark data, where variation among midline points become exaggerated (9, 10). We utilized the `mirrorfill` function in the `paleomorph` R package (11) to mirror the left-sided curve and surface sliding semi-landmarks based on the bilateral relationships of the landmarks and the median plane defined by the midline landmarks. The mirrored coordinate data were then subjected to a sliding curve and surface semi-landmark alignment within each dataset (i.e., snakes, lizards, extant, combined) under the criterion of minimizing total bending energy. We used the `slider3d` function in the `Morpho` R package (6) to slide the left-sided semi-landmarks that are projected onto the mesh surfaces after each iteration to ensure that their positions are informed by the actual specimens. Parameters specified for the sliding procedure are the following: `tol=1e-30`, `recursive=TRUE`, `iterations=3`, `initproc=TRUE`, `bending=TRUE`, `stepsize=0.1`. This function outputs a coordinate dataset with slid semi-landmarks that restores the (centroid) size of specimens in the given coordinate data. We then performed Procrustes analysis to extract centroid size and shape data using the `gpagen` function in the `geomorph` R package (12, 13) on the slid coordinate data. The landmarks and sliding semi-landmarks on the left-side were then removed (Fig. S1f).

Given the high disparity and mean rates in mobile elements (Fig. 4; *SI Appendix*, Fig. S6), additional variation from tissue fixation of mobile elements must be considered despite our efforts to sample only specimens in neutral poses. Two potential approaches for mitigating this factor is to standardize the orientation across joints and to analyze shape data that have been aligned locally within each module. Although these measures may be suitable for studies with a narrow taxonomic scope, they would confound real biological differences in the relative positions of these mobile elements. In addition, there is a good correspondence in shape variation between globally and locally aligned shape data (*SI*

*Appendix*, Table S12). The latter approach to shape analysis would lead to variance being incomparable across modules due to creation of separate shape spaces. Because of these reasons, we performed analyses on globally aligned coordinate data collected from specimens in visually neutral poses. We also anticipate that the variation from fixation of mobile elements is proportionately small relative to the large interspecific variation in skull shape and bone position.

## Phylogenetic Tree

For comparative phylogenetic analyses, we constructed a time-calibrated phylogeny based on published phylogenetic trees and fossil occurrence data. For extant taxa, we used the published time-calibrated tree of squamates (14). We pruned the extant phylogeny to include only sampled taxa. Extinct taxa were incorporated into the extant phylogeny manually using the equal-branching method (15) based on mean age as reported in the Paleobiology Database ([paleobiodb.org](http://paleobiodb.org)) and published systematic work. The phylogenetic placement of fossil specimens to immediate taxonomic group was primarily based on a comprehensive squamate phylogeny proposed by combined molecular and morphological data (16), with placement of *Hyporhina antiqua* and *Spathorhynchus fossorium* based on the phylogeny of rhineurids put forward by Hipsley and Müller (1). It should be noted, however, that the phylogenetic placement of mosasaurs and *Slavoia* within Squamata remains unclear. Mosasaurs have been placed as sister group to Varaniformes and more derived than Shinisauridae (17), sister group to Scleroglossa (18), or more closely related to Serpentes (19–21). With regard to overall skull shape, the mosasaur *Plotosaurus* resembles varanoid taxa, including *Varanus*, *Heloderma*, and *Estesia* (Fig. S2) although whether this morphological affinity reflects evolutionary history cannot be determined due to the possibility of convergence. Likewise, *Slavoia darevskii* Sulimski 1984 from the Cretaceous of Mongolia has been problematic to place phylogenetically (22). For the present study, we adopt the phylogenetic hypothesis of Reeder and colleagues (16) with an understanding that a consensus will likely be established for the phylogenetic relationship of these taxa in the future. Nevertheless, the impact of sampled fossil taxa on pattern of covariation, variance, and evolutionary rates tends to be restricted to the extinct lineage. For instance, the analysis infers elevated rates of evolution on the branches leading to extinct taxa (Fig. 3a) while inferred rates remain similar for other branches when compared to the extant-only dataset (Fig. S5a). As such, altering the phylogenetic positions of some fossil taxa is expected to yield consistent results for squamates overall. Additionally, we performed analysis of cranial integration (“Combined Dataset (Alternative Topology)” in Table S7) and estimated rates (Fig. S5n–s) on an alternative topology where the mosasaur *Plotosaurus* is placed as sister group to varanids, *Polyglyphanodon* is placed as sister group to Teiidae and Gymnophthalmidae, and *Estesia* is placed as sister group to helodermatids (17). As anticipated, these analyses yielded very similar results to the original topology. One difference is that the evolutionary rate analysis supported OU model as the most likely model for the combined dataset, instead of BM+ $\lambda$  model. Nevertheless, the distribution of rates across the squamate phylogeny is nearly identical. Therefore, the overall results and conclusions are robust to inclusion, removal, and phylogenetic placement of fossil taxa.

## Evolutionary Rates

We used BayesTraitsV3 (23) (<http://www.evolution.rdg.ac.uk/>) to infer the rates of shape evolution along each branch and identify notable shifts in rate while considering various evolutionary models. Ideally, shape evolution should be evaluated with a full set of Procrustes coordinates but currently available methods do not allow model fitting with high-dimensional continuous data (24). Thus, we performed separate principal components (PC) analysis on the lizard, snake, extant, and combined datasets and within each module to extract PC axes that account for 95% of the variation (Table S3). Then, the PC scores were multiplied by 1000 to prevent underflow during analysis. For each PC shape dataset, we evaluated the fit of five evolutionary models: Ornstein-Uhlenbeck, Brownian motion (BM), and BM with delta, kappa, and lambda transformations. The analyses were run with ‘independent contrasts’ to make the

computational time more feasible than using generalized least-squares method with Markov chain Monte Carlo algorithm for parameter space search. Additional parameters include variable rates ('varrates') to estimate a separate rate of evolution for each branch and 500 stones with 10,000 iterations each for efficient estimation of marginal likelihoods (25). Analyses of skull shape data (i.e., lizard, snake, extant, combined datasets) consisted of 5,500,000 iterations, with the first 500,000 iterations removed as burn-in, to accommodate the more complex shape variation and larger number of PC axes. Within-module analyses comprised 1,010,000 iterations, with the first 10,000 iterations removed as burn-in.

Functions in the `BTRtools` package (<https://github.com/hferg/btrtools>) were used to process the output files from BayesTraitsV3. Comparisons among the five evolutionary models was based on Bayes Factor. To construct rate through time plots, the phylogenetic tree was subdivided into one-million-year time bins and the mean rate calculated across all branches in the time bin. Calculations of mean evolutionary rates across the skull and modules were based on full shape space using the `compare.multi.evol.rates` in the `geomorph` R package based on BM model of evolution (26). Assuming the same evolutionary model allows for standard comparison of mean rates across modules.

### **Ecological and Life History Traits**

Trait data were collected for extant taxa from existing literature (Table S5). While ecological traits are often difficult to define categorically, we used the following definitions:

#### **Locomotion:**

- Ground dweller/swimmer: species that spend time in water and on the ground lacking evidence for clear preference for either.
- Ground dweller/digger: species that spend time locomoting on the ground and that regularly dig.
- Ground dweller/climber: species that spend both times locomoting on the ground and climbing on tree or rocks lacking evidence for clear preference for either.
- Climber: species that spend the majority of their time climbing in trees or on rocks.
- Swimmer: species spending majority of their time swimming.
- Ground dweller: species that spend the most part of their time locomoting on the ground, but occasionally climb, swim or dig.
- Digger: species that spend the most part of their time digging or locomoting in burrow.
- Litter dweller: species that spend the most part of their time locomoting in litter.
- Climber/glider: species that spend the majority of their time climbing in trees and gliding from one tree to another.

#### **Habitat:**

- Terrestrial: species that spend the most part of their time on the ground, but occasionally climb, swim or dig.
- Fossorial: species that spend the majority of time on burrows.
- Semi-fossorial: species that spend the majority of time on the ground, but regularly dig burrows or dig to find food.
- Aquatic: species that spend the most of their time in water to forage, escape, disperse.
- Semi-aquatic: species that spend both times in water and on the ground without a clear preference for either.
- Arboreal: species that spend the majority of their time in trees.
- Semi-arboreal: species that spend both time in trees and on the ground without a clear preference for either.
- Semi-aquatic/Semi-fossorial: species that spend times on the ground, but regularly dig burrows or dig to find food as well as foraging and disperse in water.

- Terrestrial saxicolous: species that spend both times on rocky environment and on the ground without a clear preference.
- Saxicolous: species that spend the majority of their time on rocky environment.
- Leaf litter: species that spend the majority of their time on the leaf litter.

Diet:

- Invertivore: species that mainly eat invertebrate prey.
- Carnivore: species that mainly eat vertebrate prey.
- Herbivore: species that mainly eat plants.
- Omnivore: species that eat vertebrate and invertebrate prey in addition to feeding on a variety of fruits, eggs, and other foods.

Reproductive mode:

- Oviparous: species that lay eggs.
- Viviparity: species that retain developing eggs inside the maternal body (either reproductive tracts or body cavity) giving birth to a free-living newborn. Due to only few taxa in the category, ovoviviparous species were considered to be viviparous.

For reproductive mode, we analyzed viviparous and oviparous taxa although we acknowledge that viviparity in squamates is characterized as a continuum (27). However, detailed information reflecting the reproductive spectrum is not known for many squamate taxa. Therefore, we relied on categories recorded across squamates in previously published literature and have been used in previous studies.

We plotted mean evolutionary rates for each trait value and partition to visualize any large-scale patterns (Fig. S6). To test for significant predictors of skull shape, we performed phylogenetic generalized least squares (PGLS) analyses on full shape data and trait data using the `procD.pgls` function in `geomorph` (Table S6). Some of the more complex categories (“Ground dweller/Swimmer/Digger” and “Swimmer/Climber/Ground dweller”) were assigned as a “generalist” because they were represented by one or two species. However, other categories with multiple assignments were used in our analyses because our high-density morphometric approach, compared to traditional morphometric data, has the capacity to reveal subtle shape differences among these complex categories. Combining these discernible ecological differences into one category (i.e., “generalist”) would likely obfuscate genuine signal in our data. Ideally, we would perform analyses that account for overlap of ecological trait categories but existing methods (e.g., PGLS analysis) cannot currently account for this issue. A solution is to analyze percentages of habitat occupation or stomach content types, but adequately detailed data are not available for most squamate taxa.

## Cranial Integration

To assess the degree of cranial integration, we employed existing computational tools that are robust to high-dimensional morphometric data. Lizard, snake, extant-only, and combined extant and extinct datasets were subjected to EMMLi, a maximum-likelihood approach, and analysis based on covariance-ratio (CR) with and without phylogenetic correction of the data. For non-phylogenetically informed analyses, CR and EMMLi generated mostly congruent results. In lizards, relatively high correlation and covariation exist between the frontal and parietal, jugal and jaw joint, supra-otoccipital, basioccipital, and occipital condyle, and pterygoid and palatine. Snakes show elevated covariation and correlation between the occipital elements (i.e., supra-otooccipital, basioccipital, occipital condyle) and, in contrast with lizards, between the jaw joint with supra-otoccipital, pterygoid, and occipital condyle. The extant dataset shows high covariation and correlation between the jaw joint and basioccipital, jaw joint and pterygoid, basioccipital and pterygoid, and occipital elements. Although there are some differences between results from CR and EMMLi, the general patterns are consistent.



Despite recent methodological efforts to mitigate statistical issues related to high-dimensional data (“curse of dimensionality” (24, 28)), analysis of such phenotypic data remains challenging. As such, the robustness of statistical results based on high-dimensional datasets requires evaluation. To assess the reliability of the pattern of correlation among regions, we performed EMMLi on datasets subsampled to 10% of the total landmark + sliding semi-landmark dataset for 100 iterations, with a minimum of five landmarks retained for each module. We further analysed the landmark-only dataset with the same partitions, with the exception of the occipital condyle, which was defined by only two landmarks. The correlation patterns for both subsets are consistent with the results from the full dataset (Fig. S9), supporting that the cranial modules identified in this study are robust to dataset dimensionality.

With the characterization of highly disparate morphologies, another potential issue with the shape data is that Procrustes alignment may artifactually spread the variance across the entire skull, such that comparisons of Procrustes coordinates deviate from biological signal. For instance, analysis of modularity and within-partition variation in this study are based on shape coordinates from single, global alignment of the entire skull. As such, the differences in Procrustes coordinates could be due to changes in relative position of the partition to the rest of the skull and not necessarily due to changes in shape within the partition. To optimize the interpretability of results by retaining the spatial relationships of landmark points, we did not perform analyses on Procrustes coordinates from separate, local alignments within each region or module (29). Nevertheless, the effect of this artifact must be addressed. First, the use of high-dimensional morphometric data with sliding semi-landmarks that densely captures the morphology of structures across the skull will mitigate the “Pinocchio effect” (30), where variance in isolated landmark points positioned at the extremes of structures (e.g., anterior tip of the rostrum) is redistributed across other landmark points. Yet, certain regions, such as the jaw joint, may be susceptible to the alignment artifact. To evaluate its impact, we performed a two-block partial least squares analysis (31) within each module to confirm the correspondence between globally and locally aligned datasets. With the exception of the jugal, all partitions showed correlation coefficients  $R > 0.7$  and  $P < 0.001$  (Table S12). In addition, changes in relative position of partitions is biologically meaningful information that we want to characterize in our analyses.

## References

1. Hipsley CA, Müller J (2014) Relict endemism of extant Rhineuridae (Amphisbaenia): Testing for phylogenetic niche conservatism in the fossil record. *Anat Rec* 297:473–481.
2. Felice RN, Goswami A (2018) Developmental origins of mosaic evolution in the avian cranium. *Proc Natl Acad Sci* 115:555–560.
3. Wiley DF, et al. (2005) Landmark Editor. Available at: [graphics.idav.ucdavis.edu/research?EvoMorph](http://graphics.idav.ucdavis.edu/research?EvoMorph).
4. R Core Development Team (2017) R: A language and environment for statistical computing. Available at: <https://www.r-project.org>.
5. Botton-Divet L, Houssaye A, Herrel A, Fabre A-C, Cornette R (2015) Tools for quantitative form description; an evaluation of different software packages for semi-landmark analysis. *PeerJ* 3:e1417.
6. Schlager S (2017) Morpho and Rvcg - shape analysis in R: R-packages for geometric morphometrics, shape analysis and surface manipulations. *Statistical Shape and Deformation Analysis: Methods, Implementation and Applications*, eds Zhen G, Li S, Szekely G (Academic Press), pp 217–256.
7. Cignoni P, Corsini M, Ranzuglia G (2008) Meshlab: an open-source 3d mesh processing system. *ERCIM News* 73:45–46.
8. Schlager S, Profico A, Di Vincenzo F, Manzi G (2018) Retrodeformation of fossil specimens based on 3D bilateral semi-landmarks: Implementation in the R package “Morpho.” *PLoS ONE* 13(3):e0194073.
9. Cardini A (2016) Lost in the other half: Improving accuracy in geometric morphometric analyses of one side of bilaterally symmetric structures. *Syst Biol* 65:1096–1106.

10. Cardini A (2017) Left, right or both? Estimating and improving accuracy of one-side-only geometric morphometric analyses of cranial variation. *J Zool Syst Evol Res* 55:1–10.
11. Lucas T, Goswami A (2017) paleomorph: geometric morphometric tools for paleobiology.
12. Adams DC, Otárola-Castillo E (2013) geomorph: An R Package for the collection and analysis of geometric morphometric shape data. *Methods Ecol Evol* 4:393–399.
13. Adams AD, Collyer M, Otárola-Castillo E, Sherratt E, Adams MD (2017) Package ‘geomorph.’
14. Zheng Y, Wiens JJ (2016) Combining phylogenomic and supermatrix approaches, and a time-calibrated phylogeny for squamate reptiles (lizards and snakes) based on 52 genes and 4162 species. *Mol Phylogenet Evol* 94:537–547.
15. Brusatte SL, Lloyd GT, Wang SC, Norell MA (2014) Gradual assembly of avian body plan culminated in rapid rates of evolution across the dinosaur-bird transition. *Curr Biol* 24(20):2386–2392.
16. Reeder TW, et al. (2015) Integrated analyses resolve conflicts over squamate reptile phylogeny and reveal unexpected placements for fossil taxa. *PLoS ONE* 10(3):e0118199.
17. Conrad J (2008) Phylogeny and systematics of Squamata (Reptilia) based on morphology. *Bull Am Museum Nat Hist* 310:1–182.
18. Gauthier JA, Kearney M, Maisano JA, Rieppel O, Behlke ADB (2012) Assembling the squamate tree of life: Perspectives from the phenotype and the fossil record. *Bull Peabody Museum Nat Hist* 53:3–308.
19. Caldwell MW, Lee MSY (1997) A snake with legs from the marine Cretaceous of the Middle East. *Nature* 386:705–709.
20. Lee MSY, Caldwell MW (1998) Anatomy and relationships of *Pachyrhachis problematicus*, a primitive snake with hindlimbs. *Philos Trans R Soc B Biol Sci* 353(1375):1521–1552.
21. Lee MSY, Caldwell MW (2000) Adriosaur and the affinities of mosasaurs, dolichosaurs, and snakes. *J Paleontol* 74:915–937.
22. Simões TR, Caldwell MW, Palci A, Nydam RL (2017) Giant taxon-character matrices: Quality of character constructions remains critical regardless of size. *Cladistics* 33:198–219.
23. Meade A, Pagel M (2016) BayesTraitsV3. Available at: <http://www.evolution.rdg.ac.uk/BayesTraitsV3.0.1/BayesTraitsV3.0.1.html>.
24. Adams DC, Collyer ML (2018) Multivariate phylogenetic comparative methods: Evaluations, comparisons, and recommendations. *Syst Biol* 67:14–31.
25. Xie W, Lewis PO, Fan Y, Kuo L, Chen MH (2011) Improving marginal likelihood estimation for Bayesian phylogenetic model selection. *Syst Biol* 60:150–160.
26. Denton JSS, Adams DC (2015) A new phylogenetic test for comparing multiple high-dimensional evolutionary rates suggests interplay of evolutionary rates and modularity in lanternfishes (Myctophiformes; Myctophidae). *Evolution* 69:2425–2440.
27. Blackburn DG (2006) Squamate reptiles as model organisms for the evolution of viviparity. *Herpetol Monogr* 20:131–146.
28. Collyer ML, Sekora DJ, Adams DC (2015) A method for analysis of phenotypic change for phenotypes described by high-dimensional data. *Heredity (Edinb)* 115(4):357–365.
29. Bookstein FL, et al. (2003) Cranial integration in *Homo*: Singular warps analysis of the midsagittal plane in ontogeny and evolution. *J Hum Evol* 44:167–187.
30. Chapman RE (1990) Conventional Procrustes approaches. *Proceedings of the Michigan Morphometrics Workshop* (University of Michigan Museum of Zoology, Ann Arbor), pp 251–267.
31. Rohlf FJ, Corti M (2000) Use of two-block partial least-squares to study covariation in shape. *Syst Biol* 49:740–753.
32. Goswami A, Finarelli JA (2016) EMMLi: A maximum likelihood approach to the analysis of modularity. *Evolution* 70:1622–1637.
33. Watanabe A (2018) How many landmarks are enough to characterize shape and size variation? *PLoS ONE* 13(6):e0198341.

**Table S1. Landmark (LM), curve semi-landmarks (curve sLMs), and surface semi-landmark (surface sLMs) scheme used in this study.** LMs and sLM on the jugal and surface sLMs on the pterygoid and palatine were removed for snake and pooled squamate datasets. Combined extant and extinct dataset includes premaxilla, maxilla, frontal, parietal, and supra-otoccipital partitions.

| Partition                    | No. surface sLMs | LM | Landmark definition                                          | No. curve sLMs |
|------------------------------|------------------|----|--------------------------------------------------------------|----------------|
| Premaxilla                   | 39               | 1  | Right anterior-most median point of premaxilla               | 1→2: 10        |
|                              |                  | 2  | Right posterior-most median point of premaxilla              | 2→3: 10        |
|                              |                  | 3  | Right dorsal point on ventral premaxilla-maxilla suture      | 3→4: 5         |
|                              |                  | 4  | Right ventral point on ventral premaxilla-maxilla suture     | 4→1: 10        |
| Nasal                        | 42               | 5  | Right anteromedial-most point of nasal                       | 5→6: 10        |
|                              |                  | 6  | Right posteromedial most point of nasal                      | 6→7: 10        |
|                              |                  | 7  | Right posterolateral most point of nasal                     | 7→8: 10        |
|                              |                  | 8  | Right anterolateral point that meets the naris               | 8→5: 10        |
| Maxilla                      | 92               | 9  | Right premaxilla-maxilla-naris junction on maxilla           | 9→10: 10       |
|                              |                  | 10 | Right posteromedial point of the maxilla                     | 10→11: 20      |
|                              |                  | 11 | Right posterior-most point of the maxilla                    | 11→12: 20      |
|                              |                  | 12 | Right anteroventral point of maxilla-nasal suture            | 12→13: 5       |
|                              |                  | 13 | Right anterodorsal point of maxilla-nasal suture             | 13→9: 10       |
| Jugal                        | 31               | 14 | Right anterior jugal-orbital margin junction                 | 14→15: 20      |
|                              |                  | 15 | Right posterodorsal point of the jugal                       | 15→16: 20      |
|                              |                  | 16 | Right posterior-most point of jugal                          | 16→14: 20      |
| Frontal                      | 86               | 17 | Right anteromedial point of frontal                          | 17→18: 10      |
|                              |                  | 18 | Right posterior medial-most point of frontal                 | 18→19: 10      |
|                              |                  | 19 | Right posterolateral point of frontal meeting parietal       | 19→20: 10      |
|                              |                  | 20 | Right anterolateral corner of frontal                        | 20→17: 10      |
| Parietal                     | 34               | 21 | Right anterior median point of parietal                      | 21→22: 20      |
|                              |                  | 22 | Right posterior median point                                 | 22→23: 10      |
|                              |                  | 23 | Right posterolateral point                                   | 23→24: 20      |
|                              |                  | 24 | Right anterolateral point meeting frontal                    | 24→21: 10      |
| Squamosal                    | 19               | 25 | Right anterior-most point                                    | 25→26: 10      |
|                              |                  | 26 | Right posterodorsal (medial) most point                      | 26→27: 10      |
|                              |                  | 27 | Right posteroventral (lateral) most point                    | 27→25: 10      |
| Jaw Joint                    | 18               | 28 | Right anteromedial point of mandibular articular process     | 28→29: 5       |
|                              |                  | 29 | Right posterolateral point of mandibular articular process   | 29→30: 5       |
|                              |                  | 30 | Right posteromedial point of mandibular articular surface    | 30→31: 5       |
|                              |                  | 31 | Right anterolateral point of mandibular articular surface    | 31→28: 5       |
| Supra-Otooccipital           | 67               | 32 | Right dorsal median point of supraoccipital                  | 32→33: 10      |
|                              |                  | 33 | Right dorsal median point of foramen magnum                  | 33→34: 10      |
|                              |                  | 34 | Right ventral median point of foramen magnum (basion)        | 34→35: 10      |
|                              |                  | 35 | Right ventrolateral most point of oto-basioccipital suture   | 35→36: 10      |
|                              |                  | 36 | Right ventral otoccipital-squamosal junction                 | 36→32: 20      |
| Basioccipital + Basisphenoid | 58               | 37 | Right median basioccipital-occipital condyle junction        | 37→38: 20      |
|                              |                  | 38 | Right anterior-most median point of (basi)sphenoid           | 38→39: 10      |
|                              |                  | 39 | Right medial sphenoid-ptyerygoid junction or process         | 39→40: 20      |
|                              |                  | 40 | Right postero-lateral most point of oto-basioccipital suture | 40→37: 10      |
| Pterygoid                    | 39               | 41 | Right medial anteroventral point of pterygoid                | 41→42: 10      |
|                              |                  | 42 | Right posterior-most point of pterygoid                      | 42→43: 20      |
|                              |                  | 43 | Right lateral anteroventral point of pterygoid               | 43→41: 20      |
| Palatine                     | 33               | 44 | Right posteroventro-medial point of palate                   | 44→45: 10      |
|                              |                  | 45 | Right posteroventro-lateral point of palate                  | 45→46: 20      |
|                              |                  | 46 | Right medial ventral palate-maxilla junction                 | 46→47: 10      |
|                              |                  | 47 | Right lateral ventral palate-maxilla junction                | 47→44: 20      |
| —                            | —                | 48 | Right ventral premaxilla-tooth row junction                  | —              |
| Occipital condyle            | 22               | —  | —                                                            | 34→37: 5       |
|                              |                  | —  | —                                                            | 37→34: 10      |

**Table S2. List of specimens sampled in this study.** Taxonomic designation based on Zheng and Wiens (14). Source signifies whether the skull reconstructions are based on computed tomography (CT) data from the Digital Morphology (DigiMorph) database (digimorph.org), surface data collected by Go!Scan scanner, MorphoSource (morphosource.org), computed tomography (CT) data collected by authors of this study (i.e., Herrel CT by A. H., Müller CT by J. M., and MfN CT by A.W. at Museum für Naturkunde). ‘Original label’ indicates the original taxonomic assignment given to the specimen. ‘Mirrored’ denotes reconstructions that were left-right mirrored due to damage or missing bones on the right side. *Sphenodon* was not included in analyses with the exception of morphospaces.

| Higher Taxon    | Family          | Genus                 | species                    | Specimen No.       | Source    | Original label         | Mirrored |
|-----------------|-----------------|-----------------------|----------------------------|--------------------|-----------|------------------------|----------|
| Rhynchocephalia | Sphenodontidae  | <i>Sphenodon</i>      | <i>punctatus</i>           | YPM 9194           | DigiMorph |                        | .        |
| Iguania         | Dactyloidae     | <i>Anolis</i>         | <i>carolinensis</i>        | FMNH 242298        | DigiMorph |                        |          |
| Iguania         | Polychrotidae   | <i>Polychrus</i>      | <i>marmoratus</i>          | FMNH 42501         | DigiMorph |                        |          |
| Iguania         | Leiosauridae    | <i>Urostrophus</i>    | <i>vautieri</i>            | FMNH 83576         | DigiMorph |                        |          |
| Iguania         | Leiosauridae    | <i>Pristidactylus</i> | <i>torquatus</i>           | FMNH 206964        | DigiMorph |                        |          |
| Iguania         | Leiosauridae    | <i>Leiosaurus</i>     | <i>catamarcensis</i>       | CM 65003           | DigiMorph |                        |          |
| Iguania         | Corytophanidae  | <i>Basiliscus</i>     | <i>basiliscus</i>          | FMNH 165622        | DigiMorph |                        |          |
| Iguania         | Corytophanidae  | <i>Corytophanes</i>   | <i>cristatus</i>           | FMNH 69227         | DigiMorph |                        |          |
| Iguania         | Crotaphytidae   | <i>Crotaphytus</i>    | <i>collaris</i>            | FMNH 48667         | DigiMorph |                        |          |
| Iguania         | Crotaphytidae   | <i>Gambelia</i>       | <i>wislizenii</i>          | YPM 14380          | DigiMorph |                        |          |
| Iguania         | Crotaphytidae   | <i>Gambelia</i>       | <i>corona</i> <sup>†</sup> | LACM 42880         | Go!Scan   |                        |          |
| Iguania         | Iguanidae       | <i>Amblyrhynchus</i>  | <i>cristatus</i>           | MCZ R123791        | Herrel CT |                        |          |
| Iguania         | Iguanidae       | <i>Ctenosaura</i>     | <i>pectinata</i>           | Chris Bell Private | DigiMorph |                        |          |
| Iguania         | Iguanidae       | <i>Conolophus</i>     | <i>subcristatus</i>        | MCZ R123792        | Herrel CT |                        |          |
| Iguania         | Iguanidae       | <i>Brachylophus</i>   | <i>fasciatus</i>           | FMNH 210158        | DigiMorph |                        |          |
| Iguania         | Iguanidae       | <i>Dipsosaurus</i>    | <i>dorsalis</i>            | YPM 14376          | DigiMorph |                        |          |
| Iguania         | Hoplocercidae   | <i>Enyalioides</i>    | <i>laticeps</i>            | FMNH 206132        | DigiMorph |                        |          |
| Iguania         | Hoplocercidae   | <i>Morunasaurus</i>   | <i>annularis</i>           | USNM 200767        | DigiMorph |                        |          |
| Iguania         | Opluridae       | <i>Oplurus</i>        | <i>cyclurus</i>            | YPM 12861          | DigiMorph |                        | .        |
| Iguania         | Opluridae       | <i>Chalarodon</i>     | <i>madagascariensis</i>    | YPM 12866          | DigiMorph |                        |          |
| Iguania         | Phrynosomatidae | <i>Phrynosoma</i>     | <i>platyrhinos</i>         | TNHC 18496         | DigiMorph |                        |          |
| Iguania         | Phrynosomatidae | <i>Sceloporus</i>     | <i>variabilis</i>          | FMNH 122866        | DigiMorph |                        |          |
| Iguania         | Phrynosomatidae | <i>Petrosaurus</i>    | <i>mearnsi</i>             | FMNH 8431          | DigiMorph |                        |          |
| Iguania         | Phrynosomatidae | <i>Uma</i>            | <i>scoparia</i>            | FMNH 1203          | DigiMorph |                        |          |
| Iguania         | Phrynosomatidae | <i>Uta</i>            | <i>stansburiana</i>        | FMNH 213914        | DigiMorph |                        |          |
| Iguania         | Leiocephalidae  | <i>Leiocephalus</i>   | <i>barahonensis</i>        | USNM 260564        | DigiMorph | <i>L. barohonensis</i> |          |

| Higher Taxon | Family            | Genus                   | species                 | Specimen No. | Source       | Original Label                   | Mirrored |
|--------------|-------------------|-------------------------|-------------------------|--------------|--------------|----------------------------------|----------|
| Iguania      | Liolaemidae       | <i>Liolaemus</i>        | <i>bellii</i>           | MCZ 125659   | DigiMorph    |                                  |          |
| Iguania      | Liolaemidae       | <i>Phymaturus</i>       | <i>palluma</i>          | FMNH 209123  | DigiMorph    |                                  |          |
| Iguania      | Tropiduridae      | <i>Plica</i>            | <i>plica</i>            | FMNH 81451   | DigiMorph    |                                  |          |
| Iguania      | Tropiduridae      | <i>Stenocercus</i>      | <i>guentheri</i>        | FMNH 27674   | DigiMorph    |                                  |          |
| Iguania      | Tropiduridae      | <i>Uranoscodon</i>      | <i>superciliosus</i>    | YPM 12871    | DigiMorph    |                                  | •        |
| Iguania      | Agamidae          | <i>Leiolepis</i>        | <i>belliana</i>         | USNM 205722  | DigiMorph    | <i>U. aegyptius</i>              |          |
| Iguania      | Agamidae          | <i>Uromastyx</i>        | <i>aegyptia</i>         | FMNH 78661   | DigiMorph    |                                  |          |
| Iguania      | Agamidae          | <i>Draco</i>            | <i>quinquefasciatus</i> | FMNH 221322  | DigiMorph    |                                  |          |
| Iguania      | Agamidae          | <i>Agama</i>            | <i>agama</i>            | FMNH 47531   | DigiMorph    |                                  |          |
| Iguania      | Agamidae          | <i>Calotes</i>          | <i>emma</i>             | FMNH 252264  | DigiMorph    |                                  |          |
| Iguania      | Agamidae          | <i>Pogona</i>           | <i>vitticeps</i>        | ROM 22699    | DigiMorph    |                                  |          |
| Iguania      | Chamaeleonidae    | <i>Brookesia</i>        | <i>brygooi</i>          | FMNH 260015  | DigiMorph    | <i>Rhampholeon brevicaudatus</i> |          |
| Iguania      | Chamaeleonidae    | <i>Rieppoleon</i>       | <i>brevicaudata</i>     | FLMNH H65355 | MorphoSource | <i>R. brevicaudatus</i>          |          |
| Iguania      | Chamaeleonidae    | <i>Chamaeleo</i>        | <i>calyptratus</i>      | TNHC 62768   | DigiMorph    |                                  |          |
| Gekkota      | Eublepharidae     | <i>Eublepharis</i>      | <i>macularius</i>       | CM 67524     | DigiMorph    |                                  |          |
| Gekkota      | Eublepharidae     | <i>Aeluroscalabotes</i> | <i>felinus</i>          | FMNH 146141  | DigiMorph    |                                  |          |
| Gekkota      | Eublepharidae     | <i>Coleonyx</i>         | <i>variiegatus</i>      | YPM 14383    | DigiMorph    | <i>Phyllurus cornutus</i>        |          |
| Gekkota      | Carphodactylidae  | <i>Saltuarius</i>       | <i>cornutus</i>         | FMNH 57503   | DigiMorph    |                                  |          |
| Gekkota      | Carphodactylidae  | <i>Nephrurus</i>        | <i>levis</i>            | YPM 12868    | DigiMorph    |                                  |          |
| Gekkota      | Gekkonidae        | <i>Gekko</i>            | <i>gecko</i>            | FMNH 186818  | DigiMorph    |                                  |          |
| Gekkota      | Gekkonidae        | <i>Phelsuma</i>         | <i>lineata</i>          | FMNH 260100  | DigiMorph    |                                  |          |
| Gekkota      | Gekkonidae        | <i>Uroplatus</i>        | <i>lineatus</i>         | ZMB 70059    | MfN CT       |                                  |          |
| Gekkota      | Gekkonidae        | <i>Lygodactylus</i>     | <i>picturatus</i>       | ZMB 1553     | MfN CT       | <i>Cyrtodactylus</i>             |          |
| Gekkota      | Gekkonidae        | <i>Hemidactylus</i>     | <i>frenatus</i>         | ZMB 8568     | MfN CT       |                                  |          |
| Gekkota      | Gekkonidae        | <i>Hemidactylus</i>     | <i>mabouia</i>          | ZMB 15541    | MfN CT       | <i>Hemidactylus mabouia</i>      |          |
| Gekkota      | Gekkonidae        | <i>Gehyra</i>           | <i>multilata</i>        | ZMB 21420    | MfN CT       |                                  |          |
| Gekkota      | Gekkonidae        | <i>Ptychozoon</i>       | <i>kuhlii</i>           | MCZ R166275  | Herrel CT    | <i>P. kuhlii</i>                 |          |
| Gekkota      | Diplodactylidae   | <i>Strophurus</i>       | <i>ciliaris</i>         | FMNH 215488  | DigiMorph    | <i>Diplodactylus ciliaris</i>    |          |
| Gekkota      | Diplodactylidae   | <i>Rhacodactylus</i>    | <i>auriculatus</i>      | CAS 205486   | DigiMorph    |                                  |          |
| Gekkota      | Sphaerodactylidae | <i>Gonatodes</i>        | <i>albogularis</i>      | FMNH 55929   | DigiMorph    |                                  | •        |
| Gekkota      | Sphaerodactylidae | <i>Teratoscincus</i>    | <i>przewalskii</i>      | CAS 171013   | DigiMorph    |                                  |          |
| Gekkota      | Pygopodidae       | <i>Delma</i>            | <i>borea</i>            | USNM 128679  | DigiMorph    |                                  |          |
| Gekkota      | Pygopodidae       | <i>Lialis</i>           | <i>burtonis</i>         | FMNH 166958  | DigiMorph    |                                  |          |

| Higher Taxon | Family         | Genus                              | species                       | Specimen No.   | Source    | Original Label                  | Mirrored                 |
|--------------|----------------|------------------------------------|-------------------------------|----------------|-----------|---------------------------------|--------------------------|
| Scincomorpha | Scincidae      | <i>Acontias</i>                    | <i>percivali</i>              | YPM 12687      | DigiMorph | <i>Typhlosaurus aurantiacus</i> |                          |
| Scincomorpha | Scincidae      | <i>Acontias</i>                    | <i>plumbeus</i>               | ZMB 3936       | MfN CT    |                                 |                          |
| Scincomorpha | Scincidae      | <i>Feylinia</i>                    | <i>polylepis</i>              | FMNH 120968    | DigiMorph |                                 |                          |
| Scincomorpha | Scincidae      | <i>Eugongylus</i>                  | <i>rufescens</i>              | FMNH 142306    | DigiMorph |                                 |                          |
| Scincomorpha | Scincidae      | <i>Sphenomorphus</i>               | <i>solomonis</i>              | CAS 110021     | DigiMorph |                                 |                          |
| Scincomorpha | Scincidae      | <i>Tiliqua</i>                     | <i>scincoides</i>             | FMNH 57518     | DigiMorph |                                 |                          |
| Scincomorpha | Scincidae      | <i>Scincopus</i>                   | <i>fasciatus</i>              | YPM 12689      | DigiMorph |                                 | <i>Eumeces fasciatus</i> |
| Scincomorpha | Scincidae      | <i>Scincus</i>                     | <i>scincus</i>                | YPM 12686      | DigiMorph |                                 |                          |
| Scincomorpha | Scincidae      | <i>Brachymeles</i>                 | <i>gracilis</i>               | FMNH 52642     | DigiMorph |                                 |                          |
| Scincomorpha | Scincidae      | <i>Amphiglossus</i>                | <i>splendidus</i>             | FMNH 72807     | DigiMorph |                                 |                          |
| Scincomorpha | Scincidae      | <i>Trachylepis</i>                 | <i>quinquetaeniata</i>        | YPM 12688      | DigiMorph | <i>Mabuya quinquetaeniata</i>   |                          |
| Scincomorpha | Cordylidae     | <i>Smaug</i>                       | <i>mossambicus</i>            | YPM 12670      | DigiMorph | <i>Cordylus mossambicus</i>     |                          |
| Scincomorpha | Cordylidae     | <i>Chamaesaura</i>                 | <i>anguina</i>                | ZMB56421       | Müller CT |                                 | •                        |
| Scincomorpha | Cordylidae     | <i>Platysaurus</i>                 | <i>capensis</i>               | YPM 12669      | DigiMorph | <i>P. imperator</i>             |                          |
| Scincomorpha | Gerrhosauridae | <i>Cordylosaurus</i>               | <i>subtesselatus</i>          | FMNH 74082     | DigiMorph |                                 |                          |
| Scincomorpha | Gerrhosauridae | <i>Zonosaurus</i>                  | <i>ornatus</i>                | YPM 12671      | DigiMorph |                                 |                          |
| Scincomorpha | Xantusiidae    | <i>Cricosaura</i>                  | <i>typica</i>                 | USNM 547842    | DigiMorph |                                 |                          |
| Scincomorpha | Xantusiidae    | <i>Xantusia</i>                    | <i>vigilis</i>                | LACM 123671    | DigiMorph |                                 |                          |
| Amphisbaenia | Amphisbaenidae | <i>Amphisbaena</i>                 | <i>fuliginosa</i>             | FMNH 195924    | DigiMorph |                                 |                          |
| Amphisbaenia | Amphisbaenidae | <i>Monopeltis</i>                  | <i>capensis</i>               | ZMB 25441      | Müller CT | <i>M. anchieta</i>              |                          |
| Amphisbaenia | Amphisbaenidae | <i>Chirindia</i>                   | <i>swynnertoni</i>            | FMNH265233     | Müller CT | <i>C. rondoense</i>             |                          |
| Amphisbaenia | Amphisbaenidae | <i>Geocalamus</i>                  | <i>acutus</i>                 | FMNH 262014    | DigiMorph |                                 |                          |
| Amphisbaenia | Blanidae       | <i>Blanus</i>                      | <i>cinereus</i>               | MCZ R29967     | Herrel CT |                                 |                          |
| Amphisbaenia | Bipedidae      | <i>Bipes</i>                       | <i>biporus</i>                | CAS 126478     | DigiMorph |                                 |                          |
| Amphisbaenia | Rhineuridae    | <i>Rhineura</i>                    | <i>floridana</i>              | FMNH 31774     | DigiMorph |                                 |                          |
| Amphisbaenia | Rhineuridae    | <i>Hyporhina</i> <sup>†</sup>      | <i>antiqua</i> <sup>†</sup>   | YPM 11390      | Müller CT |                                 |                          |
| Amphisbaenia | Rhineuridae    | <i>Spathorhynchus</i> <sup>†</sup> | <i>fossorium</i> <sup>†</sup> | USNM 26318     | Müller CT |                                 |                          |
| Amphisbaenia | Trogonophiidae | <i>Diplometopon</i>                | <i>zarudnyi</i>               | FMNH 64429     | Müller CT |                                 | •                        |
| Amphisbaenia | Trogonophiidae | <i>Trogonophis</i>                 | <i>wiegmanni</i>              | FMNH 109462    | DigiMorph |                                 |                          |
| –            | –              | <i>Slavoia</i> <sup>†</sup>        | <i>darevskii</i> <sup>†</sup> | ZPAL MgR-I.112 | Go!Scan   |                                 |                          |
| Lacertoidea  | Lacertidae     | <i>Gallotia</i>                    | <i>galloti</i>                | ZMB955         | Müller CT |                                 |                          |
| Lacertoidea  | Lacertidae     | <i>Atlantolacerta</i>              | <i>andreanskyi</i>            | ZFMK8751       | Müller CT |                                 |                          |

| Higher Taxon | Family                            | Genus                               | species                          | Specimen No.    | Source     | Original Label                  | Mirrored |
|--------------|-----------------------------------|-------------------------------------|----------------------------------|-----------------|------------|---------------------------------|----------|
| Lacertoidea  | Lacertidae                        | <i>Takydromus</i>                   | <i>sexlineatus</i>               | FMNH 255513     | DigiMorph  | <i>T. ocellatus</i>             |          |
| Lacertoidea  | Lacertidae                        | <i>Holaspis</i>                     | <i>guentheri</i>                 | MCZ 35520       | Herrel CT  |                                 |          |
| Lacertoidea  | Lacertidae                        | <i>Nucras</i>                       | <i>tessellata</i>                | MCZ R17359      | Herrel CT  | <i>N. tessellata</i>            |          |
| Lacertoidea  | Lacertidae                        | <i>Lacerta</i>                      | <i>viridis</i>                   | YPM 12858       | DigiMorph  |                                 |          |
| Lacertoidea  | Teiidae                           | <i>Teius</i>                        | <i>teyou</i>                     | FMNH 10873      | DigiMorph  |                                 |          |
| Lacertoidea  | Teiidae                           | <i>Ameiva</i>                       | <i>ameiva</i>                    | MCZ 131787      | Herrel CT  |                                 |          |
| Lacertoidea  | Teiidae                           | <i>Callopistes</i>                  | <i>maculatus</i>                 | FMNH 53726      | DigiMorph  |                                 |          |
| Lacertoidea  | Teiidae                           | <i>Tupinambis</i>                   | <i>teguixin</i>                  | FMNH 22416      | DigiMorph  |                                 |          |
| Lacertoidea  | Polyglyphanodontidae <sup>†</sup> | <i>Polyglyphanodon</i> <sup>†</sup> | <i>sternbergi</i> <sup>†</sup>   | USNM 16588      | Go!Scan    |                                 |          |
| Lacertoidea  | Gymnophthalmidae                  | <i>Alopoglossus</i>                 | <i>copii</i>                     | ZMB 9986        | MfN CT     |                                 |          |
| Lacertoidea  | Gymnophthalmidae                  | <i>Bachia</i>                       | <i>flavens</i>                   | ZMB 8585        | MfN CT     | <i>B. cophias</i>               | •        |
| Lacertoidea  | Gymnophthalmidae                  | <i>Gymnophthalmus</i>               | <i>leucomystax</i>               | ZMB 28660A      | MfN CT     |                                 |          |
| Lacertoidea  | Gymnophthalmidae                  | <i>Pholidobolus</i>                 | <i>montium</i>                   | FMNH 197865     | DigiMorph  |                                 |          |
| Lacertoidea  | Gymnophthalmidae                  | <i>Colobosaura</i>                  | <i>modesta</i>                   | USNM 341978     | DigiMorph  |                                 |          |
| Anguimorpha  | Anguidae                          | <i>Elgaria</i>                      | <i>multicarinata</i>             | FMNH 23601      | DigiMorph  |                                 |          |
| Anguimorpha  | Diploglossidae                    | <i>Celestus</i>                     | <i>enneagrammus</i>              | FMNH 108860     | DigiMorph  |                                 |          |
| Anguimorpha  | Anniellidae                       | <i>Anniella</i>                     | <i>pulchra</i>                   | FMNH 130481     | DigiMorph  |                                 |          |
| Anguimorpha  | Shinisauridae                     | <i>Shinisaurus</i>                  | <i>crocodilurus</i>              | FMNH 215541     | DigiMorph  |                                 |          |
| Anguimorpha  | Xenosauridae                      | <i>Xenosaurus</i>                   | <i>grandis</i>                   | FMNH 123702     | DigiMorph  |                                 |          |
| Anguimorpha  | Helodermatidae                    | <i>Heloderma</i>                    | <i>horridum</i>                  | TNHC 64380      | DigiMorph  |                                 |          |
| Anguimorpha  | —                                 | <i>Estesia</i> <sup>†</sup>         | <i>mongoliensis</i> <sup>†</sup> | AMNH FARB 29072 | Go!Scan    |                                 |          |
| Anguimorpha  | Varanidae                         | <i>Varanus</i>                      | <i>salvator</i>                  | FMNH 35144      | DigiMorph  |                                 |          |
| Anguimorpha  | Lanthanotidae                     | <i>Lanthanotus</i>                  | <i>borneensis</i>                | YPM 6057        | DigiMorph  |                                 |          |
| Mosasauria   | Mosasauridae <sup>†</sup>         | <i>Plotosaurus</i> <sup>†</sup>     | <i>bennisoni</i> <sup>†</sup>    | UCMP 32778      | DigiMorph  |                                 |          |
| --           | Dibamidae                         | <i>Dibamus</i>                      | <i>novaeguineae</i>              | ZMB5027A        | Müller CT  | <i>D. martensii</i>             |          |
| --           | Dibamidae                         | <i>Anelytropsis</i>                 | <i>papillosus</i>                | FMNH 100410     | DigiMorph  |                                 |          |
| Typhlopoidea | Leptotyphlopidae                  | <i>Rena</i>                         | <i>dulcis</i>                    | TNHC 60638      | DigiMorph  | <i>Leptotyphlops dulcis</i>     | •        |
| Typhlopoidea | Anomalepididae                    | <i>Liotyphlops</i>                  | <i>albirostris</i>               | FMNH 216257     | DigiMorph  |                                 |          |
| Typhlopoidea | Typhlopidae                       | <i>Indotyphlops</i>                 | <i>braminus</i>                  | MCZ R-182621    | DigiMorph  | <i>Liotyphlops braminus</i>     |          |
| Typhlopoidea | Typhlopidae                       | <i>Afrotyphlops</i>                 | <i>schlegelii</i>                | ZMB 6884        | MfN CT     | <i>Rhinotyphlops schlegelii</i> |          |
| Booidea      | Anomochilidae                     | <i>Anomochilus</i>                  | <i>leonardi</i>                  | FRIM 0026       | DigiMorph  |                                 |          |
| Booidea      | Cylindrophiiidae                  | <i>Cylindrophis</i>                 | <i>ruffus</i>                    | FMNH 60958      | DigiMorph, |                                 |          |

| Higher Taxon   | Family         | Genus               | species               | Specimen No. | Source       | Original Label                | Mirrored |
|----------------|----------------|---------------------|-----------------------|--------------|--------------|-------------------------------|----------|
| Booidea        | Aniliidae      | <i>Anilius</i>      | <i>scytale</i>        | USNM 204078  | DigiMorph    |                               |          |
| Booidea        | Xenopeltidae   | <i>Xenopeltis</i>   | <i>unicolor</i>       | FMNH 148900  | DigiMorph    |                               |          |
| Booidea        | Loxocemidae    | <i>Loxocemus</i>    | <i>bicolor</i>        | FMNH 104800  | DigiMorph    |                               |          |
| Booidea        | Lamprophiidae  | <i>Lycophidion</i>  | <i>capense</i>        | FMNH 58322   | DigiMorph    |                               |          |
| Booidea        | Lamprophiidae  | <i>Boaedon</i>      | <i>fuliginosus</i>    | FMNH 62248   | DigiMorph    | <i>Lamprophis fuliginosus</i> |          |
| Booidea        | Pythonidae     | <i>Python</i>       | <i>mohurus</i>        | TNHC 62769   | DigiMorph    |                               |          |
| Booidea        | Pythonidae     | <i>Aspidites</i>    | <i>melanocephalus</i> | FMNH 97055   | DigiMorph    |                               |          |
| Booidea        | Boidae         | <i>Candoia</i>      | <i>carinata</i>       | ZMB 14571    | Müller CT    |                               |          |
| Booidea        | Boidae         | <i>Boa</i>          | <i>constrictor</i>    | FMNH 31182   | DigiMorph    |                               | •        |
| Booidea        | Boidae         | <i>Epicrates</i>    | <i>cenchrus</i>       | USNM 59918   | DigiMorph    | <i>E. striatus</i>            |          |
| Booidea        | Boidae         | <i>Eryx</i>         | <i>colubrinus</i>     | FMNH 63117   | DigiMorph    |                               |          |
| Booidea        | Boidae         | <i>Lichanura</i>    | <i>trivirgata</i>     | YPM 12869    | DigiMorph    |                               |          |
| Booidea        | Boidae         | <i>Ungaliophis</i>  | <i>continentalis</i>  | UTA 50569    | DigiMorph    |                               |          |
| Booidea        | Calabariidae   | <i>Calabaria</i>    | <i>reinhardtii</i>    | FMNH 117833  | DigiMorph    | <i>C. reinhardtii</i>         |          |
| Booidea        | Tropidophiidae | <i>Trachyboa</i>    | <i>boulengeri</i>     | FMNH 131266  | DigiMorph    |                               |          |
| Booidea        | Tropidophiidae | <i>Tropidophis</i>  | <i>haetianus</i>      | TNHC 64040   | DigiMorph    |                               |          |
| Booidea        | Bolyeridae     | <i>Casarea</i>      | <i>dussumieri</i>     | UMMZ 190285  | DigiMorph    |                               |          |
| Booidea        | Xenophidiidae  | <i>Xenophidion</i>  | <i>schaeferi</i>      | ZMB 50534    | Müller CT    |                               |          |
| Acrochordoidea | Acrochordidae  | <i>Acrochordus</i>  | <i>granulatus</i>     | FMNH 201350  | DigiMorph    |                               |          |
| Colubroidea    | Xenodermatidae | <i>Xenodermus</i>   | <i>javanicus</i>      | FMNH 158613  | DigiMorph    |                               |          |
| Colubroidea    | Viperidae      | <i>Azemiops</i>     | <i>feae</i>           | FMNH 218627  | DigiMorph    |                               |          |
| Colubroidea    | Viperidae      | <i>Bothrops</i>     | <i>asper</i>          | FMNH 31162   | DigiMorph    |                               |          |
| Colubroidea    | Viperidae      | <i>Trimeresurus</i> | <i>albolabris</i>     | ZMB 33921    | MfN CT       |                               |          |
| Colubroidea    | Viperidae      | <i>Lachesis</i>     | <i>stenophrys</i>     | UMMZ H-76715 | MorphoSource |                               |          |
| Colubroidea    | Viperidae      | <i>Agkistrodon</i>  | <i>contortrix</i>     | FMNH 166644  | DigiMorph    |                               |          |
| Colubroidea    | Viperidae      | <i>Bitis</i>        | <i>arietans</i>       | ZMB 16732    | Müller CT    |                               |          |
| Colubroidea    | Viperidae      | <i>Causus</i>       | <i>rhombeatus</i>     | FMNH 74241   | DigiMorph    |                               |          |
| Colubroidea    | Viperidae      | <i>Daboia</i>       | <i>russelii</i>       | FMNH 121477  | DigiMorph    |                               |          |
| Colubroidea    | Lamprophiidae  | <i>Aparallactus</i> | <i>modestus</i>       | ZMB6910      | Müller CT    |                               |          |
| Colubroidea    | Lamprophiidae  | <i>Atractaspis</i>  | <i>irregularis</i>    | FMNH 62204   | DigiMorph    |                               |          |
| Colubroidea    | Lamprophiidae  | <i>Calliophis</i>   | <i>bivirgata</i>      | ZMB 29637A   | Müller CT    |                               |          |
| Colubroidea    | Lamprophiidae  | <i>Micrurus</i>     | <i>fulvius</i>        | FMNH 29479   | DigiMorph    |                               | •        |
| Colubroidea    | Lamprophiidae  | <i>Laticauda</i>    | <i>colubrina</i>      | FMNH 202810  | DigiMorph    |                               |          |



| Higher Taxon | Family        | Genus                | species                 | Specimen No.      | Source       | Original Label       | Mirrored |
|--------------|---------------|----------------------|-------------------------|-------------------|--------------|----------------------|----------|
| Colubroidea  | Lamprophiidae | <i>Drysdalia</i>     | <i>coronoides</i>       | ZMB 4702A         | Müller CT    |                      |          |
| Colubroidea  | Lamprophiidae | <i>Langaha</i>       | <i>madagascariensis</i> | ZMB 14371         | Müller CT    |                      |          |
| Colubroidea  | Homalopsidae  | <i>Enhydris</i>      | <i>enhydris</i>         | ZMB 33627         | MfN CT       |                      | •        |
| Colubroidea  | Homalopsidae  | <i>Homalopsis</i>    | <i>buccata</i>          | FMNH 259340       | DigiMorph    |                      |          |
| Colubroidea  | Pareatidae    | <i>Pareas</i>        | <i>hamptoni</i>         | FMNH 128304       | DigiMorph    |                      |          |
| Colubroidea  | Colubridae    | <i>Sibynophis</i>    | <i>collaris</i>         | ZMB 4964          | MfN CT       | <i>S. germinatus</i> |          |
| Colubroidea  | Colubridae    | <i>Grayia</i>        | <i>smithii</i>          | ZMB 24321         | Müller CT    |                      |          |
| Colubroidea  | Colubridae    | <i>Afronatrix</i>    | <i>anoscopus</i>        | FMNH 179335       | DigiMorph    |                      |          |
| Colubroidea  | Colubridae    | <i>Coluber</i>       | <i>constrictor</i>      | FMNH 135284       | DigiMorph    |                      |          |
| Colubroidea  | Colubridae    | <i>Sonora</i>        | <i>semiannulata</i>     | FMNH 26876        | DigiMorph    |                      |          |
| Colubroidea  | Colubridae    | <i>Trimorphodon</i>  | <i>biscutatus</i>       | FMNH 42171        | DigiMorph    |                      |          |
| Colubroidea  | Colubridae    | <i>Lampropeltis</i>  | <i>getula</i>           | FMNH 95184        | DigiMorph    |                      |          |
| Colubroidea  | Colubridae    | <i>Elaphe</i>        | <i>dione</i>            | MNH 1909-69       | Müller CT    |                      |          |
| Colubroidea  | Colubridae    | <i>Pseudoxenodon</i> | <i>bambusicola</i>      | ZMB 65459         | Müller CT    |                      |          |
| Colubroidea  | Colubridae    | <i>Prosymna</i>      | <i>meleagris</i>        | ZMB 78750         | Müller CT    | <i>P. ambigua</i>    |          |
| Colubroidea  | Colubridae    | <i>Psammophis</i>    | <i>sibilans</i>         | ZMB 66045         | Müller CT    |                      |          |
| Colubroidea  | Colubridae    | <i>Amphiesma</i>     | <i>stolatum</i>         | FMNH 169627       | DigiMorph    |                      |          |
| Colubroidea  | Colubridae    | <i>Xenochrophis</i>  | <i>flavipunctatus</i>   | FMNH 179132       | DigiMorph    |                      |          |
| Colubroidea  | Colubridae    | <i>Regina</i>        | <i>grahami</i>          | ZMB 49380         | Müller CT    | <i>R. grahamae</i>   |          |
| Colubroidea  | Colubridae    | <i>Thamnophis</i>    | <i>marcianus</i>        | FMNH 26260        | DigiMorph    |                      |          |
| Colubroidea  | Colubridae    | <i>Natrix</i>        | <i>natrix</i>           | FLMNH 1917.6.22.1 | MorphoSource |                      |          |
| Colubroidea  | Colubridae    | <i>Diadophis</i>     | <i>punctatus</i>        | FMNH 244371       | DigiMorph    |                      |          |
| Colubroidea  | Colubridae    | <i>Heterodon</i>     | <i>platirhinus</i>      | FMNH 194529       | DigiMorph    |                      |          |
| Colubroidea  | Colubridae    | <i>Uromacer</i>      | <i>oxyrhynchus</i>      | ZMB 28564         | Müller CT    |                      |          |
| Colubroidea  | Colubridae    | <i>Philodryas</i>    | <i>olfersii</i>         | ZMB 2609          | Müller CT    |                      | •        |
| Colubroidea  | Colubridae    | <i>Imantodes</i>     | <i>cenchoa</i>          | FMNH 57616        | DigiMorph    |                      |          |
| Colubroidea  | Colubridae    | <i>Dipsas</i>        | <i>variegata</i>        | ZMB 1818          | Müller CT    |                      |          |

**Table S3. The number of principal component axes (No. PCs) encompassing >95% of shape variation and marginal log-likelihoods for evolutionary models.** The models of trait evolution evaluated include Brownian Motion (BM), Ornstein-Uhlenbeck (OU),  $\delta$ ,  $\kappa$ , and  $\lambda$  models. Gray cells indicate evolutionary model supported by Bayes Factor.

| Dataset                 | No. PCs | BM       | OU       | $\delta$ | $\kappa$ | $\lambda$ |
|-------------------------|---------|----------|----------|----------|----------|-----------|
| Combined                | 25      | -18490.9 | -18438.9 | -18504.3 | -18520.3 | -18446.0  |
| Extant                  | 31      | -21825.4 | -21764.2 | -21791.9 | -21825.0 | -21761.4  |
| Lizard                  | 32      | -14055.9 | -13993.0 | -14043.6 | -14052.0 | -13999.5  |
| Snake                   | 25      | -7050.0  | -7030.4  | -7045.7  | -7037.4  | -7036.3   |
| Premaxilla              | 6       | -4045.6  | -4031.6  | -4033.0  | -4038.5  | -4028.3   |
| Nasal                   | 7       | -4170.0  | -4349.4  | -4167.1  | -4178.6  | -4156.2   |
| Maxilla                 | 9       | -6695.7  | -6696.2  | -6694.5  | -6706.3  | -6688.5   |
| Jugal                   | 6       | -2595.9  | -2592.0  | -2594.5  | -2591.0  | -2589.5   |
| Frontal                 | 7       | -5072.2  | -5056.7  | -5060.9  | -5068.3  | -5046.6   |
| Parietal                | 10      | -6882.7  | -6873.8  | -6881.4  | -6892.9  | -6857.9   |
| Squamosal/Supratemporal | 6       | -3908.3  | -4037.1  | -3887.4  | -3897.5  | -3897.1   |
| Jaw Joint               | 3       | -2303.4  | -2305.0  | -2300.8  | -2305.3  | -2302.1   |
| Supra-otooccipital      | 13      | -8297.4  | -8250.9  | -8291.2  | -8304.8  | -8244.0   |
| Basioccipital           | 6       | -3925.6  | -3916.9  | -3924.6  | -3929.0  | -3915.9   |
| Occipital condyle       | 2       | -1304.6  | -1305.5  | -1300.3  | -1302.0  | -1298.7   |
| Pterygoid               | 7       | -4450.5  | -4435.8  | -4435.5  | -4448.9  | -4423.9   |
| Palatine                | 10      | -5653.8  | -5655.6  | -5655.6  | -5661.3  | -5652.3   |

**Table S4. Disparity and mean evolutionary rates across modules for the lizard, snake, extant, and combined datasets.** Disparity, as measured by Procrustes variance (uncorrected) and mean evolutionary rate ( $\sigma^2$ ) under Brownian motion model.

| Partition               | Disparity <sub>combined</sub> | Disparity <sub>extant</sub> | Disparity <sub>lizard</sub> | Disparity <sub>snake</sub> | $\sigma^2$ <sub>combined</sub> | $\sigma^2$ <sub>extant</sub> | $\sigma^2$ <sub>lizard</sub> | $\sigma^2$ <sub>snake</sub> |
|-------------------------|-------------------------------|-----------------------------|-----------------------------|----------------------------|--------------------------------|------------------------------|------------------------------|-----------------------------|
| Premaxilla              | 0.0016                        | 0.0008                      | 0.0006                      | 0.0007                     | 6.584e-8                       | 3.476e-8                     | 2.818e-8                     | 4.309e-8                    |
| Nasal                   | —                             | 0.0009                      | 0.0006                      | 0.0009                     | —                              | 2.941e-8                     | 2.042e-8                     | 4.400e-8                    |
| Maxilla                 | 0.0068                        | 0.0036                      | 0.0015                      | 0.0039                     | 1.073e-7                       | 5.877e-8                     | 2.703e-8                     | 1.067e-7                    |
| Jugal                   | —                             | —                           | 0.0024                      | —                          | —                              | —                            | 4.973e-8                     | —                           |
| Frontal                 | 0.0037                        | 0.0022                      | 0.0019                      | 0.0010                     | 7.573e-8                       | 4.128e-8                     | 3.810e-8                     | 4.156e-8                    |
| Parietal                | 0.0038                        | 0.0027                      | 0.0024                      | 0.0011                     | 1.021e-7                       | 6.812e-8                     | 6.894e-8                     | 5.709e-8                    |
| Squamosal/Supratemporal | —                             | 0.0017                      | 0.0013                      | 0.0009                     | 6.929e-8                       | 7.531e-8                     | 6.226e-8                     | 8.990e-8                    |
| Jaw Joint               | —                             | 0.0042                      | 0.0097                      | 0.0030                     | —                              | 1.799e-7                     | 6.304e-8                     | 3.418e-7                    |
| Supra-otoccipital       | 0.0029                        | 0.0014                      | 0.0015                      | 0.0012                     | —                              | 3.247e-8                     | 2.518e-8                     | 4.910e-8                    |
| Basioccipital           | —                             | 0.0029                      | 0.0011                      | 0.0014                     | —                              | 3.675e-8                     | 2.232e-8                     | 6.005e-8                    |
| Occipital condyle       | —                             | 0.0004                      | 0.0006                      | 0.0032                     | —                              | 3.036e-8                     | 2.511e-8                     | 4.694e-8                    |
| Pterygoid               | —                             | 0.0021                      | 0.0012                      | 0.0017                     | —                              | 8.482e-8                     | 3.664e-8                     | 1.458e-7                    |
| Palatine                | —                             | 0.0010                      | 0.0010                      | 0.0010                     | —                              | 4.876e-8                     | 2.378e-8                     | 8.455e-8                    |
| Total                   | 0.0188                        | 0.0240                      | 0.0170                      | 0.0172                     | 4.203e-7                       | 5.867e-7                     | 4.117e-7                     | 8.898e-7                    |

**Table S5. Ecological and developmental traits of sampled taxa.** Note that ovoviviparous taxa were considered viviparous in MANOVA.

| Species                         | Habitat                | Locomotion             | Diet        | Reproductive mode | Reference                                                                                                                                                                                                                                                                                                                                                                                                                                                 |
|---------------------------------|------------------------|------------------------|-------------|-------------------|-----------------------------------------------------------------------------------------------------------------------------------------------------------------------------------------------------------------------------------------------------------------------------------------------------------------------------------------------------------------------------------------------------------------------------------------------------------|
| <i>Acontias percivali</i>       | Fossorial              | Digger                 | Invertivore | Viviparous        | Heideman NJL, Daniels SR, Mashinini PL, Mokone ME, Thibedi ML, Hendricks MGJ, Wilson BA, Douglas RM (2008) Sexual dimorphism in the Afrian legless skink subfamily Acontinae (Reptilia: Scincidae). <i>Afr Zool</i> 43:192–201.; Spawls S, Howell, K, Drewes R, Ashe J (2002) Reptiles of East Africa (Academic Press).                                                                                                                                   |
| <i>Aeluroscalabotes felinus</i> | Semi-arboreal          | Climber                | Invertivore | Oviparous         | Grismer LL (2006) Slender toes in southern Malaysia. <i>Iguana</i> 13:3–6.; Kratochvíl L, Frynta D (2006) Body-size effects on egg size in eublepharid geckos (Squamata: Eublepharidae), lizards with invariant clutch size: Negative allometry for egg size in ectotherms is not universal. <i>Biol J Linn Soc</i> 88:527–532.; Das I (2010) A Field Guide to the Reptiles of South-east Asia (New Holland Publishers).                                  |
| <i>Agama agama</i>              | Terrestrial saxicolous | Ground dweller/climber | Invertivore | Oviparous         | Enge KM, Krysko KL, Tablley B (2004) Distribution and ecology of the introduced African Rainbow lizard, <i>Agama agama africana</i> (Sauria: Agamidae), in Florida. <i>Fl Acad Sci</i> 67:303–310.; Chirio L, LeBreton M (2007) Atlas des reptiles du Cameroun. Publications Scientifiques du Muséum National d’Histoire naturelle, vol. 67 (Naturelle & IRD Editions).                                                                                   |
| <i>Alopoglossus copii</i>       | Leaf litter            | Litter dweller         | Invertivore | Oviparous         | Duellman WE (1978) The biology of an equatorial herpetofauna in Amazonian Ecuador. <i>Univ Kansas Sci Bull</i> 65:1–352.; Köhler G, Diethert H-H, Vesely M (2012) A contribution to the knowledge of the lizard genus <i>Alopoglossus</i> (Squamata: Gymnophthalmidae). <i>Herpitol Monogr</i> 26:173–188.; Pyron RA, Burbrink FT (2013) Early origin of viviparity and multiple reversions to oviparity in squamate reptiles. <i>Ecol Lett</i> 17:13–21. |
| <i>Amblyrhynchus cristatus</i>  | Semi-aquatic           | Ground dweller/swimmer | Herbivore   | Oviparous         | Trillmich KGG, Trillmich F (1986) Foraging strategies of the marine Iguana, <i>Amblyrhynchus cristatus</i> . <i>Behav Ecol Sociobiol</i> 18:259–266.; Rauch N (1988) Competition of marine iguana females ( <i>Amblyrhynchus cristatus</i> ) for egg-laying sites. <i>Behaviour</i> 107:91–106.                                                                                                                                                           |
| <i>Ameiva ameiva</i>            | Terrestrial            | Ground dweller         | Invertivore | Oviparous         | Vitt LJ (1991) An introduction to the ecology of cerrado lizards. <i>J Herpetol</i> 25:79–90.                                                                                                                                                                                                                                                                                                                                                             |
| <i>Amphiglossus splendidus</i>  | Leaf litter            | Litter dweller         | Invertivore | Oviparous         | Raxworthy CJ, Nussbaum RA (1993) Four new species of <i>Amphiglossus</i> from Madagascar (Squamata: Scincidae). <i>Herpetologica</i> 49:326–341.; Pyron RA, Burbrink FT (2013) Early origin of viviparity and multiple reversions to oviparity in squamate reptiles. <i>Ecol Lett</i> 17:13–21.; Melstrom KM (2017) The relationship between diet and tooth complexity in living dentigerous saurian. <i>J Morphol</i> 278:500–522.                       |
| <i>Amphisbaena fuliginosa</i>   | Leaf litter            | Litter dweller         | Invertivore | Oviparous         | Andrade DV, Nascimento LB, Abe AS (2006) Habits hidden underground: a review on the reproduction of the Amphisbaenia with notes on four neotropical species. <i>Amphib Reptil</i> 27:207217.; Starace                                                                                                                                                                                                                                                     |

|                                   |               |                        |             |               |                                                                                                                                                                                                                                                                                                                                                                                                                                         |
|-----------------------------------|---------------|------------------------|-------------|---------------|-----------------------------------------------------------------------------------------------------------------------------------------------------------------------------------------------------------------------------------------------------------------------------------------------------------------------------------------------------------------------------------------------------------------------------------------|
| <i>Anelytropsis papillosus</i>    | Fossorial     | Digger                 | Unknown     | Oviparous     | F (2013) Serpents et amphisbenes de Guyane francaise (Ibis Rouge Editions).<br>Canseco-Márquez L, Mendoza-Quijano F, Ponce-Campos P. (2007) <i>Anelytropsis papillosus</i> . The IUCN Red List of Threatened Species 2007: e.T64016A12735885.<br><a href="http://dx.doi.org/10.2305/IUCN.UK.2007.RLTS.T64016A12735885.en">http://dx.doi.org/10.2305/IUCN.UK.2007.RLTS.T64016A12735885.en</a>                                            |
| <i>Anniella pulchra</i>           | Fossorial     | Digger                 | Invertivore | Viviparous    | Miller CM (1944) Ecologic relations and adaptations of the limbless lizards of the genus <i>Anniella</i> . <i>Ecol Monogr</i> 14:271–289.                                                                                                                                                                                                                                                                                               |
| <i>Anolis carolinensis</i>        | Arboreal      | Climber                | Invertivore | Oviparous     | Lister BC (1976) The nature of niche expansion in West Indian <i>Anolis</i> lizards I: Ecological consequences of reduced competition. <i>Evolution</i> 30:659–676.; Meiri S, Feldman A, Kratochvíl L (2015) Squamate hatchling size and the evolutionary causes of negative offspring allometry. <i>J Evol Biol</i> 28:438–446.                                                                                                        |
| <i>Atlantolacerta andreanskyi</i> | Terrestrial   | Ground dweller         | Invertivore | Oviparous     | Busack SD (1987) Notes on the biology of <i>Lacerta andreanskyi</i> (Reptilia: Lacertidae). <i>Amphib Reptil</i> 8:231–236.; Carretero MA, Perera A, Harris DJ, Batista V, Punho C (2006) Spring diet and trophic partitioning in an alpine lizard community from Morocco. <i>Afr Zool</i> 41:113–122.                                                                                                                                  |
| <i>Bachia flavescens</i>          | Leaf litter   | Litter dweller         | Invertivore | Oviparous     | Barros FC, Herrel A, Kohlsdorf T (2011) Head shape evolution in Gymnophthalmidae: Does habitat use constrain the evolution of cranial design in fossorial lizards? <i>J Evol Biol</i> 24:2423–2433.; <i>Bachia flavescens</i> . The Reptile Database. <a href="http://reptile-database.reptarium.cz/species?genus=Bachia&amp;species=flavescens">http://reptile-database.reptarium.cz/species?genus=Bachia&amp;species=flavescens</a> . |
| <i>Basiliscus basiliscus</i>      | Semi-arboreal | Ground dweller/climber | Omnivore    | Oviparous     | Fleet, RR, Fitch HS (1974) Food Habits of <i>Basiliscus basiliscus</i> in Costa Rica. <i>J Herpetol</i> 8:260–262.; Lieberman A (1980) Nesting of the Basilisk lizard ( <i>Basiliscus basiliscus</i> ). <i>J Herpetol</i> 14:103–105.; Van Devender RW (1982) Comparative demography of the lizard <i>Basiliscus basiliscus</i> . <i>Herpetol</i> 38:189–208.                                                                           |
| <i>Bipes biporus</i>              | Fossorial     | Digger                 | Invertivore | Oviparous     | Maisano JA (2001) A survey of state of ossification in neonatal squamates. <i>Herpetol Monogr</i> 15:135–157.; Kearney M (2003) Diet in the amphisbaenian <i>Bipes biporus</i> . <i>J Herpetol</i> 37:404–408.                                                                                                                                                                                                                          |
| <i>Blanus cinereus</i>            | Fossorial     | Digger                 | Invertivore | Oviparous     | Lopez P, Martin J, Salvador A (1991) Diet selection by the amphisbaenian <i>Blanus cinereus</i> . <i>Herpetologica</i> 47:210–218.; Packard MJ, DeMarco VG (1991) Eggshell structure and formation in eggs of oviparous reptiles. <i>Egg Incubation: Its Effects on Embryonic Development in Birds and Reptiles</i> , eds Deeming DC, Ferguson MWJ, pp 53–69 (Cambridge University Press).                                              |
| <i>Brachylophus fasciatus</i>     | Arboreal      | Climber                | Omnivore    | Oviparous     | Birchard GF, Marcellini D (1996) Incubation time in reptilian eggs. <i>J Zool</i> 240:621–635.; Morrison C, Osborne T, Harlow PS, Thomas N, Biciloa P, Niukula J (2007) Diet and habitat preferences of the Fijian crested iguana ( <i>Brachylophus vitiensis</i> ) on Yadua Taba, Fiji: Implications for conservation. <i>Austr J Zool</i> 55:341–350.                                                                                 |
| <i>Brachymeles gracilis</i>       | Leaf litter   | Litter dweller         | Invertivore | Ovoviviparous | Smith BE (1993) Notes on a collection of squamate reptiles from Eastern Mindanao, Philippine Islands Part 1: Lacertilia. <i>Asia</i>                                                                                                                                                                                                                                                                                                    |

|                                    |             |                |             |            |                                                                                                                                                                                                                                                                                                                                                                                                                                                                                                                                                                                                                                                                                                                                                                                                                                                                                                                                  |
|------------------------------------|-------------|----------------|-------------|------------|----------------------------------------------------------------------------------------------------------------------------------------------------------------------------------------------------------------------------------------------------------------------------------------------------------------------------------------------------------------------------------------------------------------------------------------------------------------------------------------------------------------------------------------------------------------------------------------------------------------------------------------------------------------------------------------------------------------------------------------------------------------------------------------------------------------------------------------------------------------------------------------------------------------------------------|
| <i>Brookesia brygooi</i>           | Leaf litter | Litter dweller | Invertivore | Oviparous  | <i>Herpetol Res</i> 5:85–95.; Diesmos AC (2008) Ecology and diversity of herpetofaunal communities in fragmented lowland rainforests in the Philippines. Unpublished PhD Thesis. University of Singapore.<br>Blackburn DG (1993) Standardized criteria for the recognition of reproductive modes in squamate reptiles. <i>Herpetologica</i> 49:118–132.<br>Glaw F, Vences M (2007) A Field Guide to the Amphibians and Reptiles of Madagascar (Vences & Glaw).; Randrianantoandro JC, Randrianelona R, Andriantsimanarilafy RR, Fideline HE, Rakotondravony D, Jenkins RKB (2008) Roost site characteristics of sympatric dwarf chameleons (genus <i>Brookesia</i> ) from Western Madagascar. <i>Amphib Reptil</i> 28:577–581.; Crottini A, Miralles AM, Glaw F, Harris DJ, Lima A, Vences M (2012) Description of a new pygmy chameleon (Chamaeleonidae: <i>Brookesia</i> ) from central Madagascar. <i>Zootaxa</i> 3490:63–74. |
| <i>Callopiastes maculatus</i>      | Terrestrial | Ground dweller | Carnivore   | Oviparous  | Donoso-Barros R (1966) Reptiles de Chile (Ediciones Universidad de Chile).; Fuentes ER (1976) Ecological convergence of lizard communities in Chile and California. <i>Ecology</i> 57:3–17.; Packard GC, Tracy CR, Roth JJ (1977) The physiological ecology of reptilian eggs and embryos and the evolution of viviparity within the class Reptilia. <i>Biol Rev</i> 52:71–105.; Vidal MA, Labra A (2008) Dieta de anfibios y reptiles. <i>Herpetologia de Chile</i> , eds Vidal MA, Labra A, pp 453–482 (Springer Verlag).                                                                                                                                                                                                                                                                                                                                                                                                      |
| <i>Calotes emma</i>                | Arboreal    | Climber        | Invertivore | Oviparous  | Schaedla WH (2004) Anomalous (?) nocturnal feeding by the agamid lizard <i>Calotes emma</i> in Northeastern Thailand. <i>Asian Herpetol Res</i> 10:295–297.; Das I (2010) A Field Guide to the Reptiles of South-east Asia (New Holland Publishers).; Pyron RA, Burbrink FT (2013) Early origin of viviparity and multiple reversions to oviparity in squamate reptiles. <i>Ecol Lett</i> 17:13–21.                                                                                                                                                                                                                                                                                                                                                                                                                                                                                                                              |
| <i>Celestus enneagrammus</i>       | Terrestrial | Ground dweller | Unknown     | Viviparous | Canseco-Márquez L, Campbell JA, Ponce-Campos P, Muñoz-Alonso A, García-Aguayo A (2007) <i>Celestus enneagrammus</i> . The IUCN Red List of Threatened Species 2007: e.T63696A12699497. <a href="http://dx.doi.org/10.2305/IUCN.UK.2007.RLTS.T63696A12699497">http://dx.doi.org/10.2305/IUCN.UK.2007.RLTS.T63696A12699497</a> . en.; Pyron RA, Burbrink FT (2013) Early origin of viviparity and multiple reversions to oviparity in squamate reptiles. <i>Ecol Lett</i> 17:13–21.                                                                                                                                                                                                                                                                                                                                                                                                                                                |
| <i>Chalarodon madagascariensis</i> | Terrestrial | Ground dweller | Omnivore    | Oviparous  | Brillet C (1982) Contribution à l'étude des relations entre individus chez cinq espèces d'iguanes malgaches du genre <i>Oplurus</i> . <i>Rev Ecol-Terre Vie</i> 36:79–148.; Gardner C, Jasper L (2012) Cannibalism in <i>Chalarodon madagascariensis</i> (Squamata: Iguanidae) from southwest Madagascar. <i>Herpetol Notes</i> 5:127–128.; Pyron RA, Burbrink FT (2013) Early origin of viviparity and multiple reversions to oviparity in squamate reptiles. <i>Ecol Lett</i> 17:13–21.                                                                                                                                                                                                                                                                                                                                                                                                                                        |
| <i>Chamaeleo calyptratus</i>       | Arboreal    | Climber        | Invertivore | Oviparous  | Krysko KL, Enge KM, King FW (2004) The veiled chameleon, <i>Chamaeleo calyptratus</i> : A new exotic lizard species in Florida. <i>Florida Scientist</i> 67:249–253.                                                                                                                                                                                                                                                                                                                                                                                                                                                                                                                                                                                                                                                                                                                                                             |

|                                     |                        |                        |             |               |                                                                                                                                                                                                                                                                                                                                                                                                                                                                                                                                                                               |
|-------------------------------------|------------------------|------------------------|-------------|---------------|-------------------------------------------------------------------------------------------------------------------------------------------------------------------------------------------------------------------------------------------------------------------------------------------------------------------------------------------------------------------------------------------------------------------------------------------------------------------------------------------------------------------------------------------------------------------------------|
| <i>Chamaesaura anguina</i>          | Terrestrial            | Ground dweller         | Invertivore | Viviparous    | du Toit A (2001) The ecology of the Cape grass lizard, <i>Chamaesaura anguina</i> . MSc Thesis. University of Stellenbosch.                                                                                                                                                                                                                                                                                                                                                                                                                                                   |
| <i>Chirindia swynnertoni</i>        | Fossorial              | Digger                 | Invertivore | Oviparous     | Broadley DG, Gans C (1978) Southern forms of <i>Chirindia</i> (Amphisbaenia, Reptilia) (Carnegie Museum of Natural History).; Branch B (1998) Field Guide to the Snakes and Other Reptiles of Southern Africa (Struik).; Andrade DV, Nascimento LB, Abe AS (2006) Habits hidden underground: A review on the reproduction of the Amphisbaenia with notes on four neotropical species. <i>Amphib Reptil</i> 27:207–217.                                                                                                                                                        |
| <i>Coleonyx variegatus</i>          | Terrestrial            | Ground dweller         | Invertivore | Oviparous     | Knowlton GF (1938) Lizards in insect control.; Parker WS (1972) Aspects of the ecology of a Sonoran Desert population of the Western Banded gecko. <i>Am Midl Nat</i> 88:209–224.; Birchard GF, Marcellini D (1996) Incubation time in reptilian eggs. <i>J Zool</i> 240:621–635.; Stebbins RC (2003) A Field Guide to Western Reptiles and Amphibians (3 <sup>rd</sup> ed.) (Houghton Mifflin).                                                                                                                                                                              |
| <i>Colobosaura modesta</i>          | Leaf litter            | Litter dweller         | Invertivore | Oviparous     | Freire EMX, da Silva Jorge J, Ribeiro LB (2012) First record of <i>Colobosaura modesta</i> (Reinhardt and Lütken, 1862) (Squamata: Gymnophthalmidae) to the Cariri region, state of Ceará, Brazil, with a map of its geographical distribution. <i>Check List</i> 8:970–972.; Pyron RA, Burbrink FT (2013) Early origin of viviparity and multiple reversions to oviparity in squamate reptiles. <i>Ecol Lett</i> 17:13–21.; Torelli A, Eisemberg CC, Brassaloti RA, Bertoluci J (2017) <i>Colobosaura modesta</i> (Bahia Colobosaura). <i>Diet. Herpetol Rev</i> 48:641–642. |
| <i>Conolophus subcristatus</i>      | Terrestrial            | Ground dweller         | Herbivore   | Oviparous     | Ellis HI, Ross, JP (1978) Field observations of cooling rates of Galapagos Land iguanas ( <i>Conolophus subcristatus</i> ). <i>Comp Biochem Physiol</i> 59A:205–209.; Birchard GF, Marcellini D (1996) Incubation time in reptilian eggs. <i>J Zool</i> 240:621–635.; Zug GR (2013) Reptiles and Amphibians of the Pacific Islands: Comprehensive Guide (University of California Press).                                                                                                                                                                                     |
| <i>Cordylosaurus subtessellatus</i> | Terrestrial            | Ground dweller         | Unknown     | Oviparous     | Packard GC, Tracy CR, Roth JJ (1977) The physiological ecology of reptilian eggs and embryos and the evolution of viviparity within the class Reptilia. <i>Biol Rev</i> 52:71–105.; Mouton PLEFN, Van Wyk JH (1997) Adaptive radiation in cordyliform lizards: An overview. <i>Afr J Herpetol</i> 46(2):78–88.; Branch B (1998) Field Guide to the Snakes and Other Reptiles of Southern Africa (Struik).                                                                                                                                                                     |
| <i>Smaug mossambicus</i>            | Terrestrial saxicolous | Ground dweller/climber | Invertivore | Ovoviviparous | Branch B (1998) Field Guide to the Snakes and Other Reptiles of Southern Africa (Struik).                                                                                                                                                                                                                                                                                                                                                                                                                                                                                     |
| <i>Corytophanes cristatus</i>       | Arboreal               | Climber                | Invertivore | Oviparous     | Andrews RM (1979) The lizard <i>Corytophanes cristatus</i> : An extreme "sit-and-wait" predator. <i>Biotropica</i> 11:136–139.; Pyron RA, Burbrink FT (2013) Early origin of viviparity and multiple reversions to oviparity in squamate reptiles. <i>Ecol Lett</i> 17:13–21.                                                                                                                                                                                                                                                                                                 |
| <i>Cricosaura typica</i>            | Leaf litter            | Litter dweller         | Invertivore | Viviparous    | Packard GC, Tracy CR, Roth JJ (1977) The physiological ecology of reptilian eggs and embryos and the evolution of viviparity within the class Reptilia. <i>Biol Rev</i> 52:71–105.; Schwartz A, Henderson RW                                                                                                                                                                                                                                                                                                                                                                  |

|                              |               |                        |             |           |                                                                                                                                                                                                                                                                                                                                                                                                                                                                                                                                                                                                                                          |
|------------------------------|---------------|------------------------|-------------|-----------|------------------------------------------------------------------------------------------------------------------------------------------------------------------------------------------------------------------------------------------------------------------------------------------------------------------------------------------------------------------------------------------------------------------------------------------------------------------------------------------------------------------------------------------------------------------------------------------------------------------------------------------|
|                              |               |                        |             |           | (1991) Amphibians and Reptiles of the West Indies (University of Florida Press).                                                                                                                                                                                                                                                                                                                                                                                                                                                                                                                                                         |
| <i>Crotaphytus collaris</i>  | Terrestrial   | Ground dweller         | Invertivore | Oviparous | Packard MJ, DeMarco VG (1991) Eggshell structure and formation in eggs of oviparous reptiles. <i>Egg Incubation: Its Effects on Embryonic Development in Birds and Reptiles</i> , eds Deeming DC, Ferguson MWJ, pp 53–69 (Cambridge University Press).; Husak JF, McCoy JK (2000) Diet composition of the collared lizard ( <i>Crotaphytus collaris</i> ) in west-central Texas. <i>Texas J Sci</i> 52:93–100.                                                                                                                                                                                                                           |
| <i>Ctenosaura pectinata</i>  | Semi-arboreal | Ground dweller/climber | Herbivore   | Oviparous | Tauber E, Rojas-Ramírez J, Peón RH (1968) Electrophysiological and behavioral correlates of wakefulness and sleep in the lizard, <i>Ctenosaura pectinata</i> . <i>Electroencephalogr Clin Neurophysiol</i> 24:424–433.; Packard MJ, DeMarco VG (1991) Eggshell structure and formation in eggs of oviparous reptiles. <i>Egg Incubation: Its Effects on Embryonic Development in Birds and Reptiles</i> , eds Deeming DC, Ferguson MWJ, pp 53–69 (Cambridge University Press).; Durtsche RD (2000) Ontogenetic plasticity of food habits in the Mexican Spiny-tailed iguana, <i>Ctenosaura pectinata</i> . <i>Oecologia</i> 124:185–195. |
| <i>Hemidactylus frenatus</i> | Arboreal      | Climber                | Invertivore | Oviparous | Tyler MJ (1961) On the diet and feeding habits of <i>Hemidactylus frenatus</i> (Dumeril and Bibron) (Reptilia; Gekkonidae) at Rangoon, Burma. <i>Trans R Soc South Austr</i> 84:45–49.; Hoskin CJ (2011) The invasion and potential impact of the Asian House Gecko ( <i>Hemidactylus frenatus</i> ) in Australia. <i>Austr Ecol</i> 36:240–251.; Tkaczenko GK, Fischer AC, Weterings R (2014) Prey preference of the Common House geckos <i>Hemidactylus frenatus</i> and <i>Hemidactylus platyurus</i> . <i>Herpetol Notes</i> 7:483–488.                                                                                              |
| <i>Delma borea</i>           | Terrestrial   | Ground dweller         | Invertivore | Oviparous | Cogger HG (2000) Reptiles & Amphibians of Australia (New Holland Publishers).; Pyron RA, Burbrink FT (2013) Early origin of viviparity and multiple reversions to oviparity in squamate reptiles. <i>Ecol Lett</i> 17:13–21.; Brennan IG (2014) Interspecific and intraspecific relationships, and biogeography of Flap-footed geckos, <i>Delma</i> Gray 1831 (Squamata: Pygopodidae). MSc Thesis, Villanova University.                                                                                                                                                                                                                 |
| <i>Dibamus novaeguineae</i>  | Fossorial     | Digger                 | Omnivore    | Oviparous | Allison A (1982) Distribution and ecology of New Guinea lizards. <i>Biogeography and Ecology of New Guinea</i> , ed Gressitt JL, pp. 803–813 (Springer Dordrecht).; Rieppel O (1984) The cranial morphology of the fossorial lizard genus <i>Dibamus</i> with a consideration of its phylogenetic relationships. <i>J Zool Lond</i> 204:289–327.; Pyron RA, Burbrink FT (2013) Early origin of viviparity and multiple reversions to oviparity in squamate reptiles. <i>Ecol Lett</i> 17:13–21.                                                                                                                                          |
| <i>Strophurus ciliaris</i>   | Arboreal      | Climber                | Invertivore | Oviparous | Pianka ER, Pianka HD (1976) Comparative ecology of twelve species of nocturnal lizards (Gekkonidae) in the Western Australian Desert. <i>Copeia</i> 1976:125–142.; Cogger HG (2000) Reptiles & Amphibians of Australia (New Holland Publishers).                                                                                                                                                                                                                                                                                                                                                                                         |



|                               |               |                        |             |           |                                                                                                                                                                                                                                                                                                                                                                                                                                                                                                                                                |
|-------------------------------|---------------|------------------------|-------------|-----------|------------------------------------------------------------------------------------------------------------------------------------------------------------------------------------------------------------------------------------------------------------------------------------------------------------------------------------------------------------------------------------------------------------------------------------------------------------------------------------------------------------------------------------------------|
| <i>Diplometopon zarudnyi</i>  | Fossorial     | Digger                 | Invertivore | Oviparous | Pyron RA, Burbrink FT (2013) Early origin of viviparity and multiple reversions to oviparity in squamate reptiles. <i>Ecol Lett</i> 17:13–21.; Al-Sadoon MK, Paray BA, Rudayni HA (2016) Diet of the worm lizard, <i>Diplometopon zarudnyi</i> (Nikolsky, 1907), in Riyadh province, Saudi Arabia (Reptilia: Trogonophidae). <i>Zoology in the Middle East</i> 62:227–230.                                                                                                                                                                     |
| <i>Dipsosaurus dorsalis</i>   | Terrestrial   | Ground dweller         | Herbivore   | Oviparous | Birchard GF, Marcellini D (1996) Incubation time in reptilian eggs. <i>J Zool</i> 240:621–635.; Jayne BC, Irschick DJ (1999) Effects of incline and speed on the three-dimensional hindlimb kinematics of a generalized iguanian lizard ( <i>Dipsosaurus dorsalis</i> ). <i>J Exp Biol</i> 202:143–159.; Dibble CJ, Smith GR, Lemos-Espinal JA (2008) Diet and sexual dimorphism of the Desert iguana, <i>Dipsosaurus dorsalis</i> , from Sonora, Mexico. <i>Western North American Naturalist</i> 68:521–523.                                 |
| <i>Draco quinquefasciatus</i> | Arboreal      | Climber/glider         | Invertivore | Oviparous | Pyron RA, Burbrink FT (2013) Early origin of viviparity and multiple reversions to oviparity in squamate reptiles. <i>Ecol Lett</i> 17:13–21.; Ord TJ, Klomp DA (2014) Habitat partitioning and morphological differentiation: The Southeast Asian <i>Draco</i> lizards and Caribbean <i>Anolis</i> lizards compared. <i>Oecologia</i> 175:651–666.                                                                                                                                                                                            |
| <i>Elgaria multicarinata</i>  | Leaf litter   | Litter dweller         | Invertivore | Oviparous | Fitch HS (1935) Natural History of the Alligator Lizards (Academy of Science of Saint Louis).; Cunningham JD (1956) Food habits of the San Diego Alligator lizard. <i>Herpetologica</i> 12:225–230.; Pyron RA, Burbrink FT (2013) Early origin of viviparity and multiple reversions to oviparity in squamate reptiles. <i>Ecol Lett</i> 17:13–21.                                                                                                                                                                                             |
| <i>Enyalioides laticeps</i>   | Semi-arboreal | Ground dweller/climber | Invertivore | Oviparous | Duellman WE (1978) The biology of an equatorial herpetofauna in Amazonian Ecuador. <i>Misc Publ Mus Nat Hist Univ Kansas</i> 65:1–352.; Avila-Pires TCS (1995) Lizards of Brazilian Amazonia (Reptilia: Squamata). <i>Zool Verh</i> 299:1–706.; Wiens JJ, Etheridge RE (2003) Phylogenetic relationships of hoplocercid lizards: Coding and combining meristic, morphometric, and polymorphic data using step matrices. <i>Herpetologica</i> 59:375–398.                                                                                       |
| <i>Eublepharis macularius</i> | Terrestrial   | Ground dweller         | Invertivore | Oviparous | Bonke R, Böhme W, Opiela K, Rödder D (2011) A remarkable case of cannibalism in juvenile Leopard Geckos, <i>Eublepharis macularius</i> (Blyth, 1854) (Squamata: Eublepharidae). <i>Herpetol Notes</i> 4:211–212.; Fuller PO, Higham TE, Clark AJ (2011) Posture, speed, and habitat structure: three-dimensional hindlimb kinematics of two species of padless geckos. <i>Zool</i> 114:104–112.; Pyron RA, Burbrink FT (2013) Early origin of viviparity and multiple reversions to oviparity in squamate reptiles. <i>Ecol Lett</i> 17:13–21. |
| <i>Eugongylus rufescens</i>   | Leaf litter   | Litter dweller         | Unknown     | Oviparous | Heatwole H (1975) Biogeography of reptiles on some of the islands and cays of Eastern Papua—New Guinea. <i>Atoll Res Bull</i> 180:1–32.; Cogger HG (2000) Reptiles & Amphibians of Australia (New Holland Publishers).; Pyron RA, Burbrink FT (2013) Early origin of viviparity and multiple reversions to oviparity in squamate reptiles. <i>Ecol Lett</i> 17:13–21.                                                                                                                                                                          |

|                                   |                        |                        |             |            |                                                                                                                                                                                                                                                                                                                                                                                                                                                                                           |
|-----------------------------------|------------------------|------------------------|-------------|------------|-------------------------------------------------------------------------------------------------------------------------------------------------------------------------------------------------------------------------------------------------------------------------------------------------------------------------------------------------------------------------------------------------------------------------------------------------------------------------------------------|
| <i>Scincopus fasciatus</i>        | Terrestrial            | Ground dweller         | Invertivore | Oviparous  | Schleich HH, Kastle W, Kabisch K (1996) Amphibians and Reptiles of North Africa (Koeltz Scientific Publishers.); Hecnar SJ, M'Closkey RT (1998) Effects of human disturbance on Five-lined skink, <i>Eumeces fasciatus</i> , abundance and distribution. <i>Biol Conserv</i> 85:213–222.; Steward JR, Florian JD Jr (2000) Ontogeny of the extraembryonic membranes of the oviparous lizard, <i>Eumeces fasciatus</i> (Squamata: Scincidae). <i>J Morphol</i> 244:81–107.                 |
| <i>Feylinia polylepis</i>         | Fossorial              | Digger                 | Unknown     | Viviparous | Gans C (1975) Tetrapod limblessness: Evolution and function corollaries. <i>Amer Zool</i> 15:455–467.; Greer A (2007) The Biology and Evolution of Scincid Lizards (Chipping Norton); Pyron RA, Burbrink FT (2013) Early origin of viviparity and multiple reversions to oviparity in squamate reptiles. <i>Ecol Lett</i> 17:13–21.                                                                                                                                                       |
| <i>Gallotia galloti</i>           | Terrestrial saxicolous | Ground dweller         | Omnivore    | Oviparous  | Valido A, Nogales M, Medina FM (2003) Fleshy fruits in the diet of Canarian lizards <i>Gallotia galloti</i> (Lacertidae) in a xeric habitat of the Island of Tenerife. <i>J Herpetol</i> 37:741–747.; Pyron RA, Burbrink FT (2013) Early origin of viviparity and multiple reversions to oviparity in squamate reptiles. <i>Ecol Lett</i> 17:13–21.                                                                                                                                       |
| <i>Gambelia wislizenii</i>        | Terrestrial            | Ground dweller         | Carnivore   | Oviparous  | Schorr RA, Lambert BA, Freels E (2011) Habitat use and home range of Long-nosed Leopard lizards ( <i>Gambelia wislizenii</i> ) in Canyons of the Ancients National Monument, Colorado. <i>Herpetol Conserv Biol</i> 6:312–323.                                                                                                                                                                                                                                                            |
| <i>Gehyra mutilata</i>            | Arboreal               | Climber                | Invertivore | Oviparous  | Fisher RN (1997) Dispersal and evolution of the Pacific Basin gekkonid lizards <i>Gehyra oceanica</i> and <i>Gehyra mutilata</i> . <i>Evolution</i> 51:906–921. Barragán-Ramírez JL, Reyes-Luis OE, de Jesús Ascencio-Arrayga J, Navarrete-Heredia JL, Vásquez-Bolaños M (2015) Diet and reproductive aspects of the exotic gecko <i>Gehyra mutilata</i> (Wiegmann, 1834) (Sauria: Gekkonidae) in the urban area of Chapala, Jalisco, Mexico. <i>Acta Zool Mex, Nueva Serie</i> 31:67–73. |
| <i>Gekko gecko</i>                | Arboreal               | Climber                | Invertivore | Oviparous  | Meshaka WE Jr., Clouse RM, McMahon L (1997) Diet of the Tokay gecko ( <i>Gekko gecko</i> ) in southern Florida. <i>Florida Field Nat</i> 25:105–107.; Pyron RA, Burbrink FT (2013) Early origin of viviparity and multiple reversions to oviparity in squamate reptiles. <i>Ecol Lett</i> 17:13–21.                                                                                                                                                                                       |
| <i>Geocalamus acutus</i>          | Fossorial              | Digger                 | Invertivore | Oviparous  | Spawls S, Howell K, Drewes R, Ashe J (2002) Reptiles of East Africa (Academic Press); Kearney M, Stuart BL (2004) Repeated evolution of limblessness and digging heads in worm lizards revealed by DNA from old bones. <i>Proc R Soc Lon B</i> 271:1677–1683.                                                                                                                                                                                                                             |
| <i>Gonatodes albogularis</i>      | Semi-arboreal          | Ground dweller/climber | Invertivore | Oviparous  | Krysko KL (2005) Ecological status of the introduced Yellow-headed gecko, <i>Gonatodes albogularis</i> (Sauria: Gekkonidae), in Florida. <i>Florida Scientist</i> 68:272–280.                                                                                                                                                                                                                                                                                                             |
| <i>Gymnophthalmus leucomystax</i> | Terrestrial            | Ground dweller         | Invertivore | Oviparous  | Pyron RA, Burbrink FT (2013) Early origin of viviparity and multiple reversions to oviparity in squamate reptiles. <i>Ecol Lett</i> 17:13–21.; Ribeiro MA Jr. (2017) Catalogue of distribution of                                                                                                                                                                                                                                                                                         |

|                                  |                |                        |             |           |                                                                                                                                                                                                                                                                                                                                                                                                                                                                                                                          |
|----------------------------------|----------------|------------------------|-------------|-----------|--------------------------------------------------------------------------------------------------------------------------------------------------------------------------------------------------------------------------------------------------------------------------------------------------------------------------------------------------------------------------------------------------------------------------------------------------------------------------------------------------------------------------|
|                                  |                |                        |             |           | lizards (Reptilia: Squamata) from the Brazilian Amazonia. IV. Alopoglossidae, Gymnophthalmidae. <i>Zootaxa</i> 4269:151–196.                                                                                                                                                                                                                                                                                                                                                                                             |
| <i>Heloderma horridum</i>        | Semi-arboreal  | Ground dweller/climber | Carnivore   | Oviparous | Beck DD, Lowe CH (1991) Ecology of the Beaded lizard, <i>Heloderma horridum</i> , in a tropical dry forest in Jalisco, México. <i>J Herpetol</i> 25:395–406.                                                                                                                                                                                                                                                                                                                                                             |
| <i>Hemidactylus mabouia</i>      | Arboreal       | Climber                | Invertivore | Oviparous | Bonfiglio F, Lucchesi Balestrin R, Cappellari L (2007) Diet of <i>Hemidactylus mabouia</i> (Sauria, Gekkonidae) in urban area of southern Brazil. <i>Biociencias</i> 14:107–111.; Pyron RA, Burbrink FT (2013) Early origin of viviparity and multiple reversions to oviparity in squamate reptiles. <i>Ecol Lett</i> 17:13–21.; Malonza PK, Bauer AM (2014) A new species of arboreal forest-dwelling gecko ( <i>Hemidactylus</i> : Squamata: Gekkonidae) from coastal Kenya, East Africa. <i>Zootaxa</i> 3786:192–200. |
| <i>Holaspis guentheri</i>        | Arboreal       | Climber/glider         | Invertivore | Oviparous | Arnold EN (2002) <i>Holaspis</i> , a lizard that glided by accident: Mosaics of cooption and adaptation in a tropical forest lacertid (Reptilia, Lacertidae). <i>Bull Nat Hist Mus Lond (Zool)</i> 68:155–163.; Spawls S, Howell K, Drewes R, Ashe J (2002) Reptiles of East Africa (Academic Press).                                                                                                                                                                                                                    |
| <i>Lacerta viridis</i>           | Terrestrial    | Ground dweller         | Invertivore | Oviparous | Angelici FM, Luiselli L, Rugiero L (1997) Food habits of the Green lizard, <i>Lacerta bilineata</i> , in central Italy and a reliability test of faecal pellet analysis. <i>Ital J Zool</i> 64:267–272.                                                                                                                                                                                                                                                                                                                  |
| <i>Lanthanotus borneensis</i>    | Semi-aquatic   | Ground dweller/swimmer | Invertivore | Oviparous | Das I (2010) A Field Guide to the Reptiles of South-east Asia (New Holland Publishers).; Pyron RA, Burbrink FT (2013) Early origin of viviparity and multiple reversions to oviparity in squamate reptiles. <i>Ecol Lett</i> 17:13–21.; Langner C (2017) Hidden in the heart of Borneo-shedding light on some mysteries of an enigmatic lizard: First records of habitat use, behavior, and food items of <i>Lanthanotus borneensis</i> Steindachner, 1878 in its natural habitat. <i>Russ J Herpetol</i> 24:1–10.       |
| <i>Leiocephalus barahonensis</i> | Terrestrial    | Ground dweller         | Omnivore    | Oviparous | Schwartz A, Henderson RW (1991) Amphibians and Reptiles of the West Indies (University of Florida Press).; Gifford ME, Herrel A, Mahler DL (2008) The evolution of locomotor morphology, performance, and anti-predator behavior among populations of <i>Leiocephalus</i> lizards from the Dominican Republic. <i>Biol J Linn Soc</i> 93:445–456.; Melstrom KM (2017) The relationship between diet and tooth complexity in living dentigerous saurian. <i>J Morphol</i> 278:500–522.                                    |
| <i>Leiolepis belliana</i>        | Semi-fossorial | Ground dweller/digger  | Omnivore    | Oviparous | Cooper WE (2009) Food chemical discrimination by the omnivorous lizard <i>Leiolepis belliana</i> . <i>J Herpetol</i> 37:189–190.; Grismer JL, et al. (2014) Multiple origins of parthenogenesis, and a revised species phylogeny for the Southeast Asian Butterfly lizards, <i>Leiolepis</i> . <i>Biol J Linn Soc</i> 113:1080–1093.                                                                                                                                                                                     |
| <i>Leiosaurus catamarcensis</i>  | Terrestrial    | Ground dweller         | Carnivore   | Oviparous | Scolaro A (2005) Reptiles Patagónicos Sur: Una Guía de Campo (Universidad Nacional de la Patagonia).; Laspiur A, Acosta JC, Abdala CS (2007) A new species of <i>Leiosaurus</i> (Iguania:                                                                                                                                                                                                                                                                                                                                |

|                                    |                        |                       |             |               |                                                                                                                                                                                                                                                                                                                                                                                                                                                                                                                                                                                                                                     |
|------------------------------------|------------------------|-----------------------|-------------|---------------|-------------------------------------------------------------------------------------------------------------------------------------------------------------------------------------------------------------------------------------------------------------------------------------------------------------------------------------------------------------------------------------------------------------------------------------------------------------------------------------------------------------------------------------------------------------------------------------------------------------------------------------|
|                                    |                        |                       |             |               | Leiosauridae) from central-western Argentina. <i>Zootaxa</i> 1470:47–57.; Abdala V, Tulli MJ, Russell AP, Powell GL, Curz FB (2014) Anatomy of the crus and pes of neotropical iguanian lizards in relation to habitat use and digitally based grasping capabilities. <i>Anat Rec</i> 297:397–409.                                                                                                                                                                                                                                                                                                                                  |
| <i>Lialis burtonis</i>             | Leaf litter            | Litter dweller        | Carnivore   | Oviparous     | Wall M, Shine R (2013) Ecology and behaviour of Burton’s Legless lizard ( <i>Lialis burtonis</i> , Pygopodidae) in tropical Australia. <i>Asian Herpetol Res</i> 4:9–21.                                                                                                                                                                                                                                                                                                                                                                                                                                                            |
| <i>Liolaemus bellii</i>            | Terrestrial/saxicolous | Ground dweller        | Omnivore    | Ovoviviparous | Celedón-Neghme C, San Martín LA, Victoriano PF, Cavieresa LA (2008) Legitimate seed dispersal by lizards in an alpine habitat: The case of <i>Berberis empetrifolia</i> (Berberidaceae) dispersed by <i>Liolaemus bellii</i> [sic] (Tropiduridae). <i>Acta Oecologia</i> 33:265–271.                                                                                                                                                                                                                                                                                                                                                |
| <i>Lygodactylus picturatus</i>     | Arboreal               | Climber               | Invertivore | Oviparous     | Greer AE (1967) The ecology and behavior of two sympatric <i>Lygodactylus</i> geckos. <i>Breviora</i> 268:1–19.; Hardy LM, Crnkovic AC (2006) Diet of amphibians and reptiles from the Engare Ondare river region of central Kenya, during the dry season. <i>Afr J Herpetol</i> 55:143–159.                                                                                                                                                                                                                                                                                                                                        |
| <i>Trachylepis quinquetaeniata</i> | Terrestrial saxicolous | Ground dweller        | Invertivore | Oviparous     | Pyron RA, Burbrink FT (2013) Early origin of viviparity and multiple reversions to oviparity in squamate reptiles. <i>Ecol Lett</i> 17:13–21.; Kadry MAM, Mohamed HRH, Hosney M (2017) Ecological and biological studies on Five-lined skink, <i>Trachylepis</i> (= <i>Mabuya</i> ) <i>quinquetaeniata</i> inhabiting two different habitats in Egypt. <i>Cell Mol Biol</i> 63:28–36.                                                                                                                                                                                                                                               |
| <i>Monopeltis capensis</i>         | Fossorial              | Digger                | Invertivore | Viviparous    | Broadley DG, Gans C, Visser J (1976) Studies on amphisbaenians (Amphisbaenia Reptilia). 6. The genera <i>Monopeltis</i> and <i>Dalophia</i> in Southern Africa. <i>Bull Am Mus Nat Hist</i> 2:38–39.; Branch B (1998) Field Guide to the Snakes and Other Reptiles of Southern Africa (Struik).; Webb JK, Shine R, Branch WR, Harlow PS (2000) Life underground: Food habits and reproductive biology of two amphisbaenian species from Southern Africa. <i>J Herpetol</i> 34:510–516.; Maritz B, Alexander GJ (2008) Breaking ground: Quantitative fossorial herpetofaunal ecology in South Africa. <i>Afr J Herpetol</i> 58:1–14. |
| <i>Morunasaurus annularis</i>      | Semi-fossorial         | Ground dweller/digger | Invertivore | Oviparous     | Köhler G, Seipp R, Moya S, Almendáriz A (1999) Zur Kenntnis von <i>Morunasaurus annularis</i> (O’Shaughnessy, 1881). <i>Salamandra, Rheinbach</i> 35:181–190.                                                                                                                                                                                                                                                                                                                                                                                                                                                                       |
| <i>Nephruerus levis</i>            | Terrestrial            | Ground dweller/digger | Invertivore | Oviparous     | Pianka ER, Pianka HD (1976) Comparative ecology of twelve species of nocturnal lizards (Gekkonidae) in the Western Australian Desert. <i>Copeia</i> 1976:125–142.; How RA, Dell J, Wellington BD (1990) Reproductive and dietary biology of <i>Nephruerus</i> and <i>Underwoodisaurus</i> (Gekkonidae) in Western Australia. <i>Rec West Aust Mus</i> 14:449–459.; Cogger HG (2000) Reptiles & Amphibians of Australia (New Holland Publishers).                                                                                                                                                                                    |
| <i>Nucras tessellata</i>           | Terrestrial            | Ground dweller        | Invertivore | Oviparous     | Huey RB, Pianka ER (1981) Ecological consequences of foraging mode. <i>Ecology</i> 62:991–999                                                                                                                                                                                                                                                                                                                                                                                                                                                                                                                                       |

|                               |             |                        |             |            |                                                                                                                                                                                                                                                                                                                                                                                                                                                                                                                    |
|-------------------------------|-------------|------------------------|-------------|------------|--------------------------------------------------------------------------------------------------------------------------------------------------------------------------------------------------------------------------------------------------------------------------------------------------------------------------------------------------------------------------------------------------------------------------------------------------------------------------------------------------------------------|
| <i>Oplurus cyclurus</i>       | Arboreal    | Climber                | Invertivore | Oviparous  | Brillet C (1982) Contribution a l'étude des relations entre individus chez cinq especes d'iguanes malgaches du genre <i>Oplurus</i> . <i>Rev Ecol (TerreVie)</i> 36:79–148.; Chan LM, Choi D, Raselimanana AP, Rakotondravony HA, Yoder AD (2012) Defining spatial and temporal patterns of phylogeographic structure in Madagascar's iguanid lizards (genus <i>Oplurus</i> ) <i>Molec Ecol</i> 21:3839–3851.; Glaw F, Vences M (2007) A Field Guide to the Amphibians and Reptiles of Madagascar (Vences & Glaw). |
| <i>Petrosaurus mearnsi</i>    | Saxicolous  | Ground dweller/Climber | Invertivore | Oviparous  | De Lisle HF (1991) Behavioral ecology of the Banded Rock lizard ( <i>Petrosaurus mearnsi</i> ). <i>Bull Southern Cal Acad Sci</i> 90:102–117.                                                                                                                                                                                                                                                                                                                                                                      |
| <i>Phelsuma lineata</i>       | Arboreal    | Climber                | Invertivore | Oviparous  | Nussbaum RA, Raxworthy CJ, Raselimanana AP, Ramanamanjato JB (2000) New species of Day Gecko, <i>Phelsuma</i> Gray (Reptilia: Squamata: Gekkonidae), from the Réserve Naturelle Intégrale d'Andohahela, Southern Madagascar. <i>Copeia</i> 2000:763–770.; Fölling M, Knogge C, Böhme W (2001) Geckos are milking honeydew-producing planthoppers in Madagascar. <i>J Nat Hist</i> 35:279–284.                                                                                                                      |
| <i>Pholidobolus montium</i>   | Terrestrial | Ground dweller         | Invertivore | Oviparous  | Montanucci RR (1973) Systematics and evolution of the Andean lizard genus <i>Pholidobolus</i> (Sauria: Teiidae). <i>Misc Publ Univ Kansas Mus Nat Hist</i> 59:1–52.; Bursley CR, Goldberg SR (2011) Helminths of <i>Pholidobolus montium</i> (Sauria: Gymnophthalmidae) from Ecuador with description of a new species of <i>Skrjabinodon</i> (Nematoda: Oxyuroidea: Pharyngodonidae). <i>J Parasitol</i> 97:94–96.                                                                                                |
| <i>Phrynosoma platyrhinos</i> | Terrestrial | Ground dweller         | Invertivore | Oviparous  | Pianka ER, Parker WS (1975) Ecology of horned lizards; a review with special reference to <i>Phrynosoma platyrhinos</i> . <i>Copeia</i> 1:141–162.; Birchard GF, Marcellini D (1996) Incubation time in reptilian eggs. <i>J Zool</i> 240:621–635.                                                                                                                                                                                                                                                                 |
| <i>Saltuarius cornutus</i>    | Arboreal    | Climber                | Invertivore | Oviparous  | Couper PJ, Gregson RAM (1994) Redescription of <i>Nephrurus asper</i> Günther and description of <i>N. amyae</i> sp. nov. and <i>N. sheai</i> sp. nov. <i>Mem Queensland Mus</i> 37:67–81.; Cogger HG (2000) Reptiles & Amphibians of Australia (New Holland Publishers).; Pyron RA, Burbrink FT (2013) Early origin of viviparity and multiple reversions to oviparity in squamate reptiles. <i>Ecol Lett</i> 17:13–21.                                                                                           |
| <i>Phymaturus palluma</i>     | Saxicolous  | Ground dweller/climber | Herbivore   | Viviparous | Vicenzi N, Massarelli R (2018) <i>Phymaturus palluma</i> (High Mountain lizard). Diet. <i>Herpetol Rev</i> 49:121.                                                                                                                                                                                                                                                                                                                                                                                                 |
| <i>Platysaurus capensis</i>   | Saxicolous  | Ground dweller/climber | Invertivore | Oviparous  | Whiting MJ, Greeff JM (1997) Facultative frugivory in the Cape Flat Lizard, <i>Platysaurus capensis</i> (Sauria: Cordylidae). <i>Copeia</i> 1997:811–818.; Greeff JM, Whiting MJ (2000) Foraging-mode plasticity in the lizard <i>Platysaurus broadleyi</i> . <i>Herpetologica</i> 56:402–407.; Pyron RA, Burbrink FT (2013) Early origin of viviparity and multiple reversions to oviparity in squamate reptiles. <i>Ecol Lett</i> 17:13–21.                                                                      |
| <i>Plica plica</i>            | Arboreal    | Climber                | Invertivore | Oviparous  | Goldberg SR, Bursley CR, Vitt LJ (2009) Diet and parasite communities of two lizard species, <i>Plica plica</i> and <i>Plica umbra</i> from Brazil and Ecuador. <i>J Herpetol</i> 19:49–52.; Pyron RA, Burbrink FT                                                                                                                                                                                                                                                                                                 |

|                                  |               |                        |             |           |                                                                                                                                                                                                                                                                                                                                                                                                                                                                                                                                                                                                                             |
|----------------------------------|---------------|------------------------|-------------|-----------|-----------------------------------------------------------------------------------------------------------------------------------------------------------------------------------------------------------------------------------------------------------------------------------------------------------------------------------------------------------------------------------------------------------------------------------------------------------------------------------------------------------------------------------------------------------------------------------------------------------------------------|
| <i>Pogona vitticeps</i>          | Semi-arboreal | Ground dweller/climber | Omnivore    | Oviparous | (2013) Early origin of viviparity and multiple reversions to oviparity in squamate reptiles. <i>Ecol Lett</i> 17:13–21.<br>Melville J, Harmon LJ, Losos JB (2006) Intercontinental community convergence of ecology and morphology in desert lizards. <i>Proc R Soc B</i> 273:557–563.; Pyron RA, Burbrink FT (2013) Early origin of viviparity and multiple reversions to oviparity in squamate reptiles. <i>Ecol Lett</i> 17:13–21.; Oonincx DG, van Leeuwen JP, Hendriks WH, van der Poel AF (2015) The diet of free-roaming Australian Central Bearded Dragons ( <i>Pogona vitticeps</i> ). <i>Zoo Biol</i> 34:271–277. |
| <i>Polychrus marmoratus</i>      | Arboreal      | Climber                | Invertivore | Oviparous | Avila-Pires TCS (1995) Lizards of Brazilian Amazonia (Reptilia: Squamata). <i>Zool Verh</i> 299:1–706.                                                                                                                                                                                                                                                                                                                                                                                                                                                                                                                      |
| <i>Pristidactylus torquatus</i>  | Terrestrial   | Ground dweller         | Invertivore | Oviparous | Donoso-Barros R (1964) Reptiles de Chile (Universidad de Chile).; Cei JM, Scolaro JA, Videla F (2001) The present status of Argentinian polychrotid species of the genus <i>Pristidactylus</i> and description of its southernmost taxon as a new species. <i>J Herpetol</i> 35:597–605.; Pyron RA, Burbrink FT (2013) Early origin of viviparity and multiple reversions to oviparity in squamate reptiles. <i>Ecol Lett</i> 17:13–21.                                                                                                                                                                                     |
| <i>Ptychozoon kuhli</i>          | Arboreal      | Climber/glider         | Invertivore | Oviparous | Vetter RS, Brodie ED, Jr. (1977) Background color selection and antipredator behavior of the Flying Gecko, <i>Ptychozoon kuhli</i> 33:464–467.; Das I (2010) A Field Guide to the Reptiles of Southeast Asia (New Holland Publishers).; Pyron RA, Burbrink FT (2013) Early origin of viviparity and multiple reversions to oviparity in squamate reptiles. <i>Ecol Lett</i> 17:13–21.                                                                                                                                                                                                                                       |
| <i>Rhacodactylus auriculatus</i> | Arboreal      | Climber                | Omnivore    | Oviparous | Snyder J, Snyder L, Bauer AM (2010) Ecological observations on the Gargoyle Gecko, <i>Rhacodactylus auriculatus</i> (Bavay, 1869), in southern New Caledonia. <i>Salamandra</i> 46:37–47.                                                                                                                                                                                                                                                                                                                                                                                                                                   |
| <i>Rieppeleon brevicaudatus</i>  | Terrestrial   | Ground dweller         | Invertivore | Oviparous | Spawls S, Howell K, Drewes R, Ashe J (2002) Reptiles of East Africa (Academic Press).; Riedel J, Böhme W, Bleckmann H, Spinner M (2015) Microornamentation of Leaf chameleons (Chamaeleonidae: <i>Brookesia</i> , <i>Rhampholeon</i> , and <i>Rieppeleon</i> )—with comments on the evolution of microstructures in Chamaeleonidae. <i>J Morphol</i> 276:167–184.                                                                                                                                                                                                                                                           |
| <i>Rhineura floridana</i>        | Fossorial     | Digger                 | Invertivore | Oviparous | Conant R (1975) A Field Guide to the Reptiles and Amphibians of Eastern and Central North America (Houghton Mifflin Company).; Bursey CR (2002) <i>Paradollfusnema tefordi</i> n. sp. (Nematoda: Cosmocercidae) from the worm lizard, <i>Rhineura floridana</i> (Amphisbaenia), of Florida. <i>J Parasitol</i> 88:554–556.; Pyron RA, Burbrink FT (2013) Early origin of viviparity and multiple reversions to oviparity in squamate reptiles. <i>Ecol Lett</i> 17:13–21.                                                                                                                                                   |
| <i>Sceloporus variabilis</i>     | Terrestrial   | Ground dweller         | Invertivore | Oviparous | Conant R (1975) A Field Guide to the Reptiles and Amphibians of Eastern and Central North America (Houghton Mifflin Company).; Benabib M (1994) Reproduction and lipid utilization of tropical populations of <i>Sceloporus variabilis</i> . <i>Herpetol Monogr</i> 8:160–180.; Granados-González G, Villagrán-SantaCruz M, Peña-Herrera E,                                                                                                                                                                                                                                                                                 |

|                                 |              |                        |             |            |                                                                                                                                                                                                                                                                                                                                                                                                                                                                                                                                                                                                                                                                                                                                      |
|---------------------------------|--------------|------------------------|-------------|------------|--------------------------------------------------------------------------------------------------------------------------------------------------------------------------------------------------------------------------------------------------------------------------------------------------------------------------------------------------------------------------------------------------------------------------------------------------------------------------------------------------------------------------------------------------------------------------------------------------------------------------------------------------------------------------------------------------------------------------------------|
|                                 |              |                        |             |            | Rheubert JL, Gribbins KM, Hernández-Gallegos O (2017) Spermatogenesis in <i>Sceleoporus variabilis</i> (Squamata, Phrynosomatidae): A non-quiescent pattern. <i>Acta Zool</i> 100:43–52.                                                                                                                                                                                                                                                                                                                                                                                                                                                                                                                                             |
| <i>Scincus scincus</i>          | Fossorial    | Digger                 | Omnivore    | Oviparous  | Hetherington TE (1990) Behavioural use of seismic cues by the Sandswimming lizard <i>Scincus scincus</i> . <i>Ethol Ecol Evol</i> 4:5–14.; Schleich HH, Kastle W, Kabisch K (1996) Amphibians and Reptiles of North Africa (Koeltz Scientific Publishers).; Attum O, Covell C, Eason P (2004) The comparative diet of three Sharan sand dune skinks. <i>Afr J Herpetol</i> 53:91–94.                                                                                                                                                                                                                                                                                                                                                 |
| <i>Shinisaurus crocodilurus</i> | Semi-aquatic | Ground dweller/swimmer | Invertivore | Viviparous | Ziegler T, Quyet LK, Thanh VN, Hendrix R, Böhme W (2008) A comparative study of Crocodile lizards ( <i>Shinisaurus crocodilurus</i> Ahl, 1930) from Vietnam and China. <i>Raffles Bull Zool</i> 56:181–187.                                                                                                                                                                                                                                                                                                                                                                                                                                                                                                                          |
| <i>Sphenomorphus solomonis</i>  | Leaf litter  | Litter dweller         | Invertivore | Oviparous  | Thornton IWB, Cook S, Edwards JS, Harrison RD, Schipper C, Shanahan M, Singadan R, Yamuna R (2001) Colonization of an island volcano, Long Island, Papua New Guinea, and an emergent island. <i>J Biogeogr</i> 28:1389–1408.; Goldberg SR, Bursey CR, Kraus F (2009) Endoparasites in 12 species of <i>Sphenomorphus</i> (Squamata: Scincidae) from Papua New Guinea. <i>Comp Parasitol</i> 76:58–83.; Pyron RA, Burbrink FT (2013) Early origin of viviparity and multiple reversions to oviparity in squamate reptiles. <i>Ecol Lett</i> 17:13–21.; Zug GR (2013) Reptiles and Amphibians of the Pacific Islands: Comprehensive Guide (University of California Press).                                                            |
| <i>Stenocercus guentheri</i>    | Terrestrial  | Ground dweller         | Invertivore | Oviparous  | Torres-Carvajal O (2000) Ecuadorian lizards of the genus <i>Stenocercus</i> (Squamata: Tropiduridae). <i>Sci Papers Nat Hist Mus Univ Kansas</i> 15:1–38.; Pyron RA, Burbrink FT (2013) Early origin of viviparity and multiple reversions to oviparity in squamate reptiles. <i>Ecol Lett</i> 17:13–21.; Dávila-Jativa M, Cisneros-Heredia D (2017) Use of human-made building by <i>Stenocercus</i> lizards (Iguania, Tropiduridae). <i>Herpetol Notes</i> 10:517–519.                                                                                                                                                                                                                                                             |
| <i>Takydromus sexlineatus</i>   | Terrestrial  | Ground dweller         | Invertivore | Oviparous  | Das I (2010) A Field Guide to the Reptiles of South-east Asia (New Holland Publishers).; Cooper WE, Paulissen MA, habegger JJ (2000) Discrimination of prey, but no plant, chemicals by actively foraging, insectivorous lizards, the lacertid <i>Takydromus sexlineatus</i> and the teiid <i>Cnemidophorus gularis</i> . <i>J Chem Ecol</i> 26:1623–1634.; Pyron RA, Burbrink FT (2013) Early origin of viviparity and multiple reversions to oviparity in squamate reptiles. <i>Ecol Lett</i> 17:13–21.; Hawkeswood TJ, Sommung B (2017) A record of the Long-tailed Lizard, <i>Takydromus sexlineatus</i> (Daudin, 1802) (Reptilia: Lacertidae) from the farming district of Ubon Ratchathani, Thailand. <i>Calodema</i> 564:1–3. |
| <i>Teius teyou</i>              | Terrestrial  | Ground dweller         | Omnivore    | Oviparous  | Milstead WW (1961) Notes on teiid lizards in Southern Brazil. <i>Copeia</i> 1961:493–495.; Packard GC, Tracy CR, Roth JJ (1977) The physiological ecology of reptilian eggs and embryos and the evolution of viviparity within the class Reptilia. <i>Biol Rev</i> 52:71–105.; Varela RO, Bucher EH (2002) The lizard <i>Teius teyou</i>                                                                                                                                                                                                                                                                                                                                                                                             |

|                                  |             |                       |             |            |                                                                                                                                                                                                                                                                                                                                                                                                                                                                                       |
|----------------------------------|-------------|-----------------------|-------------|------------|---------------------------------------------------------------------------------------------------------------------------------------------------------------------------------------------------------------------------------------------------------------------------------------------------------------------------------------------------------------------------------------------------------------------------------------------------------------------------------------|
|                                  |             |                       |             |            | (Squamata: Teiidae) as a legitimate seed disperser in the dry Chaco forest of Argentina. <i>Studies on Neotropical Fauna and Environment</i> 36:115–117.                                                                                                                                                                                                                                                                                                                              |
| <i>Teratoscincus przewalskii</i> | Terrestrial | Ground dweller        | Invertivore | Oviparous  | Semenov DV, Borkin LJ (1992) On the ecology of Przewalsky's Gecko ( <i>Teratoscincus przewalskii</i> ) in the Transaltai Gobi, Mongolia. <i>Asiatic Herpetol Res</i> 4:99–112.                                                                                                                                                                                                                                                                                                        |
| <i>Tiliqua scincoides</i>        | Terrestrial | Ground dweller        | Omnivorous  | Viviparous | Koenig J, Shine R, Shea G (2001) The ecology of an Australian reptile icon: How do Blue-tongued lizards ( <i>Tiliqua scincoides</i> ) survive in suburbia? <i>Wildlife Res</i> 28:215–227.                                                                                                                                                                                                                                                                                            |
| <i>Trogonophis wiegmanni</i>     | Fossorial   | Digger                | Invertivore | Viviparous | Martin J, Ortega Gimenez J, Lopez P, Perez-Cembranos A (2013) Fossorial life does not constrain diet selection in the amphibiaenian <i>Trogonophis wiegmanni</i> . <i>J Zool</i> 291:226–233.; Pyron RA, Burbrink FT (2013) Early origin of viviparity and multiple reversions to oviparity in squamate reptiles. <i>Ecol Lett</i> 17:13–21.                                                                                                                                          |
| <i>Tupinambis teguixin</i>       | Terrestrial | Ground dweller        | Omnivore    | Oviparous  | Presch W (1973) A review of the Tegu, lizard genus <i>Tupinambis</i> (Sauria: Teiidae) from South America. <i>Copeia</i> 1973:740–746.; Packard GC, Tracy CR, Roth JJ (1977) The physiological ecology of reptilian eggs and embryos and the evolution of viviparity within the class Reptilia. <i>Biol Rev</i> 52:71–105.; Mercolli C, Yanosky A (1994) The diet of adult <i>Tupinambis teguixin</i> (Sauria: Teiidae) in the eastern Chaco of Argentina. <i>J Herpetol</i> 4:15–19. |
| <i>Acontias plumbeus</i>         | Fossorial   | Digger                | Invertivore | Viviparous | Broadley DG, Greer AE (1969) A revision of the genus <i>Acontias</i> Cuvier (Sauria: Scincidae). <i>Arnoldia</i> 36:1–20.; Pyron RA, Burbrink FT (2013) Early origin of viviparity and multiple reversions to oviparity in squamate reptiles. <i>Ecol Lett</i> 17:13–21.; Bolet A, Augé M (2014) A new miniaturized lizard from the Late Eocene of France and Spain. <i>Anat Rec</i> 297:505–515.                                                                                     |
| <i>Uma scoparia</i>              | Terrestrial | Ground dweller/digger | Omnivore    | Oviparous  | Carpenter CC (1963) Patterns of behavior in three forms of the Fringe-toed lizards ( <i>Uma</i> -Iguanidae). <i>Copeia</i> 1963:406–412.; Mayhew WW (1966) Reproduction in the Psammophilus lizard <i>Uma scoparia</i> . <i>Copeia</i> 1966:114–122.; Gadsen HE, Palacios-Orona LE (1997) Seasonal dietary patterns of the Mexican Fringe-toed lizard ( <i>Uma paraphygas</i> ). <i>J Herpetol</i> 31:1–9.                                                                            |
| <i>Uranoscodon superciliosus</i> | Arboreal    | Climber               | Invertivore | Oviparous  | Howland JM, Vitt LJ, Lopez PT (1990) Life on the edge: The ecology and life history of the tropidurine iguanid lizard <i>Uranoscodon superciliosum</i> . <i>Can J Zool</i> 68:1366–1373.; Avila-Pires TCS (1995) Lizards of Brazilian Amazonia (Reptilia: Squamata). <i>Zool Verh</i> 299:1–706.                                                                                                                                                                                      |
| <i>Uromastix aegyptia</i>        | Terrestrial | Ground dweller        | Herbivore   | Oviparous  | Castilla AM, Richer R, Herre A, Conkey A, Tribuna J, Al-Thani M (2011) First evidence of scavenging behaviour in the herbivorous lizard <i>Uromastix aegyptia microlepis</i> . <i>J Arid Environm</i> 75:671–673.; Pyron RA, Burbrink FT (2013) Early origin of viviparity and multiple reversions to oviparity in squamate reptiles. <i>Ecol Lett</i> 17:13–21.                                                                                                                      |



|                             |                        |                        |             |            |                                                                                                                                                                                                                                                                                                                                                                                                                                                                                                                                                                                                                                                                                                                                                                              |
|-----------------------------|------------------------|------------------------|-------------|------------|------------------------------------------------------------------------------------------------------------------------------------------------------------------------------------------------------------------------------------------------------------------------------------------------------------------------------------------------------------------------------------------------------------------------------------------------------------------------------------------------------------------------------------------------------------------------------------------------------------------------------------------------------------------------------------------------------------------------------------------------------------------------------|
| <i>Uroplatus lineatus</i>   | Arboreal               | Climber                | Invertivore | Oviparous  | Glaw F, Vences M (2007) A Field Guide to the Amphibians and Reptiles of Madagascar (Vences & Glaw).; Raxworthy CJ, et al. (2008) Continental speciation in the tropics: Contrasting biogeographic patterns of divergence in the <i>Uroplatus</i> Leaf-tailed gecko radiation of Madagascar. <i>J Zool</i> 275:423–440.; Pyron RA, Burbrink FT (2013) Early origin of viviparity and multiple reversions to oviparity in squamate reptiles. <i>Ecol Lett</i> 17:13–21.; McAllister CT, Scott Seville R, Hartdegen R (2016) Two new species of coccidia (Apicomplexa: Eimeriidae) from Leaf-tailed geckos, <i>Uroplatus</i> spp. (Sauria: Gekkonidae) from Madagascar, including a new host of <i>Eimeria brygooi</i> Upton & Barnard, 1987. <i>Syst Parasitol</i> 93:815–823. |
| <i>Urostrophus vautieri</i> | Arboreal               | Climber                | Invertivore | Oviparous  | Henle K, Knogge C (2009) Water-filled bromeliad as roost site of a tropical lizard, <i>Urostrophus vautieri</i> (Sauria: Leiosauridae) <i>Stud Neotrop Fauna Environ</i> 44(3):161–162.; Novelli I, Morton G, Tadeu Trinidad I, Frierio-Costa FA. 2013. <i>Urostrophus vautieri</i> (Brazilian Steppe iguana). <i>Diet. Herpetol Rev</i> 44:516.; Pyron RA, Burbrink FT (2013) Early origin of viviparity and multiple reversions to oviparity in squamate reptiles. <i>Ecol Lett</i> 17:13–21.                                                                                                                                                                                                                                                                              |
| <i>Uta stansburiana</i>     | Terrestrial            | Ground dweller         | Invertivore | Oviparous  | Davis J, Verbeek NAM (1972) Habitat preferences and the distribution of <i>Uta stansburiana</i> and <i>Sceloporus occidentalis</i> in coastal California. <i>Copeia</i> 1972:643–649.; Best TL, Gennaro AL (1984) Feeding ecology of the lizard, <i>Uta stansburiana</i> , in Southeastern New Mexico. <i>J Herpetol</i> 18:291–301.                                                                                                                                                                                                                                                                                                                                                                                                                                         |
| <i>Varanus salvator</i>     | Semi-aquatic           | Ground dweller/swimmer | Carnivore   | Oviparous  | Pyron RA, Burbrink FT (2013) Early origin of viviparity and multiple reversions to oviparity in squamate reptiles. <i>Ecol Lett</i> 17:13–21.; Karunarathna DMSS, Surasinghe TD, De Silva MC, Madawala MB, Gabadage DE, Botejue WMS (2015) Dietary habits of <i>Varanus salvator salvator</i> in Sri Lanka with a new record of predation on an introduced Clown knifefish, <i>Chitala ornata</i> . <i>Herpetol Bull</i> 133:23–28.                                                                                                                                                                                                                                                                                                                                          |
| <i>Xantusia vigilis</i>     | Terrestrial saxicolous | Ground dweller/climber | Invertivore | Viviparous | Miller MR (1951) Some aspects of the life history of the Yucca Night lizard, <i>Xantusia vigilis</i> . <i>Copeia</i> 1951:114–120.; Packard GC, Tracy CR, Roth JJ (1977) The physiological ecology of reptilian eggs and embryos and the evolution of viviparity within the class Reptilia. <i>Biol Rev</i> 52:71–105.                                                                                                                                                                                                                                                                                                                                                                                                                                                       |
| <i>Xenosaurus grandis</i>   | Saxicolous             | Ground dweller/climber | Invertivore | Viviparous | Packard GC, Tracy CR, Roth JJ (1977) The physiological ecology of reptilian eggs and embryos and the evolution of viviparity within the class Reptilia. <i>Biol Rev</i> 52:71–105.; Ballinger RE, Lemos-Espinal JA, Sanoja-Sarabia S, Coady NR (1995) Ecological observations of the lizard, <i>Xenosaurus grandis</i> in Cuautlapán, Veracruz, México. <i>Biotropica</i> 27:128–132.                                                                                                                                                                                                                                                                                                                                                                                        |
| <i>Zonosaurus ornatus</i>   | Terrestrial            | Ground dweller         | Invertivore | Oviparous  | Packard GC, Tracy CR, Roth JJ (1977) The physiological ecology of reptilian eggs and embryos and the evolution of viviparity within the class Reptilia. <i>Biol Rev</i> 52:71–105.; Meier H (1988) Zur Ökologie,                                                                                                                                                                                                                                                                                                                                                                                                                                                                                                                                                             |

|                               |                |                         |             |            |                                                                                                                                                                                                                                                                                                                                                                                                                                                                                                                |
|-------------------------------|----------------|-------------------------|-------------|------------|----------------------------------------------------------------------------------------------------------------------------------------------------------------------------------------------------------------------------------------------------------------------------------------------------------------------------------------------------------------------------------------------------------------------------------------------------------------------------------------------------------------|
|                               |                |                         |             |            | Ethologie und Taxonomie einiger Schildechsen der Gattungen <i>Tracheloptychus</i> und <i>Zonosaurus</i> auf Madagaskar. <i>Herpeto fauna (Münster)</i> , 10(57):22–26.; Recknagel H, et al. (2013) Multi-gene phylogeny of Madagascar's Plated lizards, <i>Zonosaurus</i> and <i>Tracheloptychus</i> (Squamata: Gerrhosauridae). <i>Mol Phylogenet Evol</i> 69:1215–1221.                                                                                                                                      |
| <i>Acrochordus granulatus</i> | Aquatic        | Swimmer                 | Carnivore   | Viviparous | Voris HK, Glodeck GS (1980) Habitat, diet, and reproduction of the File snake, <i>Acrochordus granulatus</i> , in the Straits of Malacca. <i>J Herpetol</i> 14:108–111.                                                                                                                                                                                                                                                                                                                                        |
| <i>Afronatrix anoscopus</i>   | Semi-aquatic   | Ground dweller/ Swimmer | Carnivore   | Oviparous  | Luiselli L, Akani GC, Angelici MA, Politano E, Ude L, Wariboko SM (2003) Diet of the semi-aquatic snake, <i>Afronatrix anoscopus</i> (Colubridae) in southern Nigeria. <i>Afr J Herpetol</i> 52:123–126.; Pyron RA, Burbrink FT (2013) Early origin of viviparity and multiple reversions to oviparity in squamate reptiles. <i>Ecol Lett</i> 17:13–21.                                                                                                                                                        |
| <i>Agkistrodon contortrix</i> | Terrestrial    | Ground dweller          | Carnivore   | Viviparous | Smith CF, Schuett GW, Earley RL, Schwenk K (2009) The spatial and reproductive ecology of the Copperhead ( <i>Agkistrodon contortrix</i> ) at the northeastern extreme of its range. <i>Herpetological Monographs</i> 23:45–73.; Garton JS, Dimmick RW (1969) Food habits of the Copperhead in middle Tennessee. <i>J Tenn Acad Sci</i> 44:113–117; Fitch HS (1982) Resources of a snake community in prairie–woodland habitat of northeastern Kansas. <i>Herpetological Communities</i> , ed Scott NJ, 83–98. |
| <i>Amphiesma stolatum</i>     | Terrestrial    | Ground dweller          | Carnivore   | Oviparous  | Pryce D, Thorpe CJ, Kulkarni S, Lewis TR (2016) <i>Amphiesma stolatum</i> (Striped keelback): Habitat and reproduction. <i>The Herpetological Bulletin</i> 136:37–38.; Baruah M, Das M, Sengupta S (2001) Food and feeding of <i>Amphiesma stolatum</i> (Linnaeus 1758). <i>J Environm Biol</i> 22:315–317.                                                                                                                                                                                                    |
| <i>Anilius scytale</i>        | Terrestrial    | Ground dweller          | Carnivore   | Viviparous | Maschio GF, da Costa Prudente AL, de Lima AC, Feitosa DT (2007) Reproductive Biology of <i>Anilius scytale</i> (Linnaeus 1758) (Serpentes, Aniliidae) from Eastern Amazonia, Brazil. <i>South Am J Herpetol</i> 2:179–183.; Maschio GF, Prudente ALC, Rodrigues FS, Hoogmoed MS (2010) Food habits of <i>Anilius scytale</i> (Serpentes: Aniliidae) in the Brazilian Amazonia. <i>Zoologia</i> 27:184–190.                                                                                                     |
| <i>Anomochilus leonardi</i>   | Fossorial      | Digger                  | Unknown     | Oviparous  | Stuebing RB, Goh R (1993) A new record of Leonard's pipe snake, <i>Anomochilus leonardi</i> Smith (Serpentes: Uropeltidae: Cyliodrophinae) from Sabah, North Western Borneo. <i>Raffles Bull Zool</i> 41:311–314.; Pyron RA, Burbrink FT (2013) Early origin of viviparity and multiple reversions to oviparity in squamate reptiles. <i>Ecol Lett</i> 17:13–21.                                                                                                                                               |
| <i>Aparallactus modestus</i>  | Semi-fossorial | Ground dweller/digger   | Invertivore | Oviparous  | Luiselli L, Akani GC, Rugiero L, Politano E (2005) Relationships between body size, population abundance and niche characteristics in the communities of snakes from three habitats in southern Nigeria. <i>J Zool Lond</i> 265:207–213.; Pyron RA, Burbrink FT (2013) Early origin of viviparity and multiple reversions to oviparity in squamate reptiles. <i>Ecol Lett</i> 17:13–21.; Naik H (2017) The evolution of diet in                                                                                |

|                                 |               |                        |           |            |                                                                                                                                                                                                                                                                                                                                                                                                                                                                                                                                                                                                                                                                                                                                                                                                                                                                |
|---------------------------------|---------------|------------------------|-----------|------------|----------------------------------------------------------------------------------------------------------------------------------------------------------------------------------------------------------------------------------------------------------------------------------------------------------------------------------------------------------------------------------------------------------------------------------------------------------------------------------------------------------------------------------------------------------------------------------------------------------------------------------------------------------------------------------------------------------------------------------------------------------------------------------------------------------------------------------------------------------------|
|                                 |               |                        |           |            | the Lamprophiidae. PhD Dissertation. University of the Witwatersrand.                                                                                                                                                                                                                                                                                                                                                                                                                                                                                                                                                                                                                                                                                                                                                                                          |
| <i>Aspidites melanocephalus</i> | Terrestrial   | Ground dweller         | Carnivore | Oviparous  | Johnson CR, Webb GJW, Johnson C (1975) Thermoregulation in pythons—III. Thermal ecology and behavior of the Black-headed Rock Python, <i>Aspidites melanocephalus</i> . <i>Herpetologica</i> 31:326–332.; Charles N, Field R, Shine R (1985) Notes on the reproductive biology of Australian pythons, genera <i>Aspidites</i> , <i>Liasis</i> and <i>Morelia</i> . <i>Herpetol Rev</i> 16:45–48.; Shine R, Slip DJ (1990) Biological aspects of the adaptive radiation of Australasian pythons (Serpentes: Boidae). <i>Herpetologica</i> 46: 283–290; Tyler MJ, Edwards A, Johnston, GR (1990) Amphibians and reptiles. <i>Natural History of the North East Deserts</i> , eds Tyler MJ, Twidale CR, Davies M, Wells CB, 183–188.                                                                                                                              |
| <i>Atractaspis irregularis</i>  | Fossorial     | Digger                 | Carnivore | Oviparous  | Price RM (1982) Dorsal snake scale microdermatoglyphics: Ecological indicator or taxonomic tool? <i>J Herpetol</i> 16:294–306.; Deufel A, Cundall D (2003) Feeding in <i>Atractaspis</i> (Serpentes: Atractaspididae): A study in conflicting functional constraints. <i>Zool</i> 106:43–61.; Chirio L, LeBreton M (2007) Atlas des reptiles du Cameroun. Publications Scientifiques du Muséum National d'Histoire naturelle, vol. 67 (Naturelle & IRD Editions).; Pyron RA, Burbrink FT (2013) Early origin of viviparity and multiple reversions to oviparity in squamate reptiles. <i>Ecol Lett</i> 17:13–21.                                                                                                                                                                                                                                               |
| <i>Azemiops feae</i>            | Terrestrial   | Ground dweller         | Carnivore | Oviparous  | Orlov N, Ananjeva N, Khalikov R (2002) Natural history of pitvipers in Eastern and Southeastern Asia. <i>Biology of the Vipers</i> , eds Campbell JA, Brodies ED (Selva Publishing).                                                                                                                                                                                                                                                                                                                                                                                                                                                                                                                                                                                                                                                                           |
| <i>Bitis arietans</i>           | Terrestrial   | Ground dweller         | Carnivore | Viviparous | Pyron RA, Burbrink FT (2013) Early origin of viviparity and multiple reversions to oviparity in squamate reptiles. <i>Ecol Lett</i> 17:13–21.; Glaudas X, Kearney TC, Alexander G (2017) Museum specimens bias measures of snake diet: A case study using the ambush foraging Puff Adder ( <i>Bitis arietans</i> ). <i>Herpetologica</i> 73:121–128.                                                                                                                                                                                                                                                                                                                                                                                                                                                                                                           |
| <i>Boa constrictor</i>          | Semi-arboreal | Ground-dweller/climber | Carnivore | Viviparous | Attademo A, Bertona M, Kozykariski M, Chiaraviglio M (2004) Uso del hábitat por <i>Boa constrictor occidentalis</i> (Serpentes: Boidae) durante la estación seca en Córdoba, Argentina. <i>Cuadernos de Herpetología</i> 18:33–41.; Sironi M, Chiaraviglio M, Cervantes R, Bertona M, Rio M (2000) Dietary habits of <i>Boa constrictor occidentalis</i> , in the Cordoba Province, Argentina. <i>Amphibia-Reptilia</i> 21:226–232.; Boback SM (2004) Boa constrictor ( <i>Boa constrictor</i> ). Diet. <i>Herpetol Rev</i> 35:175.; Quick JS, Reinert HK, de Cuba ER, Odum RA (2005) Recent occurrence and dietary habits of <i>Boa constrictor</i> on Aruba, Dutch West Indies. <i>J Herpetol</i> 39:304–307.; Pyron RA, Burbrink FT (2013) Early origin of viviparity and multiple reversions to oviparity in squamate reptiles. <i>Ecol Lett</i> 17:13–21. |

|                              |                |                       |             |            |                                                                                                                                                                                                                                                                                                                                                                                                                                                                                                                                                                                                                                                                          |
|------------------------------|----------------|-----------------------|-------------|------------|--------------------------------------------------------------------------------------------------------------------------------------------------------------------------------------------------------------------------------------------------------------------------------------------------------------------------------------------------------------------------------------------------------------------------------------------------------------------------------------------------------------------------------------------------------------------------------------------------------------------------------------------------------------------------|
| <i>Bothrops asper</i>        | Terrestrial    | Ground dweller        | Carnivore   | Viviparous | Sasa M, Wasko DK, Lamar WW (2009) Natural history of the terciopelo <i>Bothrops asper</i> (Serpentes: Viperidae) in Costa Rica. <i>Toxicon</i> 54:904–922.; Pyron RA, Burbrink FT (2013) Early origin of viviparity and multiple reversions to oviparity in squamate reptiles. <i>Ecol Lett</i> 17:13–21.                                                                                                                                                                                                                                                                                                                                                                |
| <i>Calabaria reinhardtii</i> | Semi-fossorial | Ground dweller/Digger | Carnivore   | Oviparous  | Angelici FM, Inyang MA, Effah C, Luiselli L (2000) Analysis of activity patterns and habitat use of radiotracked African burrowing pythons, <i>Calabaria reinhardtii</i> . <i>Isr J Zool</i> 46:131–141.; Pyron RA, Burbrink FT (2013) Early origin of viviparity and multiple reversions to oviparity in squamate reptiles. <i>Ecol Lett</i> 17:13–21.                                                                                                                                                                                                                                                                                                                  |
| <i>Calliophis bivirgata</i>  | Leaf litter    | Litter dweller        | Carnivore   | Oviparous  | Kgaditse M (2016) The evolution and diversification of diet in elapids. PhD Dissertation. University of the Witwatersrand.; Das I (2010) A Field Guide to the Reptiles of South-east Asia (New Holland Publishers).; Sokolov AY (2003) On the morphofunctional peculiarities of the jaw apparatus of ophiophagous elapid snakes and on the some stages in evolution of Elapidae. <i>Herpetologia Petropolitana</i> , eds Ananjeva N, Tsinenko O, 307–309.; Pyron RA, Burbrink FT (2013) Early origin of viviparity and multiple reversions to oviparity in squamate reptiles. <i>Ecol Lett</i> 17:13–21.                                                                 |
| <i>Candoia carinata</i>      | Terrestrial    | Ground dweller        | Carnivore   | Viviparous | Harlow P, Shine R (1992) Food habits and reproductive biology of the Pacific Island Boas ( <i>Candoia</i> ). <i>J Herpetol</i> 26:60–66.                                                                                                                                                                                                                                                                                                                                                                                                                                                                                                                                 |
| <i>Casarea dussumieri</i>    | Terrestrial    | Ground dweller        | Carnivore   | Oviparous  | Vinson J (1949) L'île Ronde et l'île aux Serpents. <i>Proceedings of the Royal Society of Arts and Sciences Mauritius</i> 1:32–52.; Bullock DJ (1977) Round Island—A tale of destruction. <i>Oryx</i> 14: 51–58.; Pyron RA, Burbrink FT (2013) Early origin of viviparity and multiple reversions to oviparity in squamate reptiles. <i>Ecol Lett</i> 17:13–21.                                                                                                                                                                                                                                                                                                          |
| <i>Causus rhombeatus</i>     | Terrestrial    | Ground dweller        | Carnivore   | Oviparous  | Menzies JI (1966) The snakes of Sierra Leone. <i>Copeia</i> 1966: 169–179.; Ineich I, Bonnet X, Shine R, Shine T, Brishoux F, Lebreton M, Chirio L (2006) What, if anything, is a 'typical' viper? Biological attributes of basal viperid snakes (genus <i>Causus</i> Wagler, 1830). <i>Biol J Linn Soc</i> 89:575–588.;                                                                                                                                                                                                                                                                                                                                                 |
| <i>Coluber constrictor</i>   | Terrestrial    | Ground dweller        | Invertivore | Oviparous  | Packard GC, Tracy CR, Roth JJ (1977) The physiological ecology of reptilian eggs and embryos and the evolution of viviparity within the class Reptilia. <i>Biol Rev</i> 52:71–105.; Klimstra WD (1959) Foods of the Racer, <i>Coluber constrictor</i> , in Southern Illinois. <i>Copeia</i> 1959:210–214.; Shewchuk CH, Austin JD (2001) Food habits of the racer ( <i>Coluber constrictor</i> Mormon) in the northern part of its range. <i>Herpetological Journal</i> 11:151–155.; Brown WS (1973) Ecology of the racer, <i>Coluber constrictor</i> Mormon (Serpentes, Colubridae), in a cold temperate desert in northern Utah. PhD Dissertation. University of Utah. |
| <i>Cylindrophis ruffus</i>   | Semi-fossorial | Ground dweller/digger | Carnivore   | Viviparous | Greene HW (1983) Dietary correlates of the origin and radiation of snakes. <i>Integr Comp Biol</i> 23:431–441.; Houssaye A, Boistel R, Böhme W, Herrel A (2013) Jack-of-all-trades master of all? Snake vertebrae have a generalist inner organization. <i>Naturwissenschaften</i>                                                                                                                                                                                                                                                                                                                                                                                       |

|                             |               |                        |             |               |                                                                                                                                                                                                                                                                                                                                                                                                                                                                                                                                                                                                          |
|-----------------------------|---------------|------------------------|-------------|---------------|----------------------------------------------------------------------------------------------------------------------------------------------------------------------------------------------------------------------------------------------------------------------------------------------------------------------------------------------------------------------------------------------------------------------------------------------------------------------------------------------------------------------------------------------------------------------------------------------------------|
|                             |               |                        |             |               | 100:997–1006.; Pyron RA, Burbrink FT (2013) Early origin of viviparity and multiple reversions to oviparity in squamate reptiles. <i>Ecol Lett</i> 17:13–21.                                                                                                                                                                                                                                                                                                                                                                                                                                             |
| <i>Daboia russelii</i>      | Terrestrial   | Ground dweller         | Carnivore   | Ovoviviparous | Wuster W (1998) The genus <i>Daboia</i> (Serpentes: Viperidae): Russelus viper. <i>Hamadryad</i> 23:33–40.                                                                                                                                                                                                                                                                                                                                                                                                                                                                                               |
| <i>Diadophis punctatus</i>  | Terrestrial   | Ground dweller         | Carnivore   | Oviparous     | Bush FM (1959) Foods of some Kentucky herptiles. <i>Herpetologica</i> 15(2):73–77.; Myers CW (1965) Biology of the Ringneck Snake, <i>Diadophis punctatus</i> , in Florida. <i>Bull Florida State Mus</i> 10(2): Ernst CH, Ernst EM (2003) Snakes of the United States and Canada (Smithsonian Books).; Henderson RW (1970) Feeding behavior, digestion, and water requirements of <i>Diadophis punctatus armyi</i> Kennicott. <i>Herpetologica</i> 26:520–526.                                                                                                                                          |
| <i>Dipsas variegata</i>     | Arboreal      | Climber                | Invertivore | Oviparous     | Lotzkat S, Natera-Mumaw M, Hertz A, Sunyer J, Mora D (2008) New state records of <i>Dipsas variegata</i> (Duméril, Bibron and Duméril 1854) (Serpentes: Colubridae) from Northern Venezuela, with comments on natural history. <i>Herpetotropicos</i> 4(1):25–29.; Ray JM, Montgomery CE, Mahon HK, Savitzky AH, Lips KR (2012) Goo-eaters: Diets of the neotropical snakes <i>Dipsas</i> and <i>Sibon</i> in Central Panama. <i>Copeia</i> 2012:197–202.; Pyron RA, Burbrink FT (2013) Early origin of viviparity and multiple reversions to oviparity in squamate reptiles. <i>Ecol Lett</i> 17:13–21. |
| <i>Drysdalia coronoides</i> | Terrestrial   | Ground dweller         | Carnivore   | Viviparous    | Webb GA (1991) A survey of the reptiles and amphibians of Bondi State Forest and surrounding areas, near Bombala, New South Wales. <i>Austr Zool</i> 27:14–19.; Shine R (2002) Allometric patterns in the ecology of Australian snakes. <i>Copeia</i> 1994:851–867.                                                                                                                                                                                                                                                                                                                                      |
| <i>Elaphe dione</i>         | Terrestrial   | Ground dweller         | Carnivore   | Oviparous     | Mori A (2010) Prey-handling behavior of newly hatched snakes in two species of the genus <i>Elaphe</i> with comparison to adult behavior. <i>Ethol</i> 97:198–214.; Pyron RA, Burbrink FT (2013) Early origin of viviparity and multiple reversions to oviparity in squamate reptiles. <i>Ecol Lett</i> 17:13–21.; Aghasyan A., et al (2017) <i>Elaphe dione</i> . The IUCN Red List of Threatened Species 2017: e.T157275A747623. <a href="http://dx.doi.org/10.2305/IUCN.UK.2017-2.RLTS.T157275A747623.en">http://dx.doi.org/10.2305/IUCN.UK.2017-2.RLTS.T157275A747623.en</a> .                       |
| <i>Enhydris enhydris</i>    | Aquatic       | Swimmer                | Carnivore   | Viviparous    | Karns DR, Voris HK, Chanard T, Goodwin JC, Murphy JC (2000) The spatial ecology of the Rainbow Water snake, <i>Enhydris enhydris</i> (Homalopsinae) in southern Thailand. <i>Herpetological Natural History</i> 7: 97–115.; Voris HK, Murphy JC (2002) The prey and predators of homalopsine snakes. <i>J Nat Hist</i> 36:1621–1632.                                                                                                                                                                                                                                                                     |
| <i>Epicrates cenchria</i>   | Semi-arboreal | Ground-dweller/Climber | Carnivore   | Viviparous    | Pyron RA, Burbrink FT (2013) Early origin of viviparity and multiple reversions to oviparity in squamate reptiles. <i>Ecol Lett</i> 17:13–21.; Solis JM, Bowman D, Ward D (2015) <i>Epicrates cenchria</i> (Rainbow Boa): Feeding observation. <i>The Herpetol Bull</i> 132:25–26.; Martin-Solano S, Toulkeridis T, Addison A, Pozo-Rivera WE (2016) Predation of <i>Desmodus rotundus</i> Geoffroy 1810 (Phyllostomatidae,                                                                                                                                                                              |

|                              |                |                        |           |               |                                                                                                                                                                                                                                                                                                                                                                                                                                                                                                                               |
|------------------------------|----------------|------------------------|-----------|---------------|-------------------------------------------------------------------------------------------------------------------------------------------------------------------------------------------------------------------------------------------------------------------------------------------------------------------------------------------------------------------------------------------------------------------------------------------------------------------------------------------------------------------------------|
| <i>Eryx colubrinus</i>       | Fossorial      | Digger                 | Carnivore | Viviparous    | Chiroptera) by <i>Epicrates cenchria</i> (Linnaeus, 1758) (Boidae, Reptilia) in an Ecuadorian Cave. <i>Subterr Biol</i> 19:41–50.<br>Rodríguez-Robles JA, Bell CJ, Greene HW (1999) Gape size and evolution of diet in snakes: Feeding ecology of erycine boas. <i>J Zool</i> 248:49–58.; Lanza B, Nistri A (2005) Somali Boidae (genus <i>Eryx</i> Daudin 1803) and Pythonidae (genus <i>Python</i> Daudin 1803) (Reptilia Serpentes) <i>Trop Zool</i> 18:67–136.                                                            |
| <i>Grayia smythii</i>        | Semi-aquatic   | Ground-dweller/Swimmer | Carnivore | Oviparous     | Luiselli L, Akani GC, Angelici GM, Ude L, Wariboko SM (2005) Seasonal variation in habitat use in sympatric afro-tropical semi-aquatic snakes, <i>Grayia smythii</i> and <i>Afronatrix anoscopus</i> (Colubridae). <i>Amphibia Reptilia</i> 26: 372–376.; Akani GC, Luiselli L (2001) Ecological studies on a population of the water snake <i>Grayia smythii</i> in a rainforest swamp of the Niger Delta, Nigeria. <i>Contributions to Zoology</i> 70(3):139–146.                                                           |
| <i>Heterodon platirhinos</i> | Semi-fossorial | Ground dweller/Digger  | Carnivore | Oviparous     | Edgren RA (1955) The natural history of the Hog-nosed snakes, genus <i>Heterodon</i> : A review. <i>Herpetologica</i> 11:105–117.; Cooper WE, Secor S (2007) Strong response to anuran chemical cues by an extreme dietary specialist, the Eastern Hog-nosed snake ( <i>Heterodon platirhinos</i> ). <i>Can J Zool</i> 85:619–625.                                                                                                                                                                                            |
| <i>Homalopsis buccata</i>    | Semi-aquatic   | Ground dweller/swimmer | Carnivore | Ovoviviparous | Berry PY, Lim GS (1967) The breeding pattern of the Puff-faced Water Snake, <i>Homalopsis buccata</i> Boulenger. <i>Copeia</i> 1967:307–313.; Voris HK, Murphy JC (2002) The prey and predators of homalopsine snakes. <i>J Nat Hist</i> 36:1621–1632.; Karns DR, Murphy JC, Voris HK, Suddeth JS (2005) Comparison of semi-aquatic snake communities associated with the Khorat Basin, Thailand. <i>Nat Hist J Chulalongkorn Univ</i> 5(2):73–90.                                                                            |
| <i>Imantodes cenchoa</i>     | Arboreal       | Climber                | Carnivore | Oviparous     | de Sousa KRM, Prudente ALC, Maschio GF (2014) Reproduction and diet of <i>Imantodes cenchoa</i> (Dipsadidae: Dipsadinae) from the Brazilian Amazon. <i>Zoologia</i> 31(9):8–19.                                                                                                                                                                                                                                                                                                                                               |
| <i>Lachesis stenophrys</i>   | Terrestrial    | Ground dweller         | Carnivore | Oviparous     | Solórzano A (2004) Serpientes de Costa Rica: Distribución, taxonomía, ehistoria natural (Instituto Nacional de Biodiversidad).; Corrales G, Meidinger R, Rodríguez S, Chacón D, Gómez A (2014) Reproduction in captivity of the Central American bushmaster ( <i>Lachesis stenophrys</i> , Serpentes: Viperidae), in Costa Rica. <i>Cuad Herpetol</i> 28(2):137–139.                                                                                                                                                          |
| <i>Lampropeltis getula</i>   | Terrestrial    | Ground dweller         | Carnivore | Oviparous     | Birchard GF, Marcellini D (1996) Incubation time in reptilian eggs. <i>J Zool</i> 240:621–635.; Jackson K, Kley NJ, Brainerd EL (2004) How snakes eat snakes: The biomechanical challenges of ophiophagy for the California kingsnake, <i>Lampropeltis getula californiae</i> (Serpentes: Colubridae). <i>Zoology</i> 107:191–200.; Steen DA, Linehan JM, Smith LL (2010) Multiscale habitat selection and refuge use of Common Kingsnakes, <i>Lampropeltis getula</i> , in Southwestern Georgia. <i>Copeia</i> 2010:227–231. |
| <i>Boaedon fuliginosus</i>   | Terrestrial    | Ground dweller         | Carnivore | Oviparous     | Byars DJ, Ford NB, Sparkman AM, Bronikowski AM (2010) Influences of diet and family on age of maturation in brown house                                                                                                                                                                                                                                                                                                                                                                                                       |

|                                 |                |                       |             |            |                                                                                                                                                                                                                                                                                                                                                                                                                                                                                                                                                                                                                  |
|---------------------------------|----------------|-----------------------|-------------|------------|------------------------------------------------------------------------------------------------------------------------------------------------------------------------------------------------------------------------------------------------------------------------------------------------------------------------------------------------------------------------------------------------------------------------------------------------------------------------------------------------------------------------------------------------------------------------------------------------------------------|
|                                 |                |                       |             |            | snakes, <i>Lamprophis fuliginosus</i> . <i>Herpetologica</i> 66:456–463.; Greenbaum E, Portillo F, Jackson K, Kusamba C (2015) A phylogeny of Central African <i>Boaedon</i> (Serpentes: Lamprophiidae), with the description of a new cryptic species from the Albertine Rift. <i>Afr J Herpetol</i> 64:18–38.                                                                                                                                                                                                                                                                                                  |
| <i>Langaha madagascariensis</i> | Arboreal       | Climber               | Carnivore   | Oviparous  | Krysko KL (2003) Reproduction in the Madagascar Leaf-nosed snake, <i>Langaha madagascariensis</i> (Serpentes: Colubridae: Pseudoxyrhopiinae). <i>Afr J Herpetol</i> 52:61–68.; Krysko KL (2005) Feeding behaviour of the Madagascar Leaf-nosed snake, <i>Langaha madagascariensis</i> (Serpentes: Colubridae: Pseudoxyrhopiinae), with an alternative hypothesis for its bizarre head structure. <i>Afr J Herpetol</i> 54: 195–200.; Tingle JL (2012) Field observations on the behavioral ecology of the Madagascan Leaf-Nosed Snake, <i>Langaha madagascariensis</i> . <i>Herpetol Conserv Biol</i> 7:442–448. |
| <i>Laticauda colubrina</i>      | Aquatic        | Swimmer               | Carnivore   | Oviparous  | Shetty S, Shine R (2008) Sexual divergence in diets and morphology in Fijian sea snakes <i>Laticauda colubrina</i> (Laticaudinae). <i>Austral Ecology</i> 27:77–84.; Pernetta JC (1977) Observations on the habits and morphology of the sea snake <i>Laticauda colubrina</i> (Schneider) in Fiji. <i>Can J Zool</i> 55:1612–1619.                                                                                                                                                                                                                                                                               |
| <i>Rena dulcis</i>              | Fossorial      | Digger                | Invertivore | Oviparous  | Klauber LM (1940) The worm snakes of the genus <i>Leptotyphlops</i> in the United States and northern Mexico. <i>Trans San Diego Soc Nat Hist</i> 9(18):87–162.; Parga VM, Jr (2018) Arthropod diets in Chihuahuan Desert Snakes. PhD Dissertation. The University of Texas at El Paso.                                                                                                                                                                                                                                                                                                                          |
| <i>Lichanura trivirgata</i>     | Terrestrial    | Ground dweller        | Carnivore   | Viviparous | Rodriguez-Robles JA, Bell CJ, Greene HW (1999) Gape size and evolution of diet in snakes: Feeding ecology of ercine boas. <i>J Zool</i> 248:49–58.; Pyron RA, Burbrink FT (2013) Early origin of viviparity and multiple reversions to oviparity in squamate reptiles. <i>Ecol Lett</i> 17:13–21.                                                                                                                                                                                                                                                                                                                |
| <i>Indotyphlops braminus</i>    | Fossorial      | Digger                | Invertivore | Oviparous  | The Brhaminy Blind snake ( <i>Ramphotyphlops braminus</i> ) in the Seychelles Archipelago: Distribution, variation, and further evidence for parthenogenesis. <i>Herpetologica</i> 36:215–221.; Mizuno T, Kojima Y (2015) A blindsnake that decapitates its termite prey. <i>J Zool</i> 297:220–224.                                                                                                                                                                                                                                                                                                             |
| <i>Loxocemus bicolor</i>        | Semi-fossorial | Ground dweller/Digger | Carnivore   | Oviparous  | Mora JM, Robinson DC (1984) Predation of sea turtle eggs ( <i>Lepidochelys</i> ) by the snake <i>Loxocemus bicolor</i> Cope. <i>Rev Biol Trop</i> 32:161–162.; Pyron RA, Burbrink FT (2013) Early origin of viviparity and multiple reversions to oviparity in squamate reptiles. <i>Ecol Lett</i> 17:13–21.; Figgenger C, Beck E, Dunlop D, McCarthy AC (2018) <i>Loxocemus bicolor</i> . Diet. <i>Herpetol Rev</i> 49:133.                                                                                                                                                                                     |
| <i>Lycophidion capense</i>      | Terrestrial    | Ground dweller        | Carnivore   | Oviparous  | Pyron RA, Burbrink FT (2013) Early origin of viviparity and multiple reversions to oviparity in squamate reptiles. <i>Ecol Lett</i> 17:13–21.; Naik H (2017) The evolution of diet in the Lamprophiidae. Ph.D Dissertation. University of Witswatersrand.                                                                                                                                                                                                                                                                                                                                                        |

|                                  |               |                            |             |           |                                                                                                                                                                                                                                                                                                                                                                                                                                                                                                                                                                      |
|----------------------------------|---------------|----------------------------|-------------|-----------|----------------------------------------------------------------------------------------------------------------------------------------------------------------------------------------------------------------------------------------------------------------------------------------------------------------------------------------------------------------------------------------------------------------------------------------------------------------------------------------------------------------------------------------------------------------------|
| <i>Afrotrophlops schlegelii</i>  | Fossorial     | Digger                     | Invertivore | Oviparous | Webb JK, Branch WR, Shine R (2001) Dietary habits and reproductive biology of typhlopids snakes from Southern Africa. <i>J Herpetol</i> 35:558–567.; Maritz B, Alexander GJ (2008) Breaking ground: Quantitative fossorial herpetofaunal ecology in South Africa. <i>Afr J Herpetol</i> 58:1–14.                                                                                                                                                                                                                                                                     |
| <i>Micrurus fulvius</i>          | Terrestrial   | Ground dweller             | Carnivore   | Oviparous | Jackson DR, Franz R (1981) Ecology of the Eastern Coral snake ( <i>Micrurus fulvius</i> ) in northern peninsular Florida. <i>Herpetologica</i> 37:213–228.; Birchard GF, Marcellini D (1996) Incubation time in reptilian eggs. <i>J Zool</i> 240:621–635.                                                                                                                                                                                                                                                                                                           |
| <i>Natrix natrix</i>             | Terrestrial   | Ground dweller             | Carnivore   | Oviparous | Birchard GF, Marcellini D (1996) Incubation time in reptilian eggs. <i>J Zool</i> 240:621–635.; Luiselli L, Capula M (1997) Food habits, growth rates, and reproductive biology of grass snakes, <i>Natrix natrix</i> (Colubridae) in the Italian Alps. <i>J Zool Lond</i> 241:371–380.; Hojati V, Faghiri A, Shiravi A (2012) Diet of the Grass snake, <i>Natrix natrix</i> (Linnaeus, 1758) (Serpentes: Colubridae), in northern Iran. <i>Zool Middle East</i> 55:132–134.                                                                                         |
| <i>Pareas hamptoni</i>           | Arboreal      | Climber                    | Invertivore | Oviparous | Das I (2010) A Field Guide to the Reptiles of South-east Asia (New Holland Publishers).; Pyron RA, Burbrink FT (2013) Early origin of viviparity and multiple reversions to oviparity in squamate reptiles. <i>Ecol Lett</i> 17:13–21.; Vogel G (2015) A new montane species of the genus <i>Pareas</i> Wagler, 1830 (Squamata: Pareasidae) from Northern Myanmar. <i>Taprobanica</i> 7:1–7.                                                                                                                                                                         |
| <i>Philodryas olfersii</i>       | Semi-arboreal | Ground dweller/<br>Climber | Carnivore   | Oviparous | Hartmann PA, Marques OAV (2005) Diet and habitat use of two sympatric species of <i>Philodryas</i> (Colubridae), in south Brazil. <i>Amphib Reptil</i> 26:25–31.; Leite PT, Kaefer IL, Cechin SZ (2009) Diet of <i>Philodryas olfersii</i> (Serpentes, Colubridae) during hydroelectric dam flooding in southern Brazil. <i>North-Western J Zool</i> 5:53–60.                                                                                                                                                                                                        |
| <i>Prosymna meleagris</i>        | Fossorial     | Digger                     | Carnivore   | Oviparous | Broadley DG (1979) Predation on reptile eggs by African snakes of the genus <i>Prosymna</i> . <i>Herpetologica</i> 35:338–341.; Maritz B, Alexander GJ (2008) Breaking ground: Quantitative fossorial herpetofaunal ecology in South Africa. <i>Afr J Herpetol</i> 58:1–14.; Pyron RA, Burbrink FT (2013) Early origin of viviparity and multiple reversions to oviparity in squamate reptiles. <i>Ecol Lett</i> 17:13–21.                                                                                                                                           |
| <i>Psammophis sibilans</i>       | Terrestrial   | Ground dweller             | Carnivore   | Oviparous | Menzies JI (1966) The snakes of Sierra Leone. <i>Copeia</i> 1966:169–179.; Packard GC, Tracy CR, Roth JJ (1977) The physiological ecology of reptilian eggs and embryos and the evolution of viviparity within the class Reptilia. <i>Biol Rev</i> 52:71–105.; Chirio L, LeBreton M (2007) Atlas des reptiles du Cameroun. Publications Scientifiques du Muséum National d'Histoire naturelle, vol. 67 (Naturelle & IRD Editions).; Corlett RT (2011) Vertebrate carnivores and predation in the oriental (Indomalayan) region. <i>Raffles Bull Zool</i> 59:325–360. |
| <i>Pseudoxenodon bambusicola</i> | Terrestrial   | Ground dweller             | Carnivore   | Oviparous | Das I (2010) A Field Guide to the Reptiles of South-east Asia (New Holland Publishers).; Corlett RT (2011) Vertebrate carnivores and                                                                                                                                                                                                                                                                                                                                                                                                                                 |



|                                |               |                        |             |            |                                                                                                                                                                                                                                                                                                                                                                                                                                                                            |
|--------------------------------|---------------|------------------------|-------------|------------|----------------------------------------------------------------------------------------------------------------------------------------------------------------------------------------------------------------------------------------------------------------------------------------------------------------------------------------------------------------------------------------------------------------------------------------------------------------------------|
|                                |               |                        |             |            | predation in the oriental (Indomalayan) region. <i>Raffles Bull Zool</i> 59:325–360.; Liu Y, Ding L, Lei J, Zhao E, Tang Y (2012) Eye size variation reflects habitat and daily activity patterns in colubrid snakes. <i>J Morphol</i> 273:883–893.; Pyron RA, Burbrink FT (2013) Early origin of viviparity and multiple reversions to oviparity in squamate reptiles. <i>Ecol Lett</i> 17:13–21.                                                                         |
| <i>Python molurus</i>          | Terrestrial   | Ground dweller         | Carnivore   | Oviparous  | Birchard GF, Marcellini D (1996) Incubation time in reptilian eggs. <i>J Zool</i> 240:621–635.; Rochford M, et al. (2010) <i>Python molurus bivittatus</i> (Burmese Python). Diet. <i>Herpetol Rev</i> 41:97.; Corlett RT (2011) Vertebrate carnivores and predation in the oriental (Indomalayan) region. <i>Raffles Bull Zool</i> 59:325–360.                                                                                                                            |
| <i>Regina grahami</i>          | Aquatic       | Swimmer                | Invertivore | Viviparous | Kofron CP (1978) Foods and habitats of aquatic snakes (Reptilia, Serpentes) in a Louisiana swamp. <i>J Herpetol</i> 12:543–554.; Pyron RA, Burbrink FT (2013) Early origin of viviparity and multiple reversions to oviparity in squamate reptiles. <i>Ecol Lett</i> 17:13–21.                                                                                                                                                                                             |
| <i>Sibynophis collaris</i>     | Terrestrial   | Ground dweller         | Carnivore   | Oviparous  | Das I (2010) A Field Guide to the Reptiles of South-east Asia (New Holland Publishers); Corlett RT (2011) Vertebrate carnivores and predation in the oriental (Indomalayan) region. <i>Raffles Bull Zool</i> 59:325–360.; Pyron RA, Burbrink FT (2013) Early origin of viviparity and multiple reversions to oviparity in squamate reptiles. <i>Ecol Lett</i> 17:13–21.                                                                                                    |
| <i>Sonora semiannulata</i>     | Terrestrial   | Ground dweller         | Invertivore | Oviparous  | Goldberg SR (2001) Reproduction in the Ground snake, <i>Sonora semiannulata</i> (Serpentes: Colubridae), from Arizona. <i>Southwest Nat</i> 46:387–391.; Parga VM (2018) Arthropod diets in Chihuahuan Desert snakes. PhD Dissertation. University of Texas at El Paso.                                                                                                                                                                                                    |
| <i>Thamnophis marcianus</i>    | Semi-aquatic  | Ground dweller/swimmer | Carnivore   | Viviparous | Seigel RA, Ford NB, Mahrt LA (2000) Ecology of an aquatic snake ( <i>Thamnophis marcianus</i> ) in a desert environment: Implications of early timing of birth and geographic variation in reproduction. <i>Am Midl Nat</i> 143:453–462.                                                                                                                                                                                                                                   |
| <i>Trachyboa boulengeri</i>    | Semi-aquatic  | Ground dweller/swimmer | Carnivore   | Viviparous | Pyron RA, Burbrink FT (2013) Early origin of viviparity and multiple reversions to oviparity in squamate reptiles. <i>Ecol Lett</i> 17:13–21.; Dwyer Q, Arteaga A, Barrio-Amoros C, Flage A (2018) <i>Trachyboa boulengeri</i> . Diet. <i>Herpetol Rev</i> 49:359–360.                                                                                                                                                                                                     |
| <i>Trimeresurus gramineus</i>  | Arboreal      | Climber                | Carnivore   | Viviparous | Cr er S, Malhotra A, Thorpe RS, Stocklin R, Favreau P, Hao Chou W (2003) Genetic and ecological correlates of intraspecific variation in pitviper venom composition detected using matrix-assisted laser desorption time-of-flight mass spectrometry (MALDI-TOF-MS) and isoelectric focusing. <i>J Mol Evol</i> 56:317–329.; Pyron RA, Burbrink FT (2013) Early origin of viviparity and multiple reversions to oviparity in squamate reptiles. <i>Ecol Lett</i> 17:13–21. |
| <i>Trimorphodon biscutatus</i> | Semi-arboreal | Ground dweller/Climber | Carnivore   | Oviparous  | Pyron RA, Burbrink FT (2013) Early origin of viviparity and multiple reversions to oviparity in squamate reptiles. <i>Ecol Lett</i> 17:13–21.; Lara Resendiz RA, diaz de la Vega-Perez A (2016) Natural history notes: <i>Trimorphodon biscutatus</i> . Diet, prey size, and                                                                                                                                                                                               |

|                                    |                |                        |           |            |                                                                                                                                                                                                                                                                                                                                                                                                                                                                                                                                                                                                                     |
|------------------------------------|----------------|------------------------|-----------|------------|---------------------------------------------------------------------------------------------------------------------------------------------------------------------------------------------------------------------------------------------------------------------------------------------------------------------------------------------------------------------------------------------------------------------------------------------------------------------------------------------------------------------------------------------------------------------------------------------------------------------|
|                                    |                |                        |           |            | accidental mortality ( <i>Ctenosaura pectinata</i> ). <i>Mesoam Herpetol</i> 3:750–751.                                                                                                                                                                                                                                                                                                                                                                                                                                                                                                                             |
| <i>Tropidophis haetianus</i>       | Terrestrial    | Ground dweller         | Carnivore | Viviparous | Hedges SB (2002) Morphological variation and the definition of species in the snake genus <i>Tropidophis</i> (Serpentes, Tropidophiidae). <i>Bull Nat Hist Mus Lond (Zool)</i> 68(2):83–90.                                                                                                                                                                                                                                                                                                                                                                                                                         |
| <i>Ungaliophis continentalis</i>   | Terrestrial    | Ground dweller         | Carnivore | Viviparous | McCranie JR, Castañeda FE (2005) The herpetofauna of Parque Nacional Pico Bonito, Honduras. <i>Phyllomedusa</i> 4:1–16.; Pyron RA, Burbrink FT (2013) Early origin of viviparity and multiple reversions to oviparity in squamate reptiles. <i>Ecol Lett</i> 17:13–21.                                                                                                                                                                                                                                                                                                                                              |
| <i>Uromacer oxyrhynchus</i>        | Arboreal       | Climber                | Carnivore | Oviparous  | Henderson RW, Noeske-Hallin TA, Crother BI, Schwartz A (1988) The diets of Hispaniolan colubrid snakes. II. Prey species, prey size, and phylogeny. <i>Herpetologica</i> 44:55–70.; Pyron RA, Burbrink FT (2013) Early origin of viviparity and multiple reversions to oviparity in squamate reptiles. <i>Ecol Lett</i> 17:13–21.                                                                                                                                                                                                                                                                                   |
| <i>Xenochrophis flavipunctatus</i> | Semi-aquatic   | Ground dweller/swimmer | Carnivore | Oviparous  | Pyron RA, Burbrink FT (2013) Early origin of viviparity and multiple reversions to oviparity in squamate reptiles. <i>Ecol Lett</i> 17:13–21.; Poo S, Low M-R, Devan-Song A (2016) <i>Xenochrophis flavipunctatus</i> (Yellow-spotted Keelback Watersnake). Diet. <i>Herpetol Rev</i> 47:319.                                                                                                                                                                                                                                                                                                                       |
| <i>Xenodermus javanicus</i>        | Semi-fossorial | Ground dweller/Digger  | Carnivore | Oviparous  | Corlett RT (2011) Vertebrate carnivores and predation in the Oriental (Indomalayan) region. <i>Raffles Bull Zool</i> 59:325–360.; Rovatsos M, Pokorná MJ, Kratochvíl L (2015) Differentiation of sex chromosomes and karyotype characterisation in the Dragonsnake <i>Xenodermus javanicus</i> (Squamata: Xenodermatidae). <i>Cytogenet Genome Res</i> 147:48–54.; Das I (2010) A Field Guide to the Reptiles of South-east Asia (New Holland Publishers).; Pyron RA, Burbrink FT (2013) Early origin of viviparity and multiple reversions to oviparity in squamate reptiles. <i>Ecol Lett</i> 17:13–21.           |
| <i>Xenopeltis unicolor</i>         | Semi-fossorial | Ground dweller/Digger  | Carnivore | Oviparous  | Teynié A (2004) Notes on Reptiles of Nam Lan Conservation Area in Phongsaly Province of Lao PDR (Société d’Histoire Naturelle).; Pyron RA, Burbrink FT (2013) Early origin of viviparity and multiple reversions to oviparity in squamate reptiles. <i>Ecol Lett</i> 17:13–21.; Milto KD (2014) <i>Xenopeltis unicolor</i> (Asian Sunbeam Snake). Diet. <i>Herpetol Rev</i> 45: 522.                                                                                                                                                                                                                                |
| <i>Xenophidion schaeferi</i>       | Semi-fossorial | Ground dweller/Digger  | Unknown   | Oviparous  | Quah ESH, Grismer LL, Jetten T, Wood PL, Jr., Miralles A, Sah SAM, Guek KHP, Brady ML (2018) The rediscovery of Schaefer’s Spin-jawed Snake ( <i>Xenophidion schaeferi</i> Günther & Manthey, 1995) (Serpentes, Xenophidiidae) from Peninsular Malaysia with notes on its variation and the first record of the genus from Sumatra, Indonesia. <i>Zootaxa</i> 4441:366–378.; Das I (2010) A Field Guide to the Reptiles of South-east Asia (New Holland Publishers).; Pyron RA, Burbrink FT (2013) Early origin of viviparity and multiple reversions to oviparity in squamate reptiles. <i>Ecol Lett</i> 17:13–21. |

**Table S6. R<sup>2</sup> from phylogenetically corrected MANOVA for each partition and trait (\**P* < 0.05; \*\**P* < 0.01; \*\*\**P* < 0.001).**

Lizard Dataset

| Partition         | Diet   | Habitat  | Locomotion | Reproductive mode |
|-------------------|--------|----------|------------|-------------------|
| Premaxilla        | 0.071* | 0.188*** | 0.159**    | 0.008             |
| Nasal             | 0.068* | 0.191*** | 0.200***   | 0.004             |
| Maxilla           | 0.043  | 0.169*** | 0.142***   | 0.010             |
| Jugal             | 0.030  | 0.190*** | 0.166***   | 0.021             |
| Frontal           | 0.036  | 0.228*** | 0.205***   | 0.007             |
| Parietal          | 0.016  | 0.139*   | 0.117*     | 0.004             |
| Squamosal         | 0.035  | 0.119*   | 0.118*     | 0.022             |
| Jaw joint         | 0.075* | 0.169**  | 0.123*     | 0.004             |
| Supra-otoccipital | 0.031  | 0.173*** | 0.167***   | 0.020*            |
| Basioccipital     | 0.040  | 0.202*** | 0.181***   | 0.021*            |
| Pterygoid         | 0.037  | 0.166*** | 0.147***   | 0.009             |
| Palatine          | 0.042  | 0.204*** | 0.200***   | 0.007             |
| Occipital condyle | 0.032  | 0.219*** | 0.216***   | 0.038*            |
| Whole skull       | 0.039  | 0.176*** | 0.158**    | 0.012             |

Snake Dataset

| Partition         | Diet    | Habitat  | Locomotion | Reproductive mode |
|-------------------|---------|----------|------------|-------------------|
| Premaxilla        | 0.011   | 0.161    | 0.162      | 0.013             |
| Nasal             | 0.018   | 0.178*   | 0.178*     | 0.032             |
| Maxilla           | 0.014   | 0.148    | 0.148      | 0.020             |
| Frontal           | 0.023   | 0.159    | 0.159      | 0.019             |
| Parietal          | 0.032   | 0.245*** | 0.245***   | 0.020             |
| Supratemporal     | 0.049*  | 0.225**  | 0.225**    | 0.017             |
| Jaw joint         | 0.053*  | 0.173    | 0.173      | 0.028             |
| Supra-otoccipital | 0.062** | 0.224**  | 0.224**    | 0.010             |
| Basioccipital     | 0.034** | 0.141    | 0.141      | 0.010             |
| Pterygoid         | 0.084** | 0.221**  | 0.221**    | 0.020             |
| Palatine          | 0.020   | 0.189*   | 0.189*     | 0.011             |
| Occipital condyle | 0.087** | 0.172    | 0.172      | 0.019             |
| Whole skull       | 0.038*  | 0.181*** | 0.181***   | 0.021             |

**Table S7. Between-partition covariance ratios (upper triangle), between-partition correlations (bottom triangle), and within-partition correlations (diagonal) across partitions after correcting for phylogenetic structure.** Values calculated using phylogenetically-informed `modularity.test` in the `geomorph` R package (12, 13) and `EMMLi` (32), respectively.

Lizard Dataset

|                   | Premaxilla | Nasal | Maxilla | Jugal | Frontal | Parietal | Squamosal | Jaw Joint | Supra-otoccipital | Basioccipital | Pterygoid | Palatine | Occipital condyle |
|-------------------|------------|-------|---------|-------|---------|----------|-----------|-----------|-------------------|---------------|-----------|----------|-------------------|
| Premaxilla        | 0.84       | 0.625 | 0.744   | 0.503 | 0.533   | 0.464    | 0.635     | 0.594     | 0.475             | 0.549         | 0.507     | 0.464    | 0.338             |
| Nasal             | 0.31       | 0.68  | 0.701   | 0.594 | 0.596   | 0.477    | 0.462     | 0.480     | 0.514             | 0.468         | 0.520     | 0.627    | 0.416             |
| Maxilla           | 0.35       | 0.21  | 0.54    | 0.789 | 0.738   | 0.645    | 0.699     | 0.631     | 0.695             | 0.685         | 0.649     | 0.658    | 0.652             |
| Jugal             | 0.10       | 0.16  | 0.31    | 0.81  | 0.661   | 0.617    | 0.693     | 0.639     | 0.727             | 0.548         | 0.617     | 0.649    | 0.711             |
| Frontal           | 0.26       | 0.29  | 0.16    | 0.12  | 0.76    | 0.798    | 0.583     | 0.500     | 0.782             | 0.713         | 0.594     | 0.580    | 0.783             |
| Parietal          | 0.16       | 0.06  | 0.08    | 0.14  | 0.35    | 0.62     | 0.561     | 0.519     | 0.755             | 0.671         | 0.596     | 0.506    | 0.708             |
| Squamosal         | 0.05       | 0.09  | 0.11    | 0.16  | 0.05    | 0.08     | 0.82      | 0.561     | 0.662             | 0.645         | 0.501     | 0.485    | 0.522             |
| Jaw Joint         | 0.12       | 0.09  | 0.17    | 0.29  | 0.13    | 0.19     | 0.36      | 0.98      | 0.610             | 0.509         | 0.651     | 0.540    | 0.497             |
| Supra-otoccipital | 0.07       | 0.09  | 0.08    | 0.16  | 0.16    | 0.18     | 0.15      | 0.18      | 0.54              | 0.785         | 0.590     | 0.604    | 0.860             |
| Basioccipital     | 0.11       | 0.08  | 0.11    | 0.12  | 0.20    | 0.16     | 0.07      | 0.18      | 0.31              | 0.59          | 0.647     | 0.618    | 0.768             |
| Pterygoid         | 0.08       | 0.12  | 0.15    | 0.11  | 0.09    | 0.19     | 0.13      | 0.42      | 0.13              | 0.15          | 0.64      | 0.819    | 0.584             |
| Palatine          | 0.16       | 0.15  | 0.21    | 0.15  | 0.05    | 0.11     | 0.05      | 0.16      | 0.06              | 0.11          | 0.41      | 0.65     | 0.650             |
| Occipital condyle | 0.08       | 0.05  | 0.10    | 0.27  | 0.38    | 0.31     | 0.09      | 0.07      | 0.45              | 0.49          | 0.09      | 0.07     | 0.95              |

Snake Dataset

|                   | Premaxilla | Nasal | Maxilla | Frontal | Parietal | Supratemporal | Jaw Joint | Supra-otoccipital | Basioccipital | Pterygoid | Palatine | Occipital condyle |
|-------------------|------------|-------|---------|---------|----------|---------------|-----------|-------------------|---------------|-----------|----------|-------------------|
| Premaxilla        | 0.85       | 0.647 | 0.509   | 0.384   | 0.513    | 0.462         | 0.502     | 0.530             | 0.389         | 0.483     | 0.462    | 0.400             |
| Nasal             | 0.34       | 0.74  | 0.596   | 0.608   | 0.569    | 0.520         | 0.528     | 0.506             | 0.453         | 0.547     | 0.574    | 0.478             |
| Maxilla           | 0.26       | 0.34  | 0.74    | 0.632   | 0.637    | 0.564         | 0.387     | 0.611             | 0.580         | 0.529     | 0.539    | 0.544             |
| Frontal           | 0.14       | 0.31  | 0.21    | 0.82    | 0.599    | 0.442         | 0.245     | 0.404             | 0.470         | 0.427     | 0.570    | 0.397             |
| Parietal          | 0.14       | 0.15  | 0.19    | 0.39    | 0.62     | 0.623         | 0.679     | 0.800             | 0.571         | 0.696     | 0.539    | 0.662             |
| Supratemporal     | 0.12       | 0.13  | 0.16    | 0.04    | 0.19     | 0.78          | 0.682     | 0.671             | 0.560         | 0.664     | 0.467    | 0.581             |
| Jaw Joint         | 0.05       | 0.15  | 0.22    | 0.10    | 0.36     | 0.27          | 0.99      | 0.832             | 0.575         | 0.818     | 0.416    | 0.783             |
| Supra-otoccipital | 0.18       | 0.10  | 0.20    | 0.13    | 0.35     | 0.36          | 0.59      | 0.73              | 0.620         | 0.789     | 0.505    | 0.886             |
| Basioccipital     | 0.14       | 0.12  | 0.20    | 0.13    | 0.18     | 0.30          | 0.41      | 0.44              | 0.61          | 0.723     | 0.586    | 0.616             |
| Pterygoid         | 0.15       | 0.20  | 0.30    | 0.13    | 0.27     | 0.24          | 0.60      | 0.37              | 0.40          | 0.81      | 0.705    | 0.769             |
| Palatine          | 0.18       | 0.26  | 0.30    | 0.15    | 0.13     | 0.12          | 0.15      | 0.12              | 0.20          | 0.49      | 0.70     | 0.482             |
| Occipital condyle | 0.18       | 0.08  | 0.19    | 0.26    | 0.23     | 0.24          | 0.67      | 0.69              | 0.51          | 0.45      | 0.18     | 0.97              |

### Extant Dataset

|                   | Premaxilla | Nasal | Maxilla | Frontal | Parietal | Supratemporal | Jaw Joint | Supra-otoccipital | Basioccipital | Pterygoid | Palatine | Occipital condyle |
|-------------------|------------|-------|---------|---------|----------|---------------|-----------|-------------------|---------------|-----------|----------|-------------------|
| Premaxilla        | 0.82       | 0.682 | 0.597   | 0.578   | 0.599    | 0.653         | 0.642     | 0.533             | 0.561         | 0.679     | 0.443    | 0.253             |
| Nasal             | 0.26       | 0.69  | 0.721   | 0.562   | 0.562    | 0.570         | 0.692     | 0.531             | 0.672         | 0.712     | 0.551    | 0.323             |
| Maxilla           | 0.20       | 0.22  | 0.67    | 0.643   | 0.596    | 0.536         | 0.692     | 0.590             | 0.818         | 0.741     | 0.488    | 0.469             |
| Frontal           | 0.27       | 0.27  | 0.15    | 0.77    | 0.882    | 0.694         | 0.602     | 0.599             | 0.716         | 0.689     | 0.431    | 0.526             |
| Parietal          | 0.13       | 0.06  | 0.08    | 0.35    | 0.60     | 0.730         | 0.696     | 0.634             | 0.703         | 0.754     | 0.425    | 0.485             |
| Supratemporal     | 0.08       | 0.10  | 0.07    | 0.05    | 0.09     | 0.78          | 0.661     | 0.671             | 0.650         | 0.734     | 0.477    | 0.353             |
| Jaw Joint         | 0.11       | 0.03  | 0.22    | 0.06    | 0.18     | 0.14          | 0.99      | 0.646             | 0.842         | 0.930     | 0.522    | 0.397             |
| Supra-otoccipital | 0.16       | 0.10  | 0.10    | 0.14    | 0.16     | 0.18          | 0.28      | 0.57              | 0.581         | 0.612     | 0.531    | 0.793             |
| Basioccipital     | 0.12       | 0.07  | 0.10    | 0.17    | 0.10     | 0.11          | 0.15      | 0.29              | 0.55          | 0.870     | 0.466    | 0.399             |
| Pterygoid         | 0.13       | 0.14  | 0.23    | 0.06    | 0.15     | 0.10          | 0.51      | 0.14              | 0.15          | 0.71      | 0.573    | 0.349             |
| Palatine          | 0.10       | 0.18  | 0.28    | 0.06    | 0.09     | 0.05          | 0.19      | 0.08              | 0.12          | 0.47      | 0.72     | 0.449             |
| Occipital condyle | 0.21       | 0.08  | 0.11    | 0.36    | 0.21     | 0.10          | 0.38      | 0.49              | 0.43          | 0.19      | 0.12     | 0.94              |

### Combined Dataset

|                   | Premaxilla | Maxilla | Frontal | Parietal | Supra-otoccipital |
|-------------------|------------|---------|---------|----------|-------------------|
| Premaxilla        | 0.80       | 0.713   | 0.498   | 0.539    | 0.543             |
| Maxilla           | 0.23       | 0.64    | 0.701   | 0.646    | 0.509             |
| Frontal           | 0.23       | 0.17    | 0.77    | 0.867    | 0.748             |
| Parietal          | 0.13       | 0.07    | 0.29    | 0.50     | 0.782             |
| Supra-otoccipital | 0.21       | 0.07    | 0.26    | 0.21     | 0.60              |

### Combined Dataset (Alternative Topology)

|                   | Premaxilla | Maxilla | Frontal | Parietal | Supra-otoccipital |
|-------------------|------------|---------|---------|----------|-------------------|
| Premaxilla        | 0.80       | 0.712   | 0.493   | 0.535    | 0.541             |
| Maxilla           | 0.23       | 0.64    | 0.702   | 0.648    | 0.510             |
| Frontal           | 0.23       | 0.17    | 0.77    | 0.867    | 0.748             |
| Parietal          | 0.13       | 0.07    | 0.29    | 0.50     | 0.781             |
| Supra-otoccipital | 0.21       | 0.07    | 0.27    | 0.22     | 0.61              |

**Table S8. Between-partition covariance ratios (upper triangle), between-partition correlations (bottom triangle), and within-partition correlations (diagonal) across partitions based on phylogenetically naïve analyses.** Values calculated using `modularity.test` in the `geomorph` (12, 13) R package and `EMMLi` (32), respectively.

Lizard Dataset

|                   | Premaxilla | Nasal | Maxilla | Jugal | Frontal | Parietal | Squamosal | Jaw Joint | Supra-otoccipital | Basioccipital | Pterygoid | Palatine | Occipital condyle |
|-------------------|------------|-------|---------|-------|---------|----------|-----------|-----------|-------------------|---------------|-----------|----------|-------------------|
| Premaxilla        | 0.81       | 0.600 | 0.690   | 0.400 | 0.505   | 0.447    | 0.574     | 0.488     | 0.442             | 0.509         | 0.454     | 0.404    | 0.332             |
| Nasal             | 0.31       | 0.77  | 0.678   | 0.571 | 0.583   | 0.476    | 0.650     | 0.496     | 0.488             | 0.478         | 0.530     | 0.622    | 0.432             |
| Maxilla           | 0.31       | 0.21  | 0.54    | 0.816 | 0.766   | 0.696    | 0.701     | 0.658     | 0.730             | 0.740         | 0.678     | 0.693    | 0.717             |
| Jugal             | 0.13       | 0.18  | 0.27    | 0.79  | 0.728   | 0.685    | 0.706     | 0.719     | 0.798             | 0.686         | 0.663     | 0.685    | 0.788             |
| Frontal           | 0.20       | 0.39  | 0.23    | 0.17  | 0.80    | 0.838    | 0.619     | 0.598     | 0.845             | 0.814         | 0.642     | 0.657    | 0.854             |
| Parietal          | 0.15       | 0.11  | 0.16    | 0.15  | 0.41    | 0.62     | 0.591     | 0.584     | 0.779             | 0.737         | 0.647     | 0.581    | 0.751             |
| Squamosal         | 0.07       | 0.10  | 0.09    | 0.23  | 0.10    | 0.12     | 0.85      | 0.610     | 0.662             | 0.671         | 0.558     | 0.548    | 0.596             |
| Jaw Joint         | 0.10       | 0.12  | 0.17    | 0.42  | 0.07    | 0.20     | 0.35      | 0.98      | 0.754             | 0.657         | 0.675     | 0.597    | 0.689             |
| Supra-otoccipital | 0.08       | 0.13  | 0.15    | 0.29  | 0.29    | 0.26     | 0.19      | 0.33      | 0.62              | 0.887         | 0.654     | 0.669    | 0.942             |
| Basioccipital     | 0.12       | 0.12  | 0.13    | 0.21  | 0.25    | 0.20     | 0.08      | 0.22      | 0.36              | 0.59          | 0.697     | 0.705    | 0.905             |
| Pterygoid         | 0.12       | 0.23  | 0.21    | 0.15  | 0.24    | 0.23     | 0.16      | 0.26      | 0.21              | 0.19          | 0.69      | 0.836    | 0.647             |
| Palatine          | 0.16       | 0.31  | 0.23    | 0.18  | 0.21    | 0.17     | 0.15      | 0.16      | 0.18              | 0.17          | 0.53      | 0.73     | 0.705             |
| Occipital condyle | 0.13       | 0.26  | 0.16    | 0.29  | 0.59    | 0.41     | 0.17      | 0.36      | 0.57              | 0.52          | 0.30      | 0.32     | 0.97              |

Snake Dataset

|                   | Premaxilla | Nasal | Maxilla | Frontal | Parietal | Supratemporal | Jaw Joint | Supra-otoccipital | Basioccipital | Pterygoid | Palatine | Occipital condyle |
|-------------------|------------|-------|---------|---------|----------|---------------|-----------|-------------------|---------------|-----------|----------|-------------------|
| Premaxilla        | 0.85       | 0.632 | 0.520   | 0.373   | 0.534    | 0.500         | 0.508     | 0.547             | 0.431         | 0.509     | 0.458    | 0.437             |
| Nasal             | 0.34       | 0.74  | 0.591   | 0.624   | 0.577    | 0.544         | 0.572     | 0.509             | 0.446         | 0.550     | 0.557    | 0.473             |
| Maxilla           | 0.26       | 0.34  | 0.74    | 0.600   | 0.625    | 0.555         | 0.375     | 0.572             | 0.571         | 0.506     | 0.545    | 0.489             |
| Frontal           | 0.14       | 0.31  | 0.21    | 0.82    | 0.567    | 0.440         | 0.309     | 0.398             | 0.439         | 0.344     | 0.540    | 0.380             |
| Parietal          | 0.14       | 0.15  | 0.19    | 0.39    | 0.62     | 0.656         | 0.665     | 0.754             | 0.588         | 0.693     | 0.525    | 0.596             |
| Supratemporal     | 0.12       | 0.13  | 0.16    | 0.04    | 0.19     | 0.78          | 0.710     | 0.711             | 0.595         | 0.692     | 0.471    | 0.633             |
| Jaw Joint         | 0.05       | 0.15  | 0.22    | 0.10    | 0.36     | 0.27          | 0.99      | 0.883             | 0.675         | 0.852     | 0.432    | 0.851             |
| Supra-otoccipital | 0.18       | 0.10  | 0.20    | 0.13    | 0.35     | 0.36          | 0.59      | 0.73              | 0.714         | 0.827     | 0.517    | 0.931             |
| Basioccipital     | 0.14       | 0.12  | 0.20    | 0.13    | 0.18     | 0.30          | 0.41      | 0.44              | 0.61          | 0.774     | 0.602    | 0.712             |
| Pterygoid         | 0.15       | 0.20  | 0.30    | 0.13    | 0.27     | 0.24          | 0.60      | 0.37              | 0.40          | 0.81      | 0.689    | 0.799             |
| Palatine          | 0.18       | 0.26  | 0.30    | 0.15    | 0.13     | 0.12          | 0.15      | 0.12              | 0.20          | 0.49      | 0.70     | 0.497             |
| Occipital condyle | 0.18       | 0.08  | 0.19    | 0.26    | 0.23     | 0.24          | 0.67      | 0.69              | 0.51          | 0.45      | 0.18     | 0.97              |

Extant Dataset

|                   | Premaxilla | Nasal | Maxilla | Frontal | Parietal | Squamosal/<br>Supratemporal | Jaw Joint | Supra-<br>otoccipital | Basioccipital | Pterygoid | Palatine | Occipital<br>condyle |
|-------------------|------------|-------|---------|---------|----------|-----------------------------|-----------|-----------------------|---------------|-----------|----------|----------------------|
| Premaxilla        | 0.81       | 0.664 | 0.590   | 0.578   | 0.596    | 0.643                       | 0.589     | 0.511                 | 0.561         | 0.652     | 0.432    | 0.324                |
| Nasal             | 0.32       | 0.78  | 0.718   | 0.544   | 0.545    | 0.568                       | 0.687     | 0.489                 | 0.669         | 0.708     | 0.559    | 0.342                |
| Maxilla           | 0.24       | 0.29  | 0.70    | 0.632   | 0.596    | 0.532                       | 0.670     | 0.562                 | 0.819         | 0.732     | 0.506    | 0.469                |
| Frontal           | 0.21       | 0.26  | 0.21    | 0.75    | 0.879    | 0.666                       | 0.483     | 0.637                 | 0.695         | 0.601     | 0.470    | 0.612                |
| Parietal          | 0.19       | 0.10  | 0.23    | 0.43    | 0.68     | 0.717                       | 0.620     | 0.611                 | 0.699         | 0.710     | 0.444    | 0.506                |
| Supratemporal     | 0.07       | 0.07  | 0.13    | 0.09    | 0.11     | 0.85                        | 0.633     | 0.612                 | 0.648         | 0.714     | 0.496    | 0.386                |
| Jaw Joint         | 0.11       | 0.09  | 0.36    | 0.25    | 0.38     | 0.22                        | 0.99      | 0.640                 | 0.808         | 0.926     | 0.544    | 0.477                |
| Supra-otoccipital | 0.12       | 0.13  | 0.15    | 0.18    | 0.18     | 0.16                        | 0.28      | 0.57                  | 0.563         | 0.569     | 0.550    | 0.906                |
| Basioccipital     | 0.14       | 0.18  | 0.25    | 0.21    | 0.19     | 0.12                        | 0.52      | 0.31                  | 0.67          | 0.857     | 0.493    | 0.442                |
| Pterygoid         | 0.15       | 0.23  | 0.31    | 0.22    | 0.27     | 0.21                        | 0.62      | 0.14                  | 0.34          | 0.72      | 0.585    | 0.375                |
| Palatine          | 0.09       | 0.20  | 0.17    | 0.12    | 0.08     | 0.19                        | 0.17      | 0.10                  | 0.14          | 0.39      | 0.71     | 0.506                |
| Occipital condyle | 0.15       | 0.18  | 0.09    | 0.41    | 0.23     | 0.14                        | 0.33      | 0.52                  | 0.40          | 0.13      | 0.16     | 0.96                 |

Combined Dataset

|                   | Premaxilla | Maxilla | Frontal | Parietal | Supra-otoccipital |
|-------------------|------------|---------|---------|----------|-------------------|
| Premaxilla        | 0.80       | 0.703   | 0.533   | 0.558    | 0.578             |
| Maxilla           | 0.28       | 0.69    | 0.686   | 0.644    | 0.530             |
| Frontal           | 0.15       | 0.22    | 0.75    | 0.877    | 0.788             |
| Parietal          | 0.13       | 0.20    | 0.37    | 0.59     | 0.800             |
| Supra-otoccipital | 0.18       | 0.15    | 0.32    | 0.31     | 0.61              |

**Table S9. Regression coefficients ( $R^2$ ) from least-squares regression analysis of within-partition correlation ( $\rho$ ), disparity, and mean evolutionary rates under Brownian motion model (\* $P < 0.05$ ; \*\* $P < 0.01$ ; \*\*\* $P < 0.001$ ).  $\rho$  values are from phylogenetically informed EMLi analyses. Rate has been corrected by number of landmarks within partitions.**

| Dataset              | $\rho \propto$ disparity | $\rho \propto$ rate | disparity $\propto$ rate | $\rho \propto$ corr. disparity | corr. disparity $\propto$ rate |
|----------------------|--------------------------|---------------------|--------------------------|--------------------------------|--------------------------------|
| Combined ( $N = 5$ ) | 0.114                    | 0.387               | 0.700                    | 0.309                          | 0.984***                       |
| Extant ( $N = 12$ )  | 0.002                    | 0.243               | 0.481*                   | 0.232                          | 0.969***                       |
| Lizard ( $N = 13$ )  | 0.086                    | 0.127               | 0.286                    | 0.205                          | 0.857***                       |
| Snake ( $N = 12$ )   | 0.013                    | 0.259               | 0.400*                   | 0.258                          | 0.995***                       |



**Table S10. Results from performing LaSEC with 100 iterations on individual cranial partitions of the extant squamate dataset.** Values for Fit = 0.9, 0.95, and 0.99 denote the median number of randomly subsampled landmarks at these fit values. Fixed-only column indicates the degree of fit (0 to 1) between datasets with only fixed landmarks to the respective full high-dimensional coordinate data.

| Dataset            | Number of Landmarks | Fit = 0.90 | Fit = 0.95 | Fit = 0.99 | Fixed-only |
|--------------------|---------------------|------------|------------|------------|------------|
| Premaxilla         | 78                  | 15         | 23         | 49         | 0.713      |
| Nasal              | 86                  | 15         | 25         | 54         | 0.664      |
| Maxilla            | 162                 | 16         | 27         | 74         | 0.696      |
| Jugal              | 94                  | 13         | 20         | 51         | 0.645      |
| Frontal            | 130                 | 14         | 25         | 66         | 0.721      |
| Parietal           | 98                  | 16         | 28         | 64         | 0.647      |
| Squamosal          | 52                  | 17         | 25         | 43         | 0.452      |
| Jaw joint          | 42                  | 20         | 27         | 38         | 0.484      |
| Supra- otoccipital | 132                 | 30         | 55         | 90         | 0.597      |
| Occipital condyle  | 37                  | 22         | 27         | 34         | —          |
| Basioccipital      | 122                 | 14         | 26         | 66         | 0.805      |
| Pterygoid          | 53                  | 14         | 21         | 39         | 0.421      |
| Palatine           | 64                  | 16         | 23         | 45         | 0.457      |

**Table S11. The effect of phylogenetic signal ( $K_{mult}$ ), allometry, and evolutionary allometry on skull and partition shapes (\* $P < 0.05$ ; \*\* $P < 0.01$ ; \*\*\* $P < 0.001$ ). Partition shape of combined datasets were used for premaxilla, maxilla, frontal, parietal, and supra-otoccipital.**

| Dataset                 | $K_{mult}$ | $R^2_{allometry}$ | $R^2_{evolutionary\ allometry}$ |
|-------------------------|------------|-------------------|---------------------------------|
| Combined                | 0.723***   | 0.094***          | 0.055***                        |
| Extant                  | 0.889***   | 0.079***          | 0.071***                        |
| Lizard                  | 0.699***   | 0.183***          | 0.058**                         |
| Snake                   | 1.050***   | 0.107***          | 0.117***                        |
| Premaxilla              | 0.634***   | 0.081***          | 0.066***                        |
| Nasal                   | 0.701***   | 0.035***          | 0.010                           |
| Maxilla                 | 0.817***   | 0.043***          | 0.032**                         |
| Jugal                   | 0.953***   | 0.191***          | 0.067***                        |
| Frontal                 | 0.714***   | 0.144***          | 0.072***                        |
| Parietal                | 0.721***   | 0.093***          | 0.041***                        |
| Squamosal/Supratemporal | 0.803***   | 0.039***          | 0.025*                          |
| Jaw Joint               | 1.364***   | 0.082***          | 0.160***                        |
| Supra-otoccipital       | 0.606***   | 0.159***          | 0.092***                        |
| Basioccipital           | 1.378***   | 0.069***          | 0.101***                        |
| Occipital condyle       | 0.783***   | 0.432***          | 0.300***                        |
| Pterygoid               | 1.028***   | 0.033**           | 0.076***                        |
| Palatine                | 0.619***   | 0.058***          | 0.024**                         |

**Table S12. Correlation coefficient (R) from two-block partial least squares analysis across partitions based on shape data from globally aligned skull data and within-partition generalized Procrustes alignment (\* $P < 0.05$ ; \*\* $P < 0.01$ ; \*\*\* $P < 0.001$ ). Analysis performed using the `two.b.pls` function in the `geomorph` R package (12, 13).**

| Premaxilla | Nasal    | Maxilla  | Jugal    | Frontal  | Parietal | Squamosal/<br>Supratemporal | Jaw<br>Joint | Supra-<br>otoccipital | Occipital<br>condyle | Basioccipital +<br>Basisphenoid | Pterygoid | Palatine |
|------------|----------|----------|----------|----------|----------|-----------------------------|--------------|-----------------------|----------------------|---------------------------------|-----------|----------|
| 0.786***   | 0.783*** | 0.774*** | 0.594*** | 0.871*** | 0.855*** | 0.911***                    | 0.701***     | 0.783***              | 0.860***             | 0.877***                        | 0.768***  | 0.686*** |

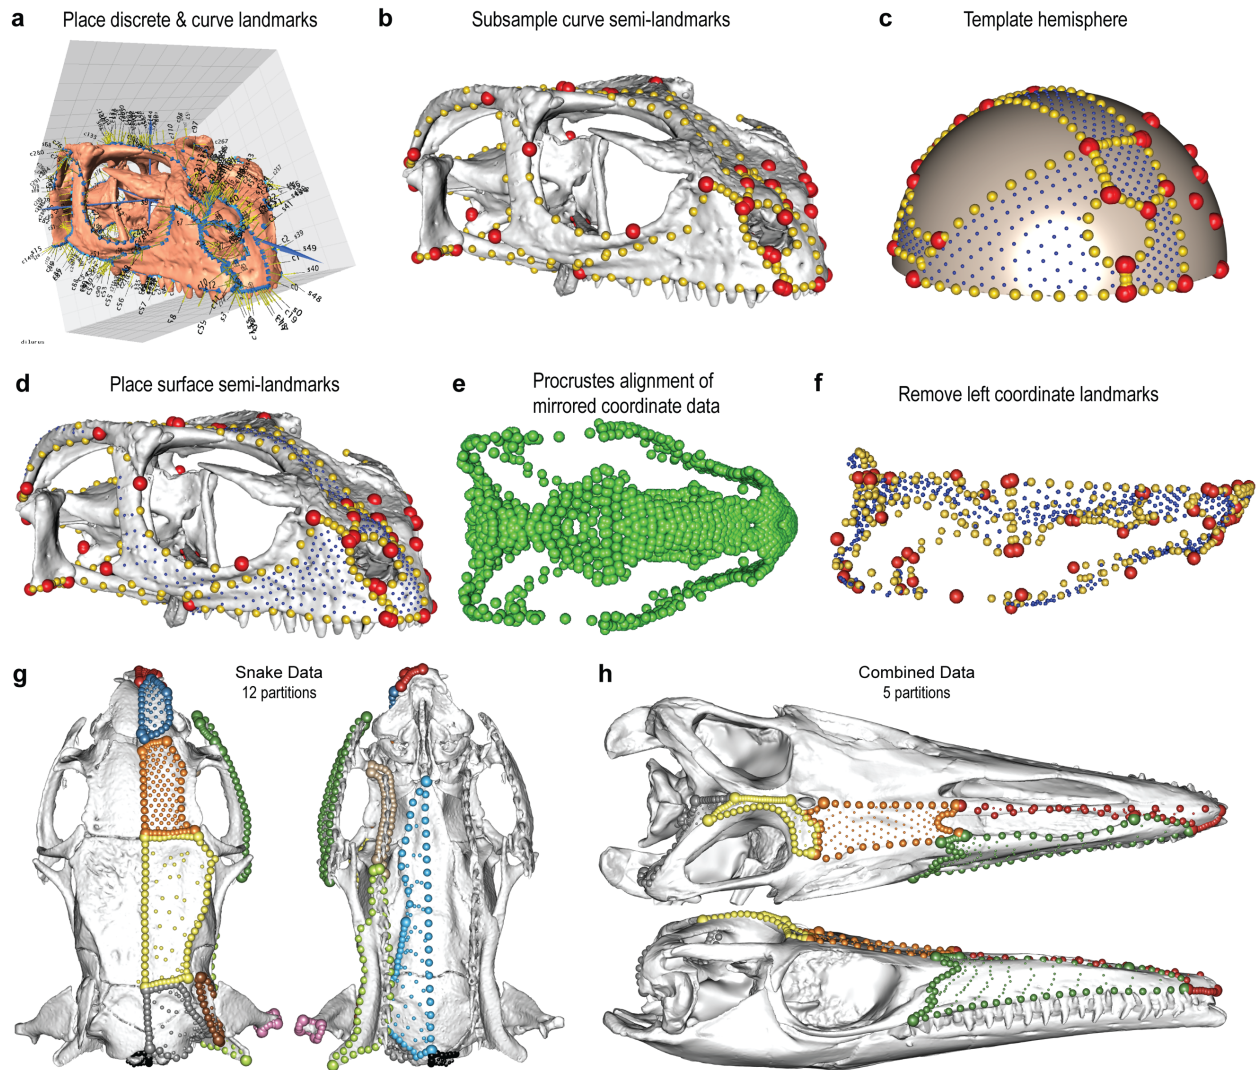

**Fig. S1. Procedure used in this study for collecting high-dimensional coordinate data.** **a**, virtual placement of landmarks and curve semi-landmarks in the program Landmark Editor to delineate anatomical partitions (3). **b**, Subsampling of curve semi-landmarks (yellow points) in R by adapting code from ref. (5). **c**, Template mesh with equivalent landmarks and curve semi-landmarks with surface semi-landmarks placed in similar densities within each partition (blue points). **d**, Use of `placePatch` function in the `Morpho` (6) R package to semi-automatically map surface semi-landmarks within partitions (blue points) onto 3-D mesh of actual specimens using thin plate spline method based on positions of landmarks (red points) and curve semi-landmarks (yellow points) on the template mesh and specimens. **e**, Mirroring of primarily right-sided coordinate data onto the left side prior to Procrustes alignment to avoid artifact originating from aligning one-sided data of bilaterally symmetric structures (9, 10). **f**, Removal of left-sided coordinate data (with the exception of occipital condyle digitized on the left side) after Procrustes alignment. **g**, Landmark scheme for snake dataset on skull of *Sonora semiannulata* (FMNH 26876) in dorsal and ventral views. **h**, Landmark scheme for combined dataset on skull of the mosasaur *Plotosaurus bennisoni* (UCMP 32778) in dorsal and lateral views.

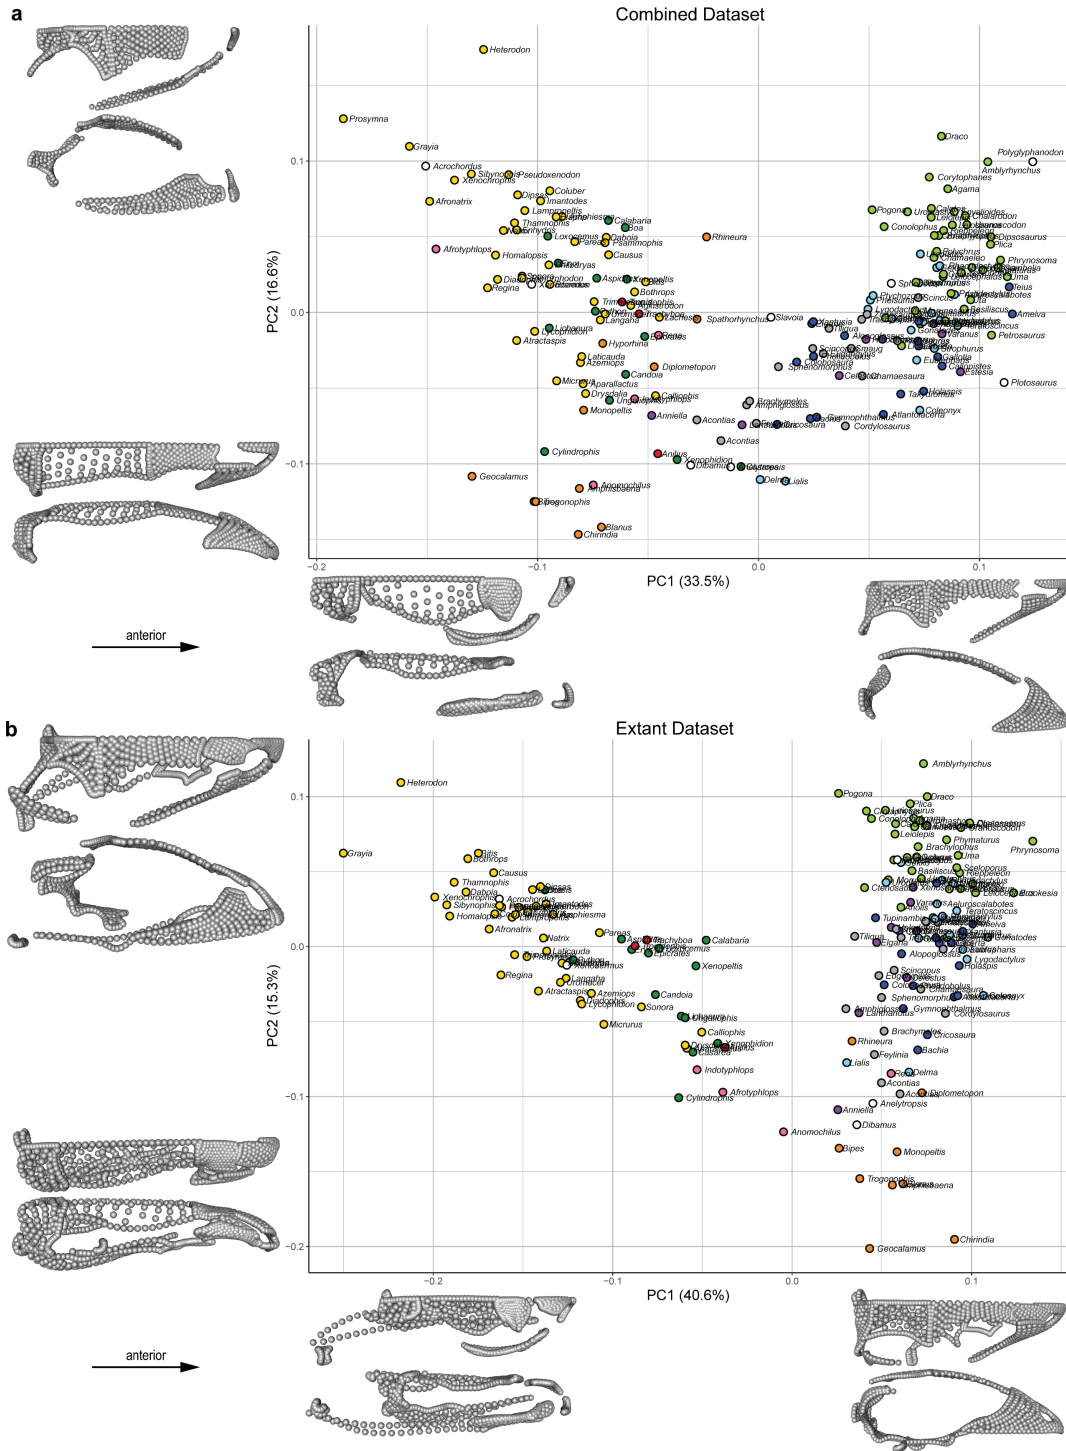

**Fig. S2. Morphospace constructed from first two principal components (PC) of skull shape. a, PC2 vs PC1 plot of combined dataset with taxonomic labels. b, PC2 vs. PC1 plot of extant-only dataset with taxonomic labels. Shapes along PC axes represent those at maximum and minimum scores in respective PC axes to illustrate shape changes associated with PC axes (top, dorsal view; bottom, lateral view).**

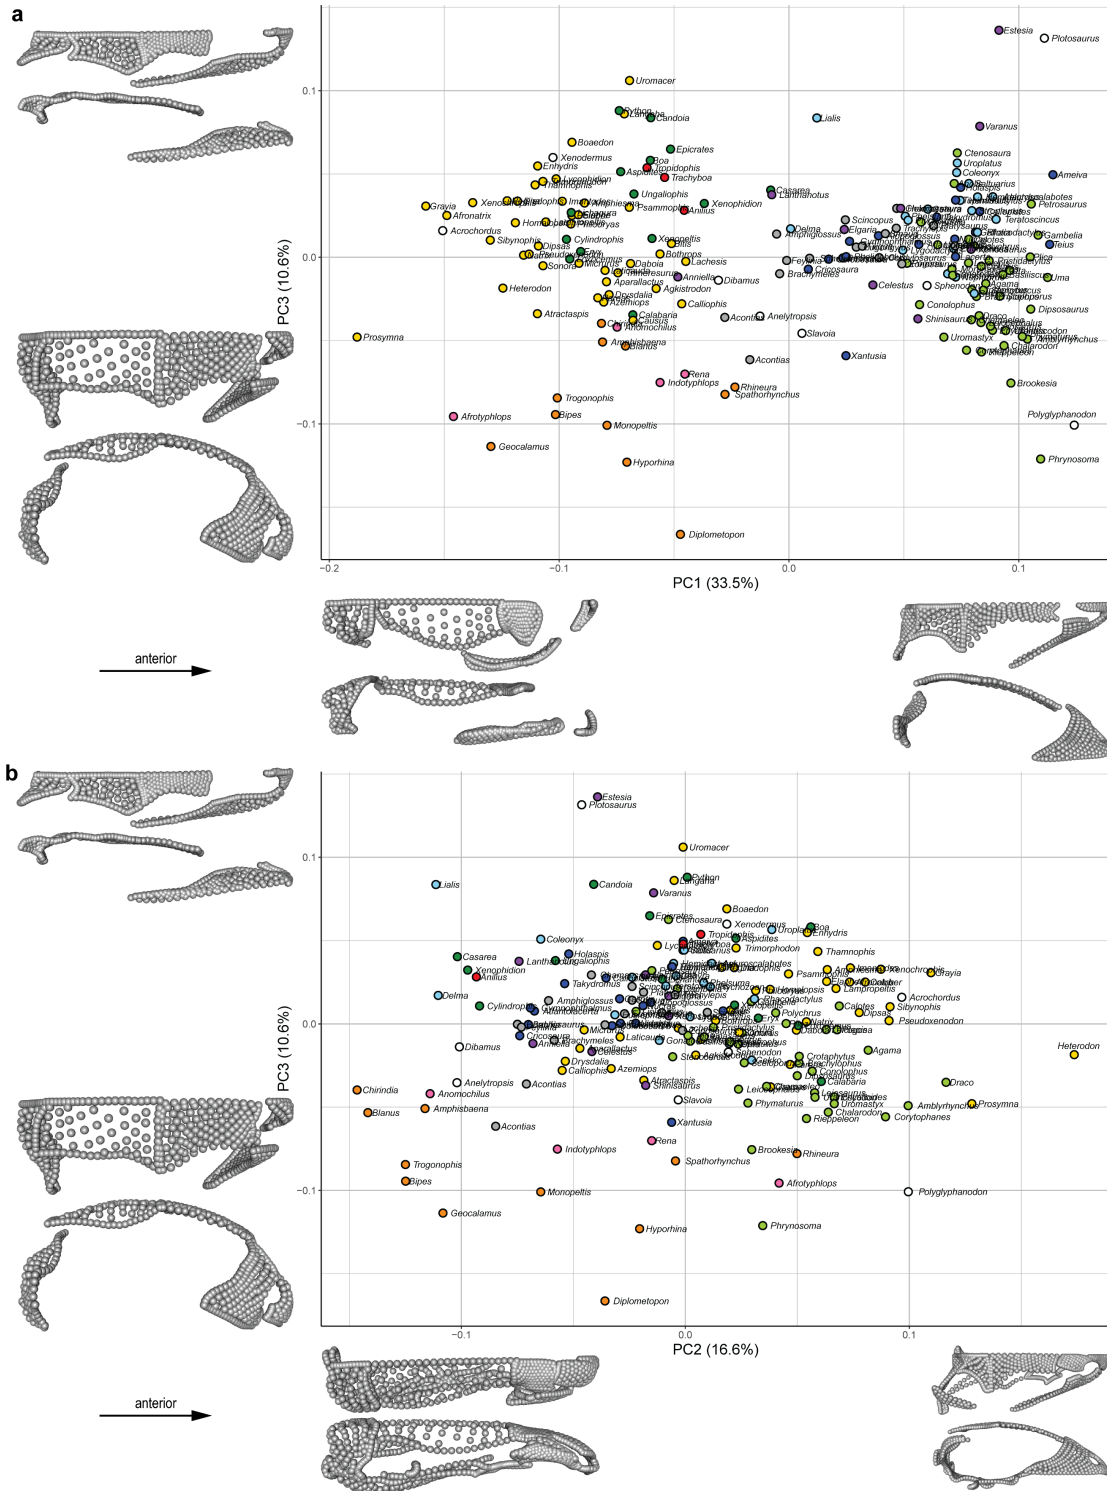

**Fig. S3. Morphospace constructed from first three principal components (PC) of skull shape. a, PC3 vs PC1 plot of combined dataset with taxonomic labels. b, PC3 vs. PC2 plot of combined dataset with taxonomic labels. Shapes along PC axes represent those at maximum and minimum scores in respective PC axes to illustrate shape changes associated with PC axes (top, dorsal view; bottom, lateral view).**

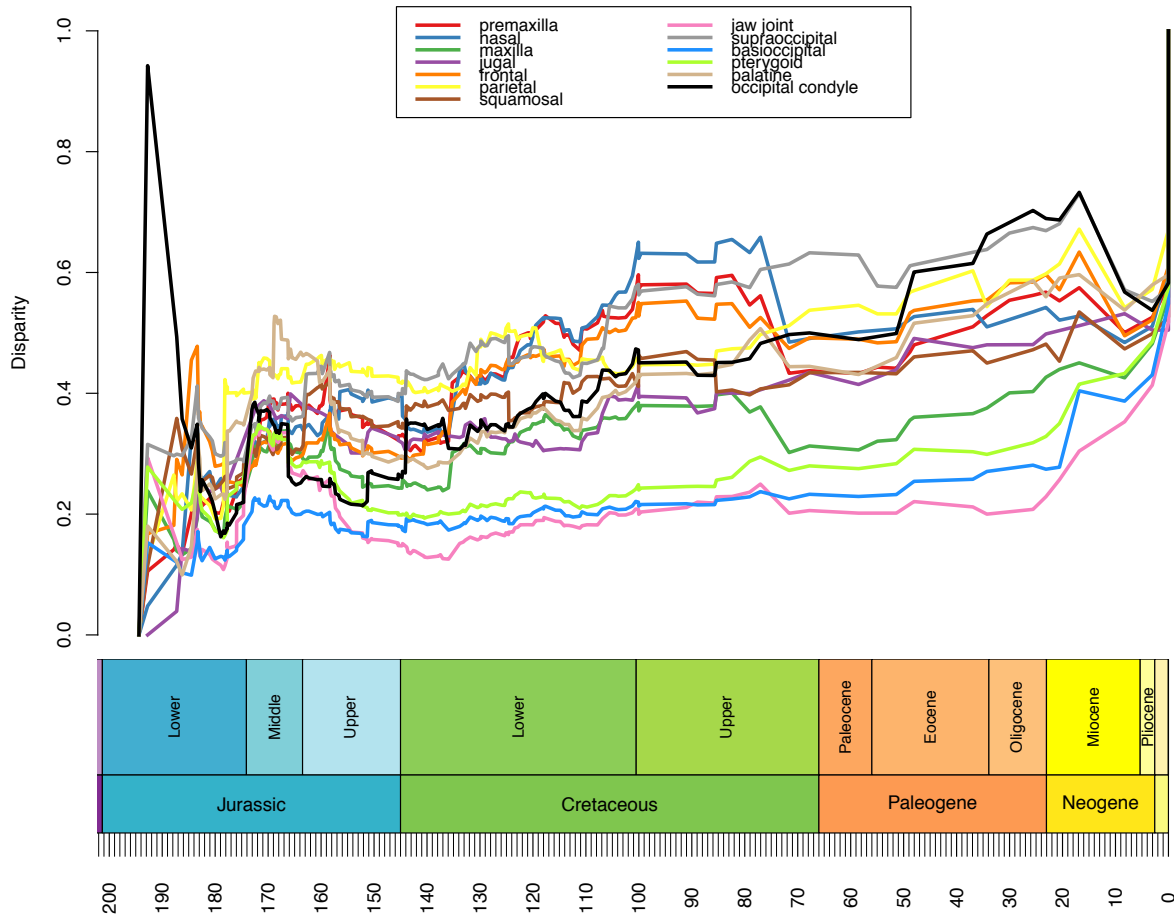

**Fig. S4. Disparity (Procrustes variance) through geologic time across modules.** For ease of comparing temporal dynamics, Procrustes variance is corrected by the number of landmarks and sliding semi-landmarks within each module.

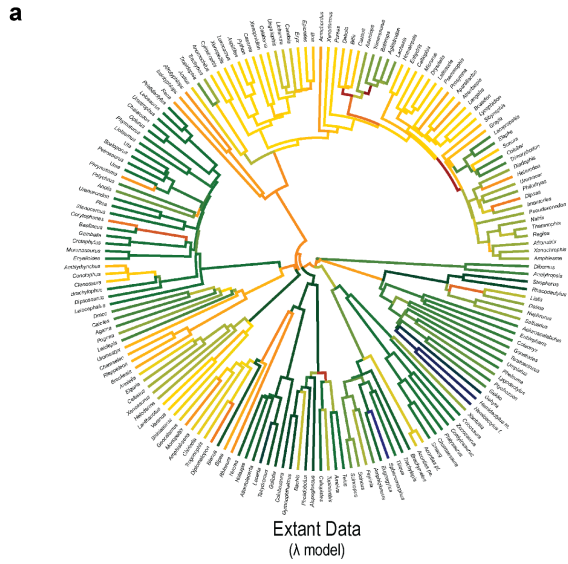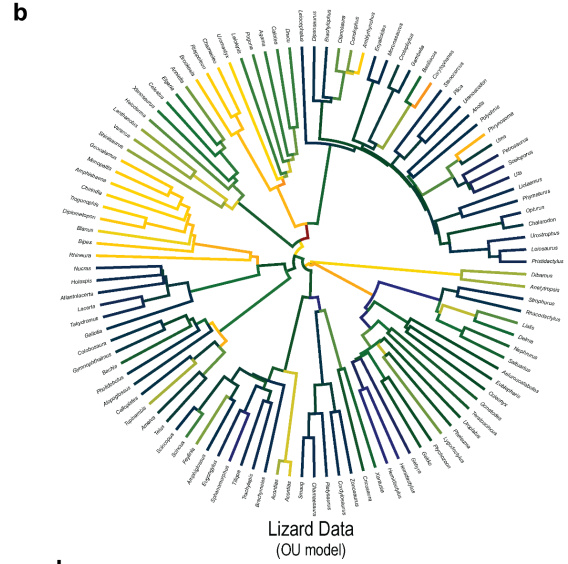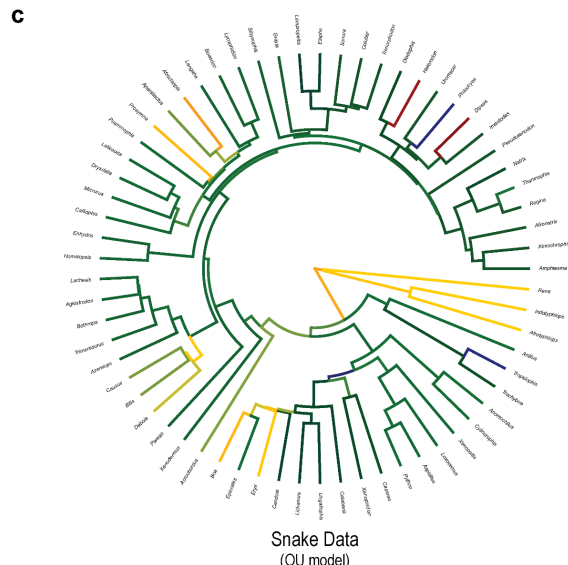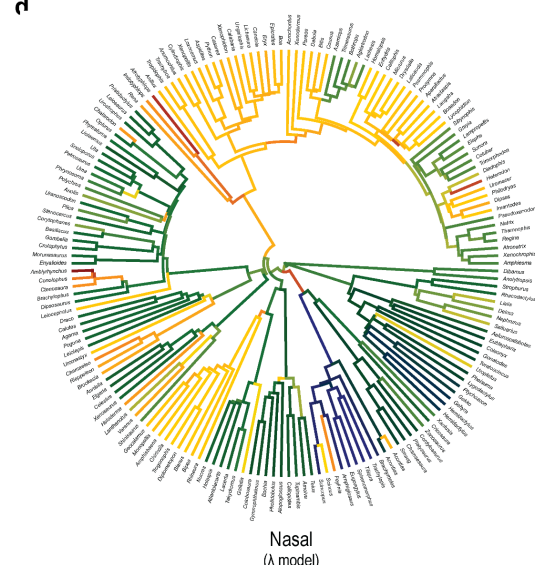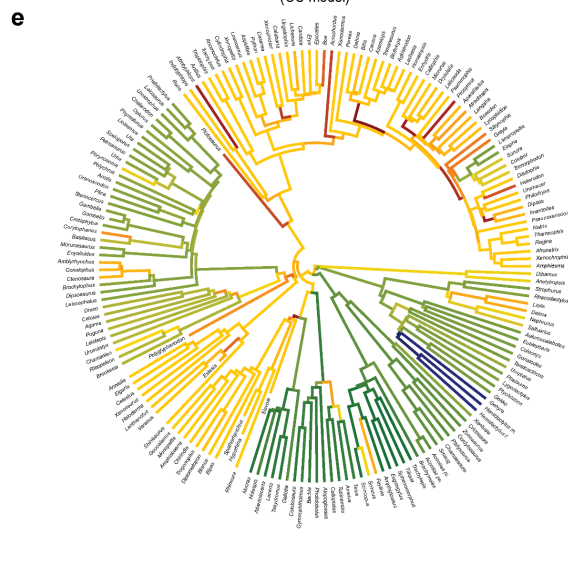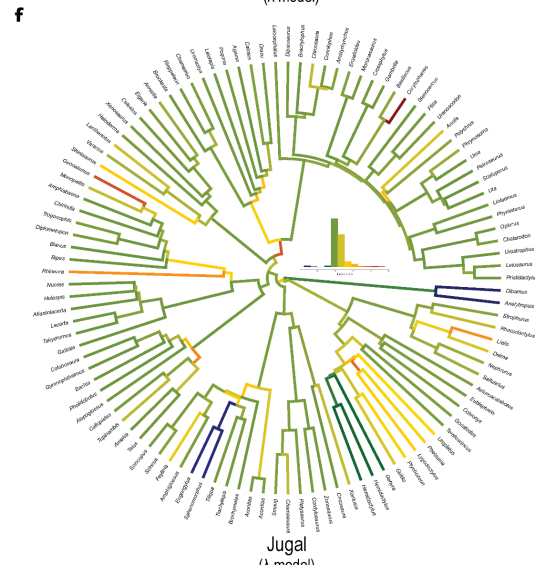



g

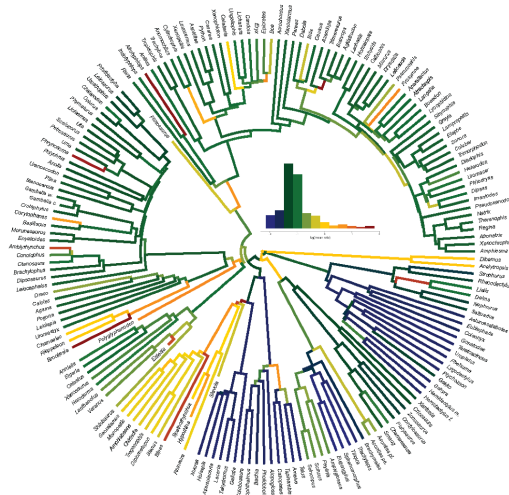

Frontal  
( $\lambda$  model)

h

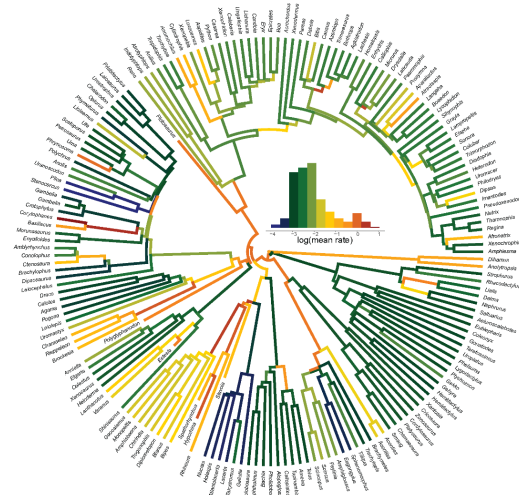

Parietal  
( $\lambda$  model)

i

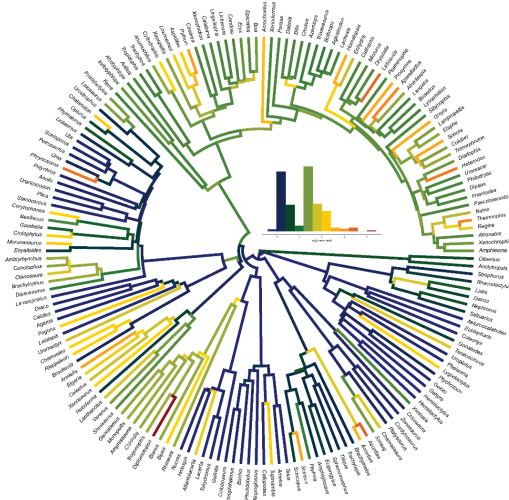

Squamosal/supratemporal  
( $\delta$  model)

j

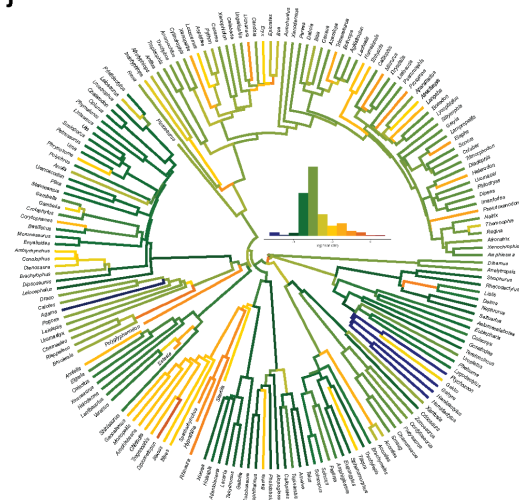

Supraoccipital  
( $\lambda$  model)

k

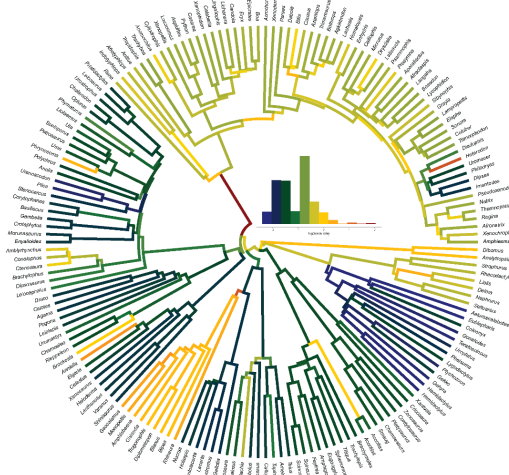

Basioccipital  
( $\lambda$  model)

l

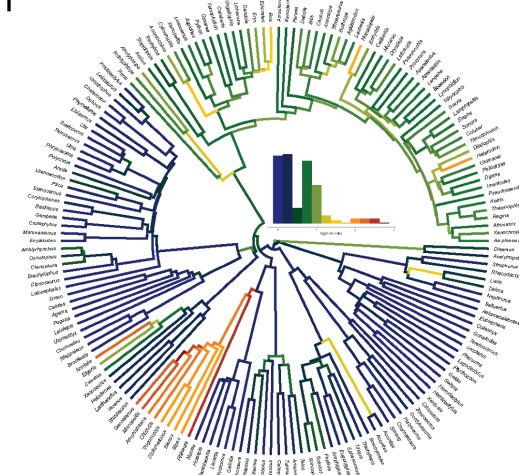

Occipital condyle  
( $\lambda$  model)

m

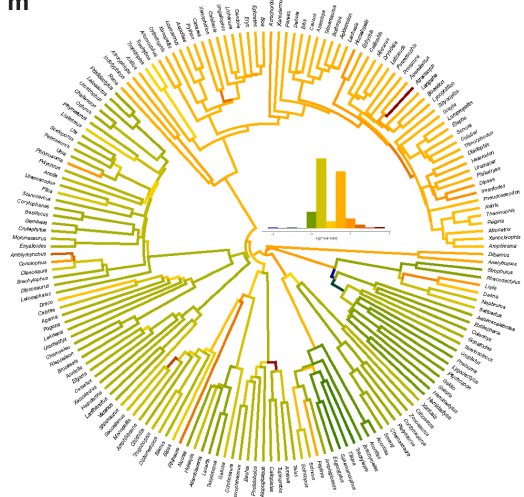

Palatine  
( $\lambda$  model)

n

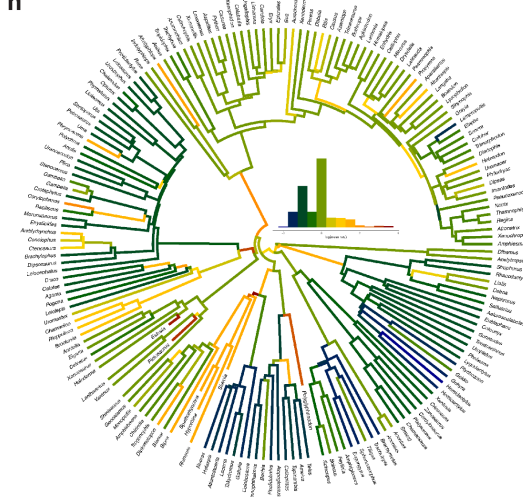

Combined Dataset (Alternative Topology)  
(OU model)

o

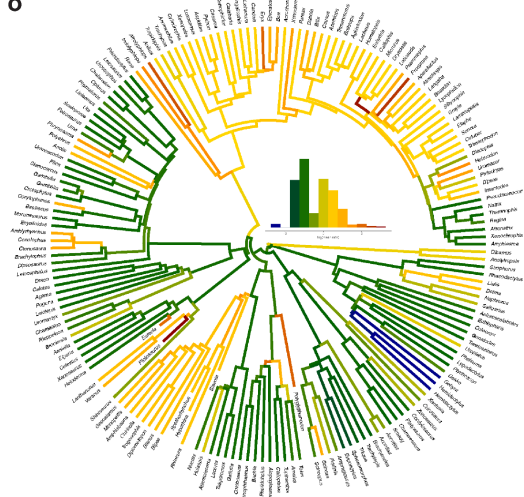

Premaxilla (Alternative Topology)  
( $\lambda$  model)

p

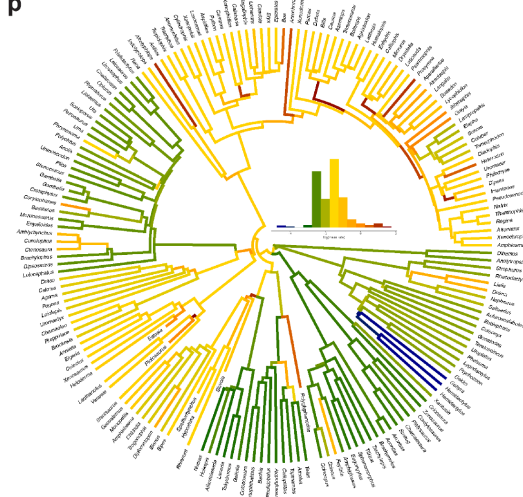

Maxilla (Alternative Topology)  
( $\lambda$  model)

q

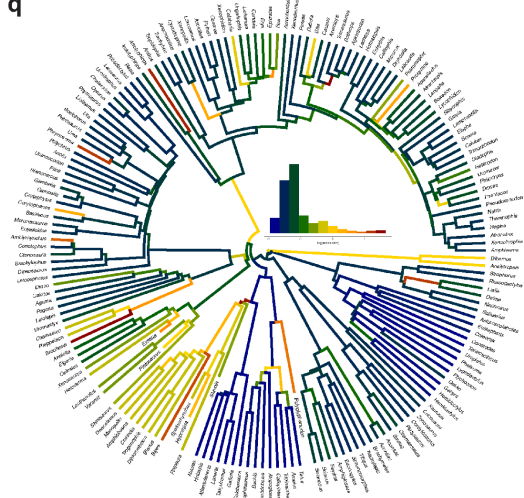

Frontal (Alternative Topology)  
( $\lambda$  model)

r

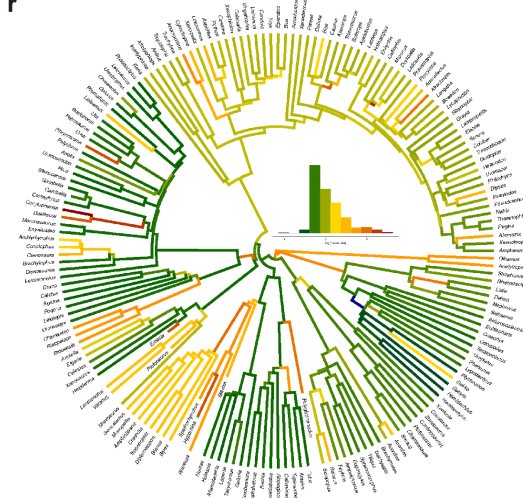

Parietal (Alternative Topology)  
( $\lambda$  model)

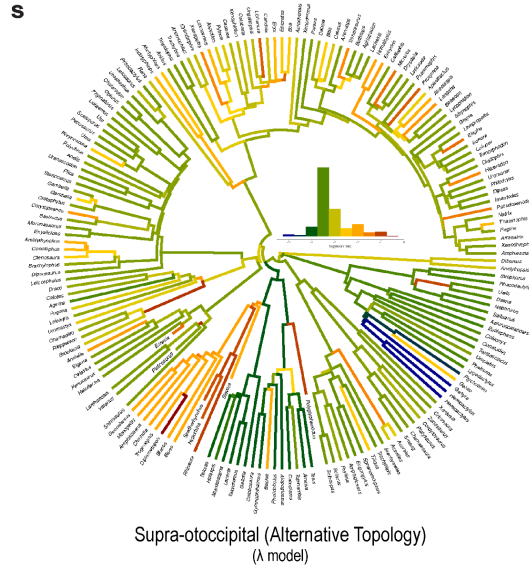

**Fig. S5. Estimated rates of cranial shape evolution mapped on time-calibrated phylogeny of squamates under the best-supported models of trait evolution. a,** Evolutionary rates of overall skull shape of extant dataset under  $\lambda$  model. **b,** Evolutionary rates of overall skull shape of lizard dataset under OU model. **c,** Evolutionary rates of overall skull shape of snake dataset under OU model. **d,** Evolutionary rates of nasal of extant dataset under  $\lambda$  model. **e,** Evolutionary rates of maxilla of combined dataset under  $\lambda$  model. **f,** Evolutionary rates of jugal of lizard dataset under  $\lambda$  model. **g,** Evolutionary rates of frontal of combined dataset under  $\lambda$  model. **h,** Evolutionary rates of parietal of combined dataset under  $\lambda$  model. **i,** Evolutionary rates of squamosal (supratemporal) of extant dataset under  $\delta$  model. **j,** Evolutionary rates of supra-otoccipital of combined dataset under  $\lambda$  model. **k,** Evolutionary rates of basioccipital of extant dataset under  $\lambda$  model. **l,** Evolutionary rates of occipital condyle of extant dataset under  $\lambda$  model. **m,** Evolutionary rates of palatine of extant dataset under  $\lambda$  model. **n,** Evolutionary rates of overall skull shape of combined dataset with alternative topology under OU model. **o,** Evolutionary rates of premaxilla of combined dataset with alternative topology under  $\lambda$  model. **p,** Evolutionary rates of maxilla of combined dataset with alternative topology under  $\lambda$  model. **q,** Evolutionary rates of frontal of combined dataset with alternative topology under  $\lambda$  model. **r,** Evolutionary rates of parietal of combined dataset with alternative topology under  $\lambda$  model. **s,** Evolutionary rates of supra-otoccipital of combined dataset with alternative topology under  $\lambda$  model. Color gradient on branches indicates rate of shape evolution as indicated by histogram. Color of circular band denotes taxonomic group as specified in Fig. 2. Rates estimated using BayesTraitsV3 (23). Time-calibrated tree based on Zheng & Wiens (14) and occurrence data from Paleobiology Database (paleobiodb.org).

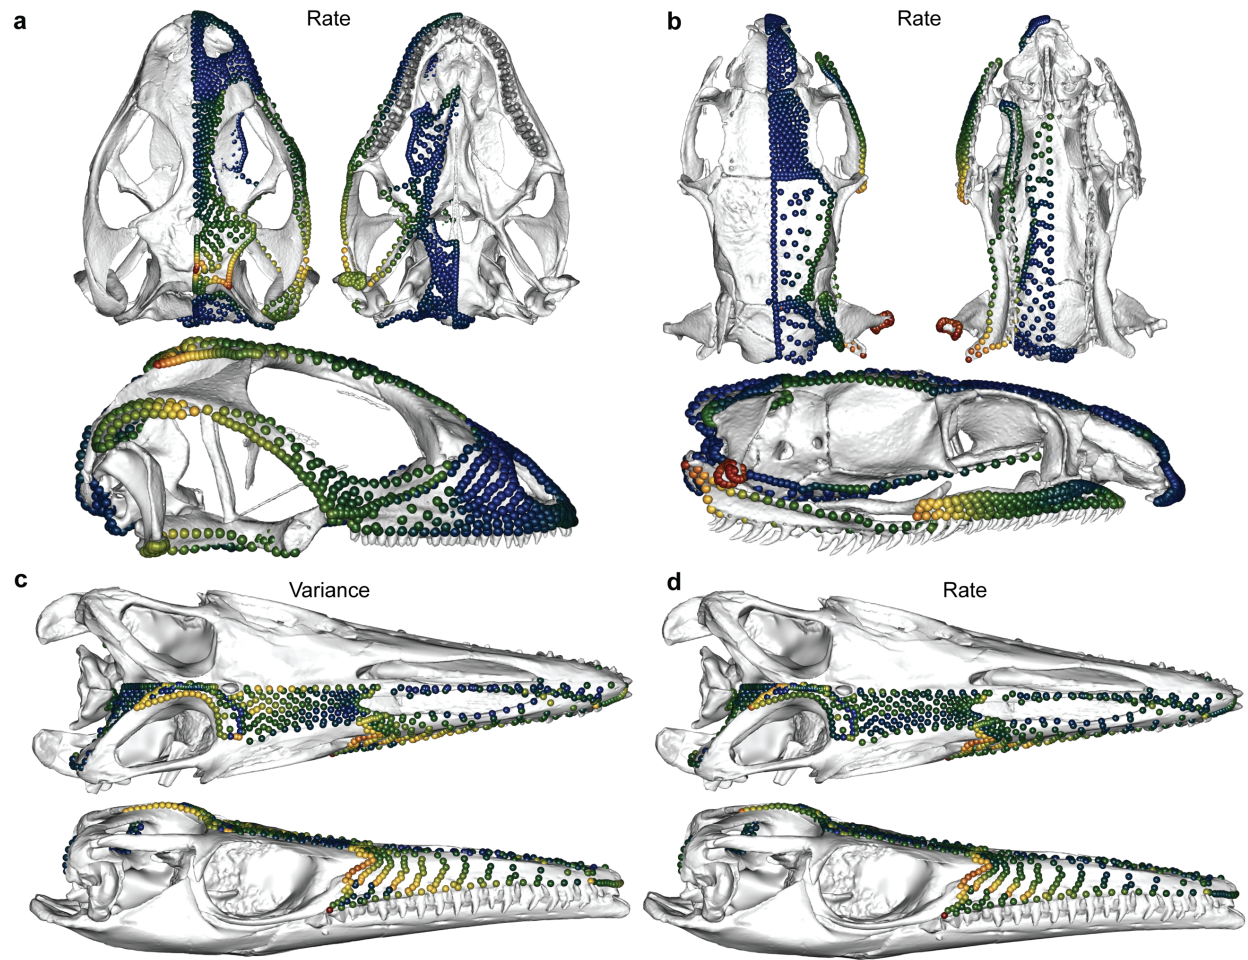

**Fig. S6. Procrustes variance and rate within landmarks for the lizard, snake, and combined datasets.** Landmarks on skull reconstruction in dorsal (top left), ventral (top right), and lateral (bottom) views indicating mean evolutionary rates in lizards (**a**) and snakes (**b**). Landmarks on skull reconstruction of *Plotosaurus bennisoni* (UCMP 32778) in dorsal and lateral views colored by Procrustes variance (**c**) and mean evolutionary rates (**d**) of combined dataset. Warmer colors indicate greater values.

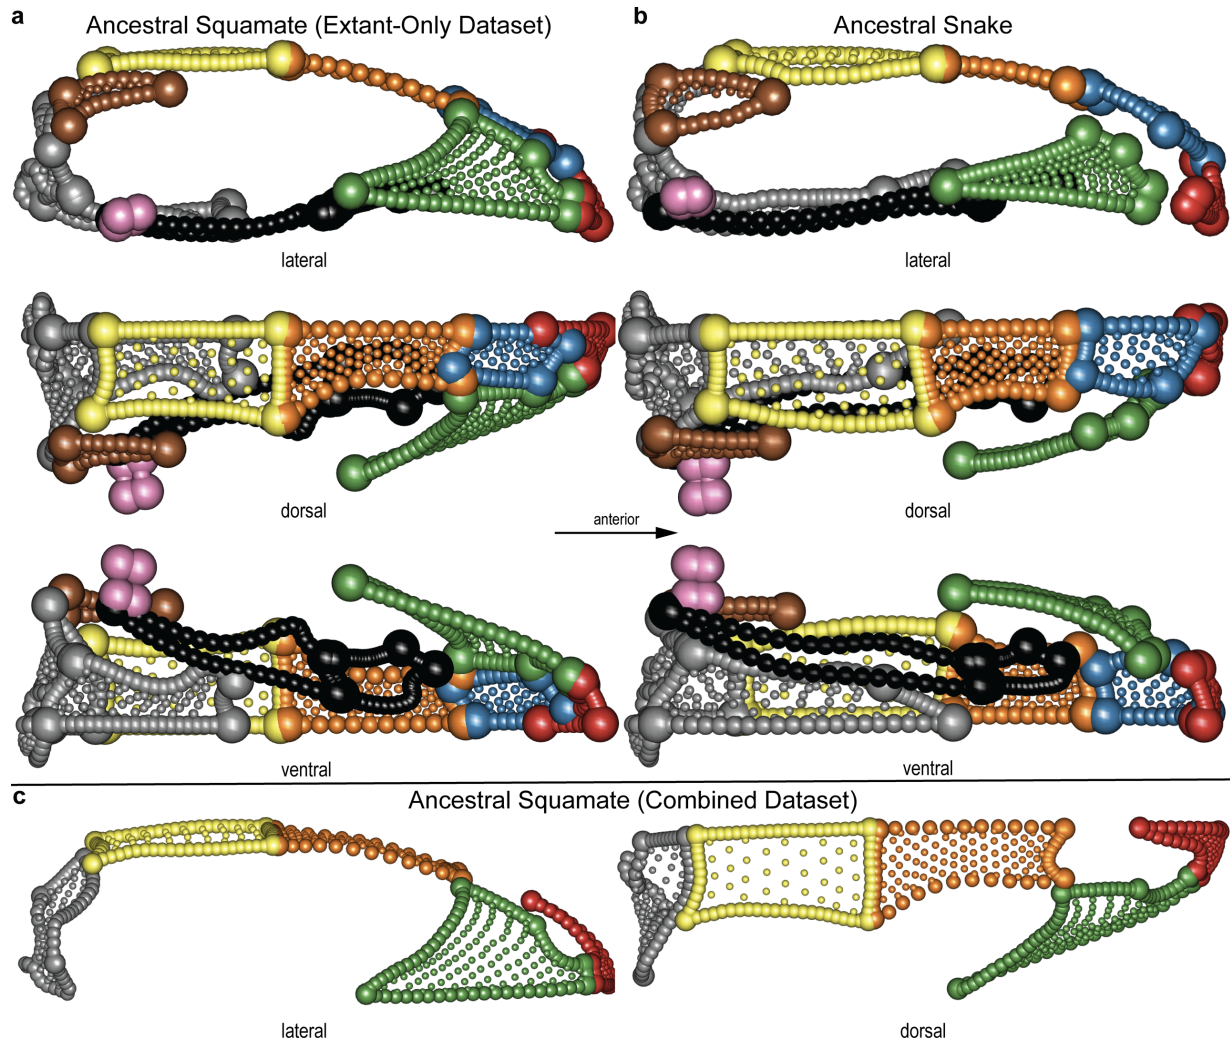

**Fig. S7. Estimated ancestral skull shape of (a) crown-group squamates; (b) snakes, in lateral, dorsal, and ventral views; (c) combined dataset with five partitions. Colors correspond to partitions as specified in Fig. 1a of the main text.**

a

Lizard Dataset

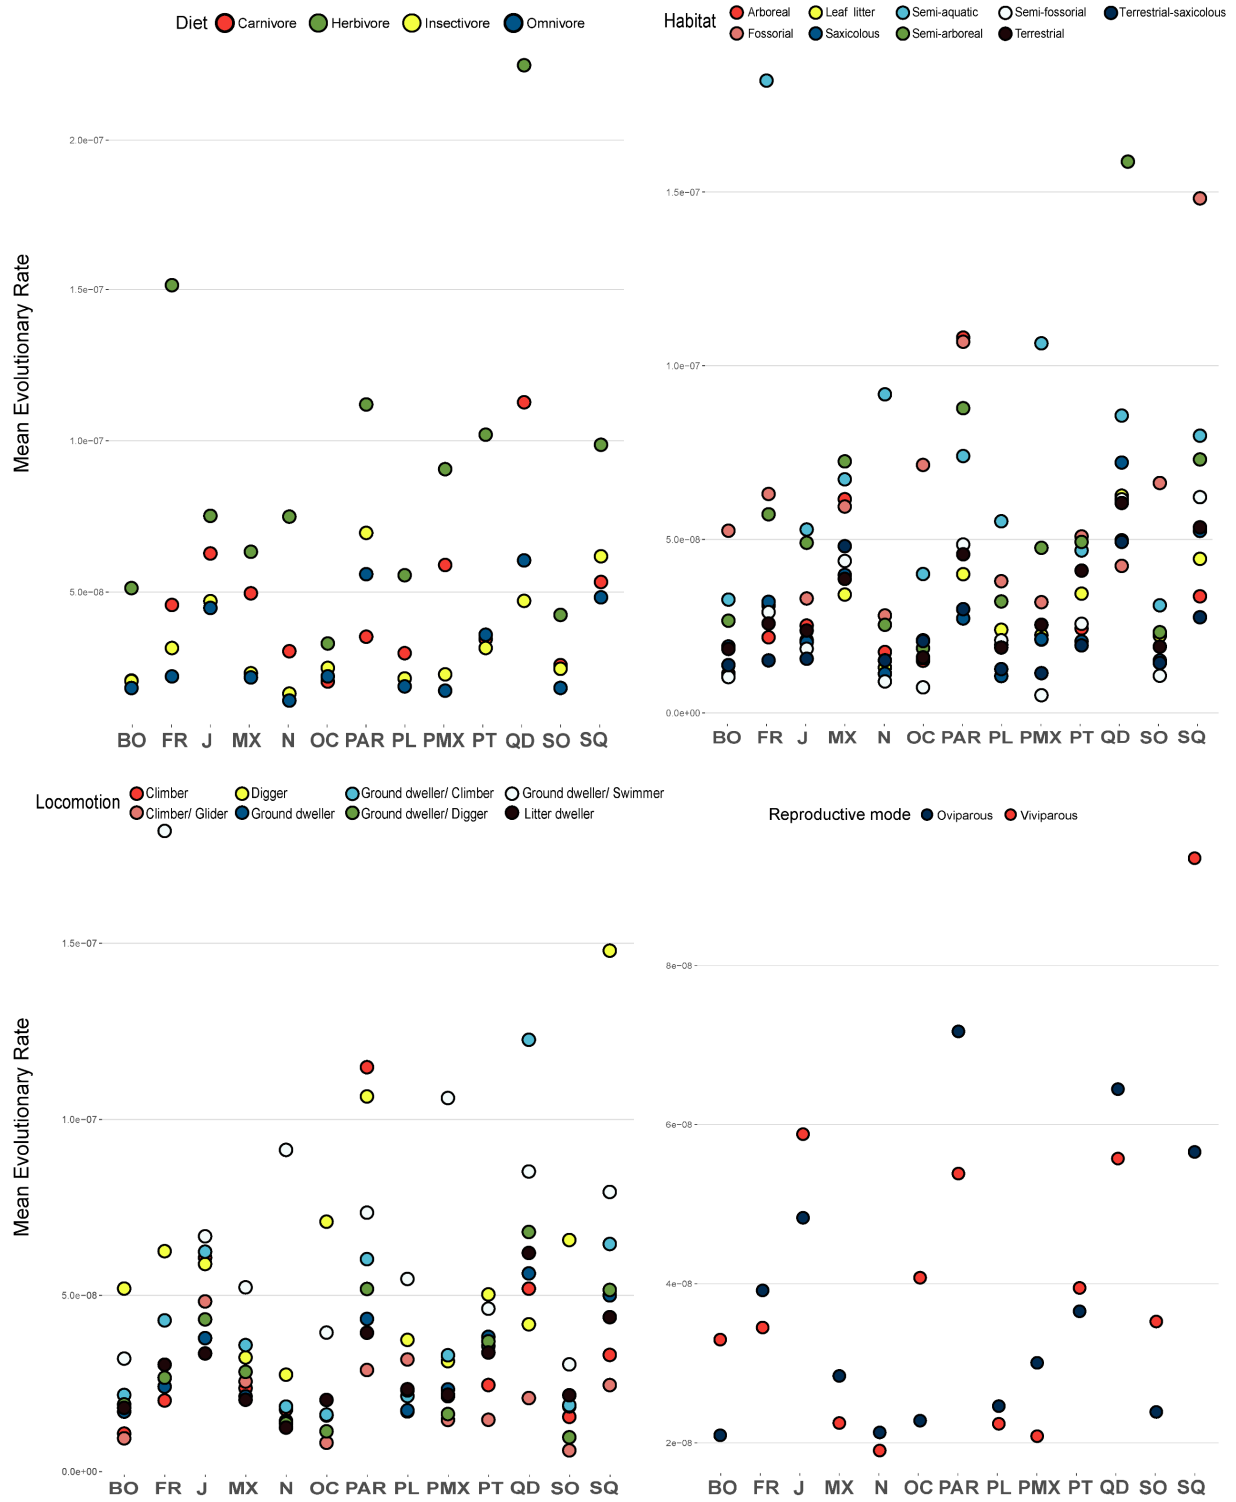

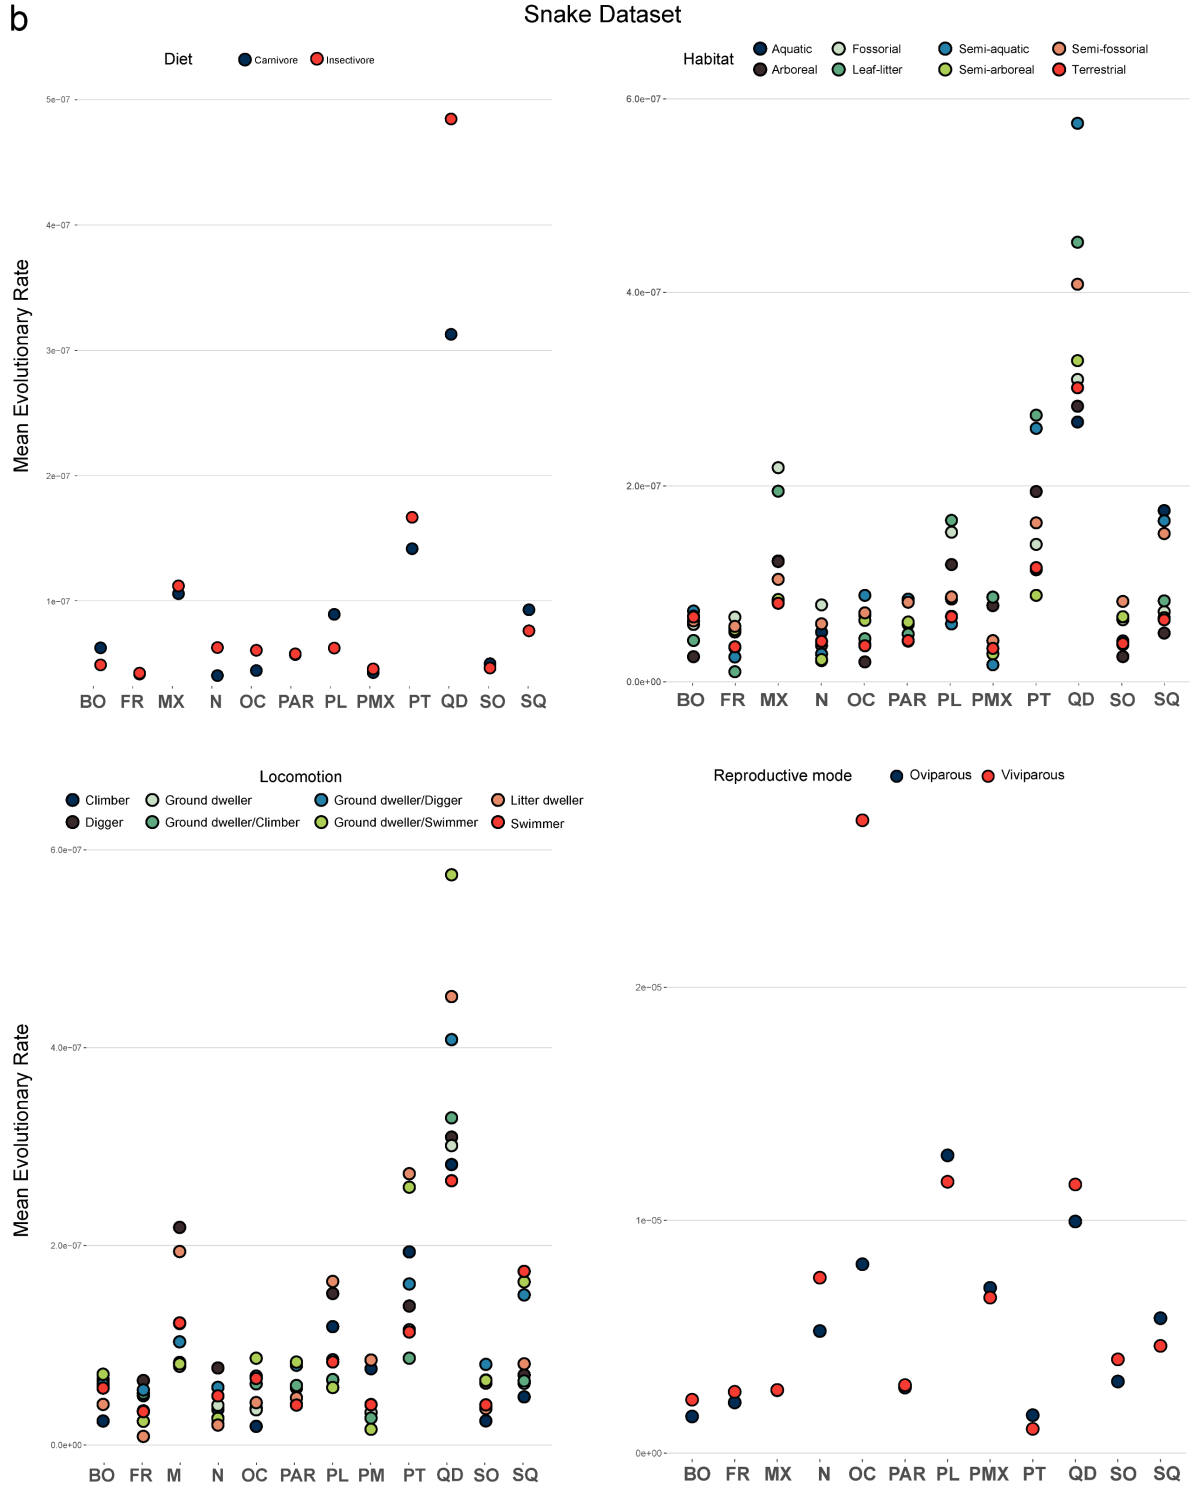

**Fig. S8. Mean evolutionary rate of each partition colored by trait values in (a) lizards and (b) snakes.** Mean evolutionary rates calculated from the lizard and snake datasets using the `compare.multi.evol.rates` function in `geomorph` R package (12). **Abbreviations:** BO, basioccipital; FR, frontal; MX, maxilla; N, nasal; OC, occipital condyle; PAR, parietal; PL, palatine; PMX, premaxilla; PT, pterygoid; QD, jaw joint of the quadrate; SO, supra-otoccipital; SQ, squamosal (supratemporal).

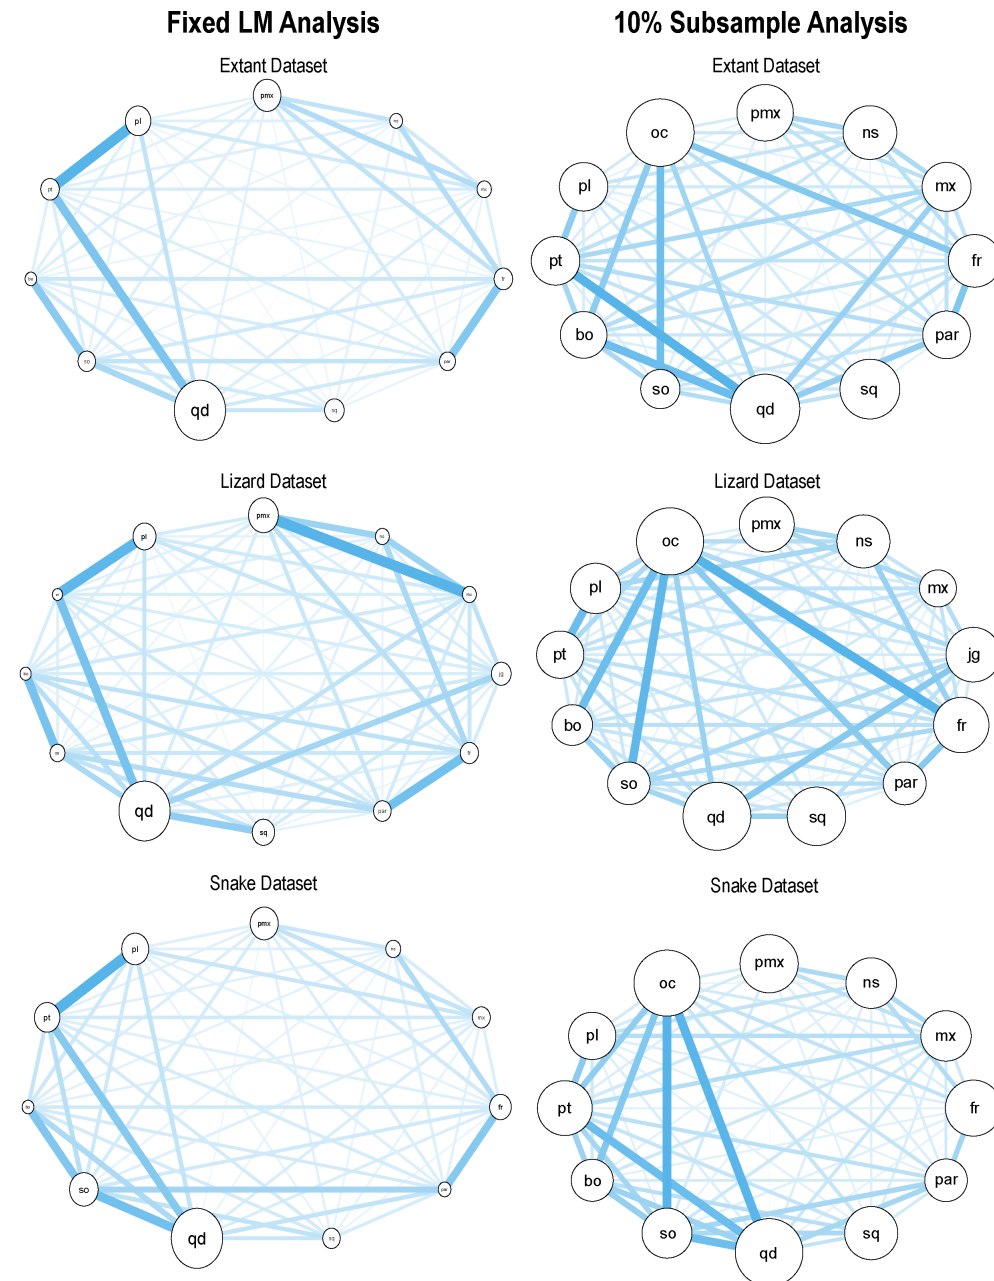

**Fig. S9.** Network diagram showing the strength of correlation within and between cranial partitions based on EMMLi analysis with only fixed (left) and subsampled (right) landmarks. The thickness of the lines and size of the circles are concomitant with the strength of between- and within-partition correlations, respectively. Note the general congruence of the results to that of the full shape data reported in the manuscript, where strong correlation was observed between supra-otoccipital-basioccipital and parietal-palatine (occipital condyle was excluded from fixed landmark-only analysis because the two fixed landmarks defining the region are part of other regions (i.e., supra-otoccipital, basioccipital)). In snakes, the quadrate has greater correlations with occipital elements, as reported in the manuscript. Strong correlation between the frontal and parietal in lizards, as reported in the manuscript, but greater correlation observed in fixed-only analysis may be due to exaggerated correlation from shared border. **Abbreviations:** bo, basioccipital; fr, frontal; jg, jugal; mx, maxila; ns, nasal; oc, occipital condyle; par, parietal; pl, palatine; pt, pterygoid; qd, jaw joint on quadrate; so, supra-otoccipital; sq, squamosal/supratemporal.



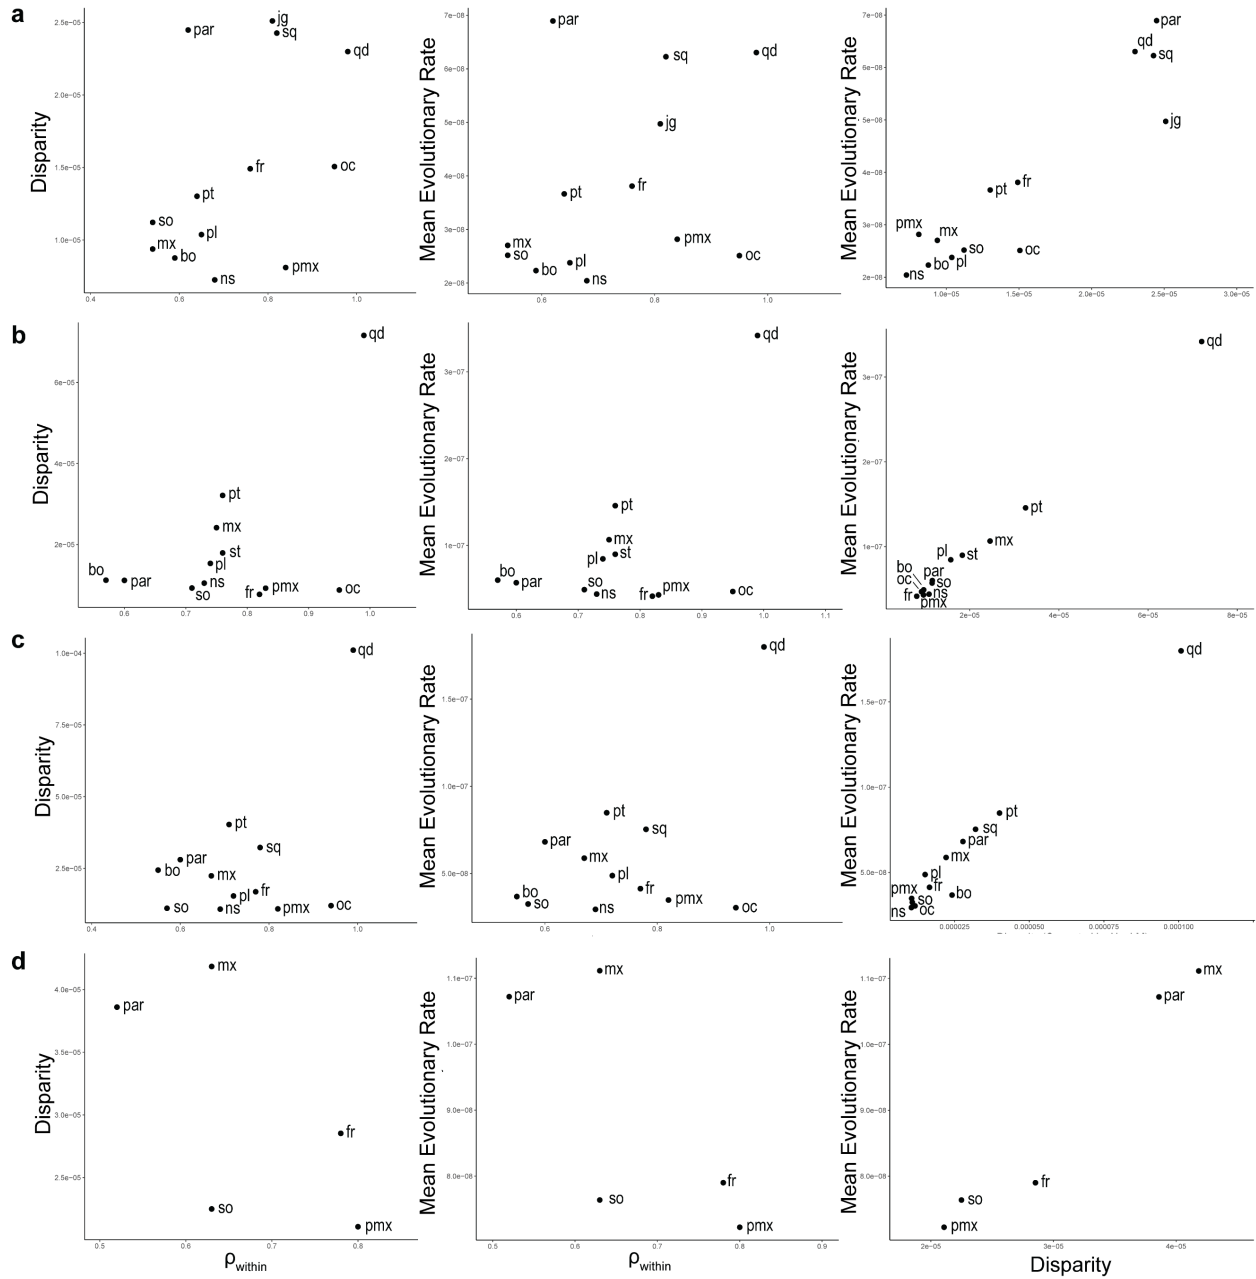

**Fig. S10. Bivariate plots of disparity, mean evolutionary rate, and within-partition trait correlation ( $\rho_{\text{within}}$ ).** **a**, lizard dataset; **b**, snake dataset; **c**, extant dataset; **d**, combined dataset. Disparity and mean rates are corrected by the number of landmarks and sliding semi-landmarks in the partition.

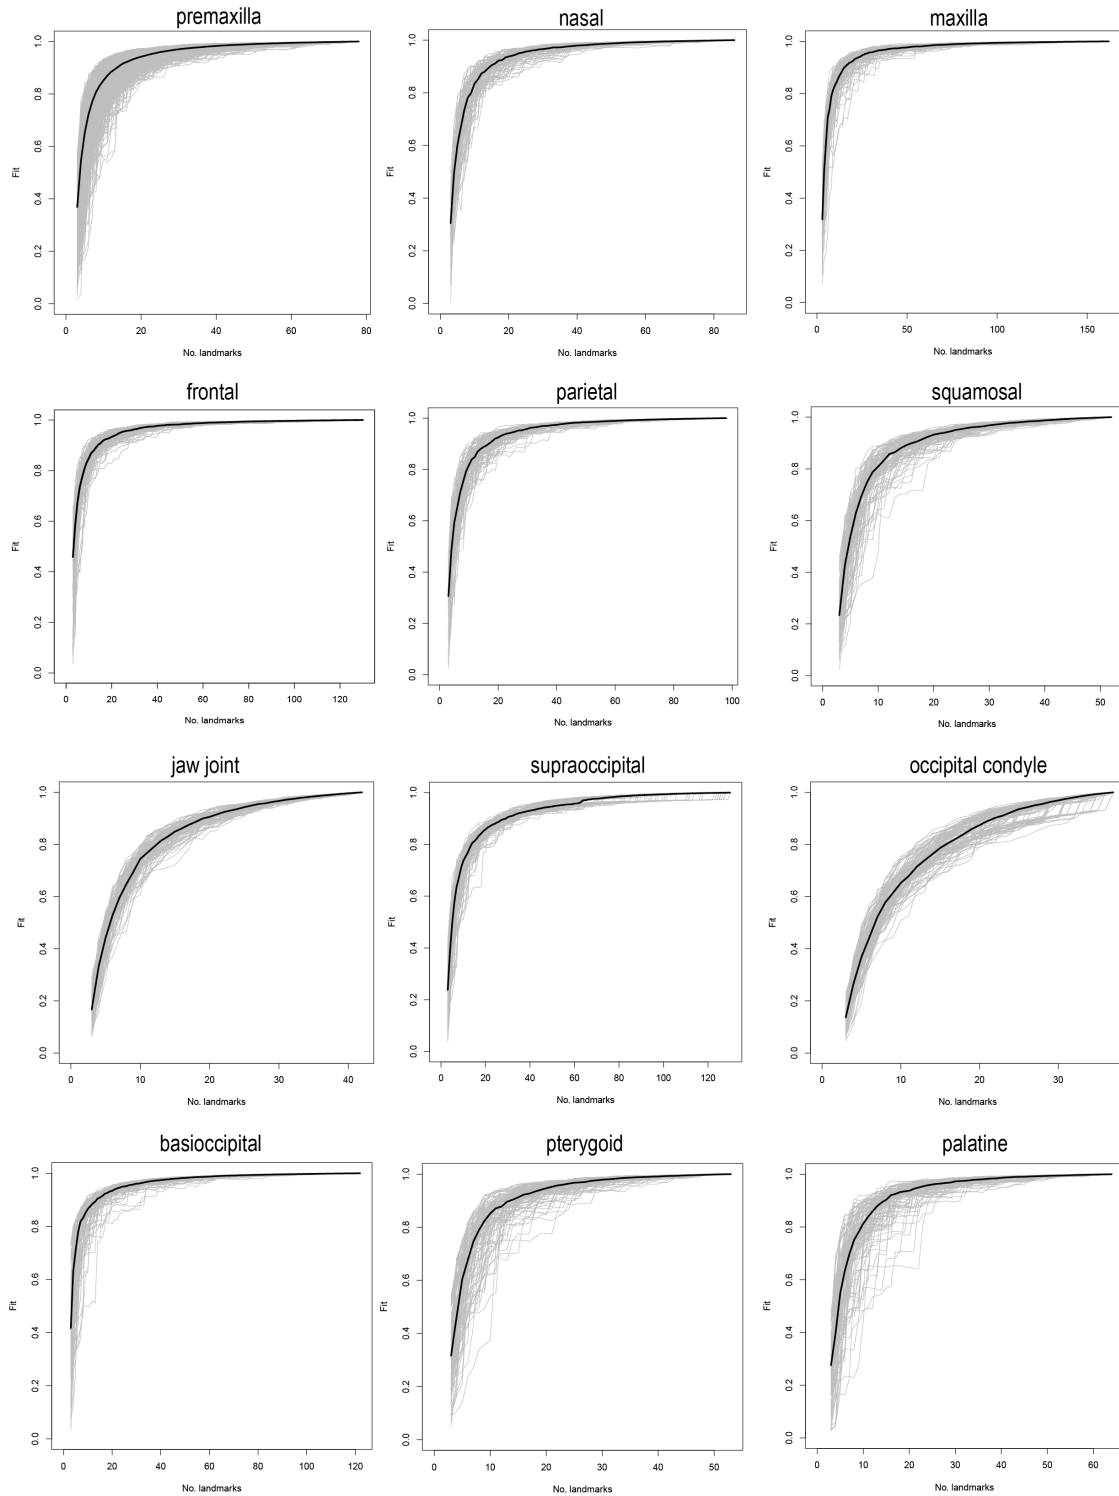

**Fig. S11. Landmark and sliding semi-landmark sampling plots from performing LaSEC (33) on extant data for each partition.** These plots indicate how iteratively subsampled data converge to the pattern of shape variation in the full shape data as landmark and sliding semi-landmark sampling is increased by one each time. Bold line indicates median ‘fit’ value, as measured by Procrustes sum of squares. Note that for many partitions, 10–25 landmarks and sliding semi-landmarks are required to reach a plateau (stationarity) in the characterization of shape variation.
